# Supplementary material
Source: publisher figshare collection journal article supplement (https://diabetesjournals.figshare.com/ndownloader/files/29148492)
Supplement: Supplementary file 1 [file 29148492]

## Sheet: Transcriptome
Gene		gene_name	beta3KO_01	beta3KO_02	beta3KO_03	WT1	WT2	WT3
ENSRNOG00000056604		RF00003	0	0	0	0	0	0
ENSRNOG00000032813		Mdc1	42.752	45.1082	50.7019	55.7771	49.868	51.8429
ENSRNOG00000054550		AABR07045015.1	0	0	0	0	0	0
ENSRNOG00000004322		Sh3kbp1	16.4442	15.421	17.6538	22.4493	27.5799	25.8936
ENSRNOG00000051638		RF00004	0	0	0	0	0	0
ENSRNOG00000062209		AABR07059168.3	0.729636	0.58442	0.474683	0.703414	0.380824	0.390343
ENSRNOG00000056110		Olr500	0.0217973	0	0	0	0	0
ENSRNOG00000052666		AABR07042662.1	0	0	0	0	0	0
ENSRNOG00000042411		Rps6ka1	36.8806	34.435	36.6715	47.5369	46.6684	47.1461
ENSRNOG00000060744		RF00405	0	0	0	0	0	0
ENSRNOG00000053402		Gabrq	8.62084	8.56465	10.1899	12.9662	9.28707	11.0089
ENSRNOG00000058717		RF00026	0	0	0	0	0	0
ENSRNOG00000049873		Ap1s3	4.97103	4.42407	4.87162	4.28967	4.98226	4.56675
ENSRNOG00000053499		RF00560	0	0	0	0	0	0
ENSRNOG00000017601		Srd5a1	5.24646	5.0912	4.8547	6.97052	7.64519	6.89672
ENSRNOG00000047322		Crb3	24.9629	25.2109	20.1488	20.9325	21.8579	18.4297
ENSRNOG00000008037		Tmed1	22.8741	21.4287	21.9565	19.4444	20.9768	21.2667
ENSRNOG00000054277		Capsl	10.4412	14.0752	10.9272	11.8309	11.6778	11.5296
ENSRNOG00000004107		Rpl23	615.847	628.797	618.651	564.572	639.5	582.751
ENSRNOG00000001953		Bace2	386.74	360.801	372.883	377.466	386.325	383.585
ENSRNOG00000050251		MGC105649	0.252932	0.434126	0.134328	0.691985	0.357333	0.471184
ENSRNOG00000056936		RF00100	0	0.0572961	0	0	0	0
ENSRNOG00000013816		Cmas	111.696	111.598	110.838	108.313	116.524	114.669
ENSRNOG00000049959		Igsf21	0.452057	0.452608	0.0700232	0.206127	0.465681	0.226728
ENSRNOG00000060171		RF00026	0	0	0	0	0	0
ENSRNOG00000014372		Gjb3	0.0511553	0.0227634	0	0	0.189709	0.102627
ENSRNOG00000048172		Rac3	21.7694	23.551	21.8093	20.8826	26.2114	23.7922
ENSRNOG00000001842		Mrps35	14.2905	14.0578	11.848	11.4102	13.385	13.179
ENSRNOG00000039591		Dydc2	0	0.0235154	0.024557	0	0.152426	0
ENSRNOG00000012314		Slirp	2.96012	3.92207	2.48355	3.91795	4.84242	3.13958
ENSRNOG00000043828		AABR07068074.1	0	0	0	0	0	0
ENSRNOG00000018322		Picalm	140.1	140.98	140.637	160.147	148.982	152.846
ENSRNOG00000059566		AABR07005778.1	0.0362276	0	0.0168348	0	0	0.0181698
ENSRNOG00000027906		Ankrd11	12.1411	11.5563	14.6725	14.1408	13.3792	13.9839
ENSRNOG00000052146		RF00560	0	0	0	0	0	0
ENSRNOG00000008099		Galnt12	8.40151	7.09421	6.37549	7.59481	7.67229	7.72021
ENSRNOG00000042432		Nek11	0.432239	0.706413	0.613536	0.614308	0.420979	0.528174
ENSRNOG00000057180		Gpx5	0	0	0	0	0	0
ENSRNOG00000015386		AABR07066762.1	3.88434	3.93378	4.04578	3.90005	3.55988	3.82918
ENSRNOG00000055861		AABR07065429.1	0	0	0	0	0	0
ENSRNOG00000055276		RF00026	0	0	0	0	0	0
ENSRNOG00000047686		Pou3f1	0	0	0	0	0	0
ENSRNOG00000028087		Sdhaf4	35.4499	35.3095	27.8546	32.7156	29.269	30.6593
ENSRNOG00000049035		Krtap27-1	0	0	0	0	0	0
ENSRNOG00000013585		Nmnat3	3.65379	3.72265	3.98033	2.58294	3.16744	2.99415
ENSRNOG00000003131		Traf7	40.1977	39.377	37.4407	40.3661	38.7042	42.707
ENSRNOG00000048396		LOC108348138	0	0	0	0	0	0
ENSRNOG00000018128		Unc50	65.1921	65.8014	52.4621	53.8763	62.9531	55.7308
ENSRNOG00000002636		Abat	8.07191	8.46058	8.4324	9.13781	9.12072	9.81272
ENSRNOG00000057941		AABR07036331.2	1.26093	1.31239	1.3308	1.30304	1.51468	1.73646
ENSRNOG00000033512		Olr234	0	0	0	0	0	0
ENSRNOG00000027552		Tapbpl	37.212	36.032	34.892	32.1213	31.3392	30.9345
ENSRNOG00000027797		Nit2	49.6806	51.0193	47.094	45.2061	50.9111	49.3675
ENSRNOG00000054657		AABR07015067.2	1.82409	0	6.44213	0	1.50325	1.46379
ENSRNOG00000001839		Vpreb2	0	0.0296581	0	0	0.0274633	0.133711
ENSRNOG00000041554		Mir1306	0	0	0	0	0	0
ENSRNOG00000023547		AABR07022022.1	0.0216611	0.0192777	0	0	0.0178511	0
ENSRNOG00000017986		Zfp458	1.03814	0.929583	1.20161	0.701959	0.682334	0.683586
ENSRNOG00000005132		Slc52a3	1.56036	1.95141	1.89567	2.56693	1.95828	1.98462
ENSRNOG00000060434		AABR07053500.2	0	0.411259	0.0613536	0.309611	0.0544034	0
ENSRNOG00000046625		AC097791.1	0	0	0	0	0	0
ENSRNOG00000009125		Dis3	7.28301	6.93026	7.44279	7.02368	6.09525	6.60903
ENSRNOG00000053723		AABR07062833.1	0	0	0	0	0	0
ENSRNOG00000058675		AABR07035780.5	0.00809445	0.00720383	0.0526605	0.0822536	0.0600365	0.0893143
ENSRNOG00000047923		AC096239.1	0	0	0	0	0	0
ENSRNOG00000019586		Ccdc24	0.272221	0.228809	0.224889	0.15368	0.398826	0.273063
ENSRNOG00000014508		Mgll	3.06576	3.07145	3.41916	6.39502	5.4573	5.58816
ENSRNOG00000054066		RF00026	0	0	0	0	0	0
ENSRNOG00000057675		RF00003	0	0	0	0	0	0
ENSRNOG00000020166		Znrd1as	0	0	0	0	0	0
ENSRNOG00000012363		Peli2	1.59368	1.88541	1.62987	1.77605	1.87247	1.88751
ENSRNOG00000010589		LOC103689968	5.07434	8.21012	3.40499	3.83954	3.87236	4.02112
ENSRNOG00000012286		Il20ra	5.02495	4.64234	5.17554	8.04464	8.63908	7.96983
ENSRNOG00000001259		Cux2	27.4553	28.1089	29.5665	30.0416	23.0469	26.4383
ENSRNOG00000055353		RF00015	0	0	0	0	0	0
ENSRNOG00000007967		Sdhb	74.3302	76.6137	55.0802	65.914	74.6337	70.6011
ENSRNOG00000051180		LOC100911516	0.395798	0.460634	1.01867	1.45173	0.702545	0.671884
ENSRNOG00000054123		AABR07054562.2	0	0	0	0	0	0
ENSRNOG00000059829		RF00100	0	0	0	0	0	0
ENSRNOG00000017016		Ubqlnl	0	0	0	0	0	0
ENSRNOG00000002840		Atp5f1b	896.879	858.069	820.647	821.383	936.247	928.205
ENSRNOG00000019973		Arl3	93.8747	94.5516	84.6117	87.4777	89.9665	85.2496
ENSRNOG00000034128		RGD1560917	0.308069	0.913908	0.429475	0.561887	0.67702	0.72105
ENSRNOG00000054674		RF00026	0	0	0	0	0	0
ENSRNOG00000056386		LOC108351370	0.698979	0.590968	1.10437	0.491735	1.20968	1.15688
ENSRNOG00000050801		AABR07000629.3	0.00405117	0.0360542	0	0.00950005	0.00667722	0.0162548
ENSRNOG00000012111		Poli	2.35241	2.83034	2.79574	2.88956	2.39797	2.19525
ENSRNOG00000015972		Ano5	0	0	0	0	0	0
ENSRNOG00000058380		RF00026	0	0	0	0.143846	0	0
ENSRNOG00000045658		AABR07044301.1	0	0	0	0	0	0
ENSRNOG00000057484		AABR07001573.1	0	0	0	0	0	0.0589236
ENSRNOG00000049243		AABR07065656.3	0	0	0	0	0	0
ENSRNOG00000023807		Ccnyl1	2.87378	3.72284	3.0453	3.22257	3.11533	3.41475
ENSRNOG00000052293		RF00067	0.421513	0.25009	0.130584	0	0.926328	0.140939
ENSRNOG00000059323		RF00405	0	0	0	0	0	0
ENSRNOG00000052582		AABR07070060.1	0	0	0	0	0	0
ENSRNOG00000049074		AABR07017958.1	0	0	0	0	0	0
ENSRNOG00000047884		AABR07001923.1	2.38318	2.72272	3.06997	1.79355	1.80871	1.75678
ENSRNOG00000052929		AABR07048308.3	0	0	0	0	0	0
ENSRNOG00000052432		RF00560	0	0	0	0	0	0
ENSRNOG00000031100		Klhl1	0.138477	0.0890071	0.16445	0.0721624	0.0507202	0.138905
ENSRNOG00000000604		Hdac2	96.908	96.3314	90.0745	91.2062	91.2797	99.0369
ENSRNOG00000043915		RF00001	1.89042	0.186936	0.390432	1.80606	0.173102	0.632089
ENSRNOG00000006200		St18	77.8716	83.4726	78.0193	93.002	86.4278	87.5147
ENSRNOG00000002695		Tfb2m	4.53719	4.13646	4.15139	5.44178	3.17537	3.68336
ENSRNOG00000004359		Wars	81.049	78.7322	80.8917	72.7864	72.3057	70.5826
ENSRNOG00000001589		Evx2	0	0	0	0	0	0
ENSRNOG00000032996		Vom1r19	0	0	0	0	0	0
ENSRNOG00000051785		Olr728	0	0	0	0	0	0
ENSRNOG00000001581		Hoxd10	0	0	0	0	0	0
ENSRNOG00000016519		Kdm1b	7.5023	7.41675	7.5843	7.67857	7.53265	7.67939
ENSRNOG00000032825		LOC100362027	111.281	121.558	70.1368	115.051	128.435	102.892
ENSRNOG00000021424		Cd300lf	9.46979	8.21482	11.1648	14.1614	13.9562	14.7513
ENSRNOG00000005802		Usp24	9.4187	9.22184	9.85131	10.0597	9.19527	9.60946
ENSRNOG00000047289		AABR07030386.1	0	0	0	0	0	0
ENSRNOG00000016829		Isoc2b	0.0995912	0.141813	0.203631	0.0778476	0.180563	0.199798
ENSRNOG00000021106		Gramd1a	16.5931	17.7845	16.8339	16.303	16.1963	16.7754
ENSRNOG00000036831		Gtsf1	0	0	0	0	0	0
ENSRNOG00000056723		LOC108351063	0.00960935	0.0684164	0.00893087	0.0375568	0.0395958	0.0578344
ENSRNOG00000016089		Taar6	0	0	0	0	0	0
ENSRNOG00000001980		Ugt2b35	0	0.0457236	0.0119372	0.311237	0.222284	0.257677
ENSRNOG00000033484		AABR07039377.1	0	0	0	0	0	0
ENSRNOG00000007235		Atp5mc1	482.095	480.447	414.467	433.079	512.768	476.037
ENSRNOG00000017462		Spata5	6.98683	7.67573	7.41841	6.2501	7.40385	7.47983
ENSRNOG00000059250		RF00204	0	0	0	0	0	0
ENSRNOG00000002671		Nme2	479.169	473.854	404.844	402.682	437.776	394.642
ENSRNOG00000061154		AABR07069821.1	0	0	0	0	0	0
ENSRNOG00000059873		RF00026	0	0	0	0	0	0
ENSRNOG00000061958		AC108572.5	0	0	0.176095	0	0	0
ENSRNOG00000027908		Actrt3	0.574344	0.977198	0.769288	1.91463	1.86545	2.16892
ENSRNOG00000031344		AABR07048770.1	0	0	0	0	0	0
ENSRNOG00000016534		Fam171a1	16.9313	18.1278	19.2219	21.0449	20.162	21.8177
ENSRNOG00000061977		AABR07021405.3	0	0	0	0	0	0
ENSRNOG00000018051		Farp2	2.73538	2.57584	2.94506	2.81199	2.72256	2.98537
ENSRNOG00000006888		Gcfc2	6.37606	5.5957	5.03549	6.14188	5.68582	6.32309
ENSRNOG00000032844		RT1-Da	0.0216837	0.0385957	0.0201527	0.033899	0.0893487	0.174006
ENSRNOG00000028913		AABR07028872.1	0.310037	0.867191	0.699784	0.588558	0.51101	0.755276
ENSRNOG00000049651		AABR07041532.1	0	0	0	0	0	0
ENSRNOG00000060118		RF00026	0	0	0	0	0	0
ENSRNOG00000041899		AC135310.2	0.263223	0.234261	0	0.823017	1.7354	0.264037
ENSRNOG00000007333		Wdr20	9.09242	9.91782	9.25462	10.5491	10.081	10.4575
ENSRNOG00000003164		Pla2g10	0	0.0417286	0	0	0	0.0235163
ENSRNOG00000037196		Spag17	0	0	0	0	0	0
ENSRNOG00000056475		RF00588	0	0	0	0	0	0
ENSRNOG00000058033		RF00443	0.805994	1.29116	0.599268	0	0.132846	1.13188
ENSRNOG00000060271		Vom1r11	0	0	0	0	0	0
ENSRNOG00000050329		AABR07065013.1	0	0	0	0	0	0
ENSRNOG00000044867		RF00001	0	0	0	0	0	0
ENSRNOG00000033507		AABR07004684.1	0	0	0	0	0	0
ENSRNOG00000056794		AABR07008424.1	0	0	0.0947372	0.0199198	0	0
ENSRNOG00000054902		Trpc1	4.29725	4.57122	4.3625	4.24153	4.66879	4.60641
ENSRNOG00000047530		AABR07052795.3	0	0	0	0	0	0
ENSRNOG00000048632		AABR07054721.1	0	0	0	0	0	0
ENSRNOG00000053230		Fopnl	49.3355	54.6041	47.6319	45.2	49.9861	46.6925
ENSRNOG00000001059		Usp42	9.3162	9.17818	10.2469	8.21582	7.43659	8.67986
ENSRNOG00000049262		AABR07003935.10	0	0	0	0	0	0
ENSRNOG00000009571		Wipf3	0.554257	0.74288	0.608217	0.401928	0.407239	0.375113
ENSRNOG00000056335		AC113635.2	0	0	0	0	0	0
ENSRNOG00000056906		RF00406	0	0	0	0	0	0
ENSRNOG00000014139		Sclt1	7.19782	7.87262	7.9947	6.39535	7.01283	6.56217
ENSRNOG00000059813		RF00003	0	0	0	0	0	0
ENSRNOG00000053746		Olr1668	0	0	0	0	0	0
ENSRNOG00000058266		AABR07054025.2	0	0	0	0	0	0
ENSRNOG00000017249		Zfp366	0	0	0	0	0	0
ENSRNOG00000033015		AC105604.1	11.0298	10.1764	12.5081	11.3505	9.84027	10.6071
ENSRNOG00000005628		Hoxa1	0	0	0	0	0	0
ENSRNOG00000018824		Slc7a5	56.5689	58.2386	59.5944	49.906	54.9496	54.0535
ENSRNOG00000049007		LOC100911313	3.08326	0.371371	3.03793	0.398663	2.88484	2.86026
ENSRNOG00000001314		Fam20c	136.227	130.501	136.171	154.257	153.916	159.553
ENSRNOG00000051782		AABR07004061.1	0	0	0	0	0	0
ENSRNOG00000059750		AC141102.1	0	0.0261024	0.0272587	0	0.0241708	0
ENSRNOG00000019308		Arrb2	15.532	17.3899	19.1566	15.6832	16.7757	19.0627
ENSRNOG00000050382		AABR07043861.1	0	0	0	0	0	0
ENSRNOG00000060745		Nlrp12	0	0	0	0	0	0
ENSRNOG00000004257		Ctps2	23.394	23.0371	23.4905	23.4131	23.5111	21.9937
ENSRNOG00000053376		AABR07053767.1	0	0	0	0	0	0
ENSRNOG00000039871		RGD1306063	14.8871	19.2848	14.956	16.5132	15.2286	16.8057
ENSRNOG00000055381		AABR07043652.1	0	0	0	0	0	0
ENSRNOG00000053677		AABR07030674.1	0	0	0	0	0	0
ENSRNOG00000057098		RF00619	0	0	0	0	0	0
ENSRNOG00000020434		Ascl2	0.582038	0.506225	0.307354	0.206801	0.425156	0.265381
ENSRNOG00000047520		AABR07048475.1	0	0	0	0	0	0
ENSRNOG00000016695		Mmp2	0.00677129	0.024105	0.0188796	0.116444	0.0892847	0.0339612
ENSRNOG00000028556		Usp30	18.8926	18.7399	19.0578	25.1016	23.4347	25.5647
ENSRNOG00000011461		Ap3m1	44.1507	44.8777	43.414	46.4733	43.9768	43.2503
ENSRNOG00000006884		RGD1563263	0.0483596	0.172155	0.0449451	0.0378013	0	0.194037
ENSRNOG00000017297		Cab39	38.2705	38.1349	39.0354	35.2675	35.2643	35.0515
ENSRNOG00000054036		RF00560	0	0	0	0	0	0
ENSRNOG00000057201		AABR07035782.1	0.0119854	0	0	0.103055	0.128405	0.0120224
ENSRNOG00000008130		Rergl	0	0	0	0	0	0
ENSRNOG00000056647		Ascc1	34.3637	33.8104	31.4558	35.0705	34.2857	33.5007
ENSRNOG00000000111		Coprs	29.7604	32.8895	25.9086	24.2346	28.4066	25.658
ENSRNOG00000020405		Ins2	14406.7	13680.6	11042.8	10768.3	9039.81	8395.02
ENSRNOG00000049202		RF00001	0	0	0	0	0	0
ENSRNOG00000054713		AABR07059009.1	0	0	0.399856	0	0	0.0719274
ENSRNOG00000058706		RF00003	0	0	0	0	0	0
ENSRNOG00000059742		RF00026	0	0	0	0	0	0
ENSRNOG00000030904		Cpb1	0	0	0	0	0	0
ENSRNOG00000020298		Bag3	84.3448	79.2313	82.5576	81.5142	71.4245	73.4837
ENSRNOG00000039955		Samd3	0	0	0	0	0	0
ENSRNOG00000055916		LOC102552651	0	0	0	0	0	0
ENSRNOG00000000655		Ptprc	0	0	0	0	0	0
ENSRNOG00000030170		Krt10	6.46263	5.81745	6.60597	5.74615	5.90122	5.50651
ENSRNOG00000027806		Olr1509	0	0	0	0	0	0
ENSRNOG00000004834		Llgl2	47.2833	47.7442	41.4759	45.849	46.315	46.2009
ENSRNOG00000016999		Grp	0	0	0	0	0	0
ENSRNOG00000049797		NEWGENE_1311658	0	0	0	0	0	0
ENSRNOG00000029682		Clic1	152.127	161.886	146.234	149.37	156.529	141.812
ENSRNOG00000061431		AABR07061134.1	0	0	0	0	0	0
ENSRNOG00000015331		Gdf3	0	0	0	0	0	0
ENSRNOG00000004581		Zdhhc9	19.2811	19.7471	19.3264	23.1493	20.4322	22.2006
ENSRNOG00000023318		Tigd3	10.004	9.45169	11.8201	9.79784	8.709	8.96961
ENSRNOG00000059189		AABR07050879.1	0	0	0	0	0	0
ENSRNOG00000051764		AABR07049474.1	0	0	0	0	0	0
ENSRNOG00000059889		AC120291.4	0	0	0	0	0	0
ENSRNOG00000030870		LOC102550396	0	0	0	0	0	0.231766
ENSRNOG00000046057		Pnmt	0.0331389	0	0.030799	0	0	0
ENSRNOG00000056565		AABR07059002.1	0.0125081	0	0	0.0488859	0.00515401	0.00627337
ENSRNOG00000016321		Entpd4	17.7545	19.1898	16.2395	15.9159	15.6965	16.6811
ENSRNOG00000051917		AC098563.1	0	0	0	0	0	0
ENSRNOG00000008555		Rps20	1096.47	1129.99	864.653	922.959	1157.16	880.633
ENSRNOG00000053213		LOC103690198	0	0	0	0	0	0
ENSRNOG00000018580		Klk8	0.126883	0.0501875	0.0131026	0.0440802	0	0
ENSRNOG00000009642		Cct4	199.402	193.802	190.525	183.923	197.149	189.915
ENSRNOG00000024569		Gimap9	0	0	0	0	0	0
ENSRNOG00000018533		Iffo1	12.1507	12.4288	11.9934	10.6011	10.6926	11.3528
ENSRNOG00000021931		Uba6	7.76434	7.31867	8.01956	6.94291	6.67529	7.12768
ENSRNOG00000018417		Naa35	54.179	54.2715	51.6163	52.6463	52.051	52.55
ENSRNOG00000058905		RF00560	0	0	0	0	0	0
ENSRNOG00000004026		Atp2b1	54.3076	56.6305	60.8693	74.6322	67.1209	71.6494
ENSRNOG00000048332		AABR07013073.1	0	0	0	0	0	0
ENSRNOG00000004471		Polr3h	34.1135	34.3979	36.3847	38.7154	41.2281	35.6498
ENSRNOG00000051804		RF00560	0	0	0	0	0	0
ENSRNOG00000057015		RF00100	0	0	0	0	0	0
ENSRNOG00000057636		RF00015	0	0	0	0	0	0.140939
ENSRNOG00000028266		Lrrc55	0	0	0	0.0544238	0	0
ENSRNOG00000019670		Wdr3	14.5174	15.6565	15.1358	14.0981	12.8603	13.7881
ENSRNOG00000057396		AABR07005581.1	0.00405354	0	0	0	0.00334056	0
ENSRNOG00000056037		AABR07034636.1	0	0	0	0	0	0
ENSRNOG00000053269		Tmem106c	32.9533	34.9496	31.3311	31.9863	29.5948	26.1818
ENSRNOG00000042189		Rab31	4.75572	4.70826	4.89371	5.22382	4.97462	4.77667
ENSRNOG00000060758		AABR07042654.2	0	0	0	0	0	0
ENSRNOG00000031689		Trim15	1.06565	0.974033	1.37854	1.24949	1.23425	1.67565
ENSRNOG00000000540		Btbd9	13.5899	13.7805	14.8064	14.3163	16.2337	16.4502
ENSRNOG00000020142		Gdf1	0	0	0	0	0	0
ENSRNOG00000006589		LOC103694877	8.42541	6.59432	4.88713	6.67932	8.22383	6.47346
ENSRNOG00000022491		Wdr76	4.9511	4.63408	5.20127	5.13989	4.22696	5.12266
ENSRNOG00000022507		Twf1	50.3803	48.662	49.8963	49.2558	50.4393	45.9855
ENSRNOG00000051816		Tigar	26.7108	27.3366	28.904	28.0646	25.9396	26.4162
ENSRNOG00000052678		AABR07043940.1	0	0	0	0	0	0
ENSRNOG00000013793		C1qtnf9	0	0	0	0.0290001	0	0
ENSRNOG00000058382		Olr865	0	0	0	0	0	0
ENSRNOG00000019859		Pla2g15	3.91186	3.48145	3.74905	4.5539	4.83885	4.25287
ENSRNOG00000037827		RGD1561552	0	0	0	0	0	0
ENSRNOG00000007632		Mss51	0.575811	1.03656	0.948684	0.654684	0.744152	0.6301
ENSRNOG00000053180		AABR07001003.1	0	0	0	0	0	0
ENSRNOG00000009078		Mrpl37	64.2718	61.9499	59.0741	64.8852	68.057	63.1179
ENSRNOG00000054173		LOC102548428	0	0	0.275599	0	0.0610947	0.408999
ENSRNOG00000034150		AABR07041778.1	1.35617	0.402318	1.8206	0.706721	0.620908	0.869123
ENSRNOG00000056533		RF00026	0	0	0	0	0	0
ENSRNOG00000059003		RF00026	0	0	0	0	0	0
ENSRNOG00000051712		AC095852.2	0.371333	0.165238	1.03534	0.29026	0	0.186241
ENSRNOG00000025781		Sec31b	0.977049	0.988662	1.31441	1.09154	0.87873	0.832389
ENSRNOG00000033573		Sgk2	0.415515	0.369797	1.00055	0.930098	1.2452	0.606254
ENSRNOG00000058388		Zfp36	8.36605	8.12985	9.89784	10.5852	10.6965	11.6727
ENSRNOG00000046191		Cgas	0.0159468	0.0141922	0	0	0.0262839	0
ENSRNOG00000022368		Ddx49	30.4832	30.6835	27.9414	28.4816	30.1092	31.8881
ENSRNOG00000059740		Fthl17c	0	0	0	0	0	0
ENSRNOG00000019730		Inppl1	56.4771	54.8359	57.9497	63.2161	58.8073	62.3538
ENSRNOG00000051288		AABR07033653.2	0	0	0	0	0	0
ENSRNOG00000011624		Kcnq2	19.5894	20.9056	20.4233	19.0497	18.2251	18.6266
ENSRNOG00000033061		LOC108348135	0	0	0	0	0	0
ENSRNOG00000023476		Slc16a5	0.00748278	0.00665946	0.00695444	0	0.0308332	0
ENSRNOG00000022837		Slc25a40	12.1808	13.6857	11.5546	10.7708	11.6239	10.4963
ENSRNOG00000000847		Csnk2b	247.958	246.732	235.498	254.999	256.95	251.605
ENSRNOG00000000250		Jmjd6	27.8078	25.9681	24.3883	24.5397	24.006	25.8435
ENSRNOG00000015589		Smyd5	7.57031	7.59853	6.95644	6.99273	6.84076	6.21391
ENSRNOG00000058953		AABR07022369.1	0	0	0	0	0	0
ENSRNOG00000007981		Klhl23	10.5639	10.3224	10.6295	14.1281	16.1138	15.3911
ENSRNOG00000018895		Mchr1	0	0	0	0	0	0
ENSRNOG00000039649		Lnp1	0.107558	0.095724	0.133285	0	0.206827	0
ENSRNOG00000055003		AABR07058815.1	0.175482	0.156174	0.163092	0.0685847	0.180771	0.176025
ENSRNOG00000049378		AABR07062583.1	5.00375	5.37411	6.08643	5.65088	4.92968	4.52868
ENSRNOG00000017783		Sfrp1	0	0	0	0	0	0
ENSRNOG00000028628		LOC100911196	10.7439	10.1786	10.8301	9.7323	8.62243	9.34717
ENSRNOG00000015396		Sptan1	61.8312	63.2177	73.5076	63.2584	58.205	64.737
ENSRNOG00000030600		Olr1448	0	0	0	0	0	0
ENSRNOG00000011047		Tmem185a	57.9285	57.3611	62.5742	54.7804	55.3313	54.096
ENSRNOG00000015280		Actr8	37.4789	35.905	37.1191	37.2019	36.36	37.5441
ENSRNOG00000022707		Pmp2	0	0	0	0	0.0127224	0
ENSRNOG00000017404		Pcmtd2	22.7703	23.4633	22.6119	20.7868	19.0552	20.1474
ENSRNOG00000046048		AABR07024825.1	0	0.0536424	0	0	0.074509	0
ENSRNOG00000056498		AABR07070265.1	0	0	0	0	0	0
ENSRNOG00000054947		RF00003	0.756169	0.897291	0.11713	0.295538	0.519305	0.252836
ENSRNOG00000022964		Rnf222	0	0	0	0	0	0.0466122
ENSRNOG00000009846		Frg1	29.5385	25.9558	30.2311	26.7113	28.4078	28.6365
ENSRNOG00000008055		Ccne2	22.8624	22.6763	23.6105	21.3291	22.9117	22.6919
ENSRNOG00000016385		Gabrd	1.64687	1.54824	2.12342	9.61858	9.22324	8.87639
ENSRNOG00000059820		RF00394	0	0	0.137067	0	0	0
ENSRNOG00000026805		Csf2	0	0	0	0	0	0
ENSRNOG00000031763		Olr427	0	0	0	0	0	0
ENSRNOG00000019387		Ifi30	18.9342	16.5578	17.9339	21.5183	21.5333	21.949
ENSRNOG00000030743		Myog	0	0	0	0	0	0
ENSRNOG00000051109		AC095947.5	0	0	0	0	0	0
ENSRNOG00000055354		RF00026	0	0	0	0	0	0
ENSRNOG00000039496		Plp2	65.0344	61.0355	59.8629	64.6222	66.3479	68.0701
ENSRNOG00000026745		Acsl6	13.2383	13.5242	12.6191	13.0821	11.0517	12.3713
ENSRNOG00000032317		AABR07018164.1	0	0	0	0	0	0
ENSRNOG00000024030		Gpr35	0	0	0	0	0	0
ENSRNOG00000027498		Engase	4.25451	4.54922	4.06033	3.73981	3.96426	4.26246
ENSRNOG00000016731		Tpm2	0.405663	0.156969	0.458981	0.840992	0.886651	0.937679
ENSRNOG00000052243		AC243568.1	0	0	0	0	0	0
ENSRNOG00000056955		Bicdl1	120.184	123.209	125.767	128.648	122.838	127.393
ENSRNOG00000026115		Zfp646	10.5505	10.5654	11.4381	10.2806	9.39422	10.261
ENSRNOG00000019504		AABR07026536.1	0.213531	0.190037	0.282416	0.436537	0.40158	0.54097
ENSRNOG00000013631		Slc31a2	16.0348	17.4371	15.1983	17.1663	16.5933	15.8717
ENSRNOG00000060920		AABR07056802.1	0.0393838	0	0	0	0	0
ENSRNOG00000048212		Krtap26-1	0	0	0	0	0	0
ENSRNOG00000026225		Tas2r138	0	0	0	0	0	0
ENSRNOG00000060825		Ccm2	26.1469	24.2058	23.0379	20.9924	24.2645	24.1893
ENSRNOG00000008663		Nat10	5.14444	5.84364	5.65459	5.30675	3.85237	4.77967
ENSRNOG00000018997		Myh7b	0.334242	0.367279	0.475473	0.487877	0.564958	0.468702
ENSRNOG00000001169		Slc37a1	32.0256	31.6968	32.4942	34.6609	30.6316	33.2989
ENSRNOG00000001143		Cit	8.04627	8.48597	10.0418	9.09284	7.93618	9.25605
ENSRNOG00000051778		AABR07007978.1	0	0	0	0	0	0
ENSRNOG00000054433		Rnase1l2	0	0	0	0	0	0
ENSRNOG00000048378		Vrtn	0	0	0	0.0364616	0	0
ENSRNOG00000055735		LOC100911127	0	0	0	0	0	0
ENSRNOG00000058887		RF00066	0	0	0	0	0	0
ENSRNOG00000008748		Pex2	37.3483	41.5858	36.7714	31.7981	36.3437	34.4822
ENSRNOG00000023227		AABR07052585.2	0	0	0	0.0491446	0	0
ENSRNOG00000022289		Aip	77.141	76.9451	64.2047	67.4724	72.2145	66.8353
ENSRNOG00000052265		AABR07063852.1	0.143659	0	0	0	0.0295977	0
ENSRNOG00000061133		RF00560	0	0	0	0	0	0
ENSRNOG00000039969		Dsc2	14.3327	13.6012	16.362	12.7102	12.8972	13.3228
ENSRNOG00000017540		Spata3	0	0	0	0	0	0
ENSRNOG00000048403		AABR07005664.1	0	0	0	0	0	0
ENSRNOG00000054892		RF00181	0	0	0	0	0	0
ENSRNOG00000055967		RF00026	0	0	0	0	0	0
ENSRNOG00000012787		Tmem164	63.8144	69.0833	71.0241	70.6792	56.3002	60.7157
ENSRNOG00000062012		AABR07044370.1	0	0	0	0	0	0
ENSRNOG00000041423		AABR07007689.1	0	0	0	0	0	0
ENSRNOG00000032570		Smc1b	0	0	0	0	0	0
ENSRNOG00000061537		AABR07032439.1	0.183617	0.0204267	0	0.0717641	0	0.161162
ENSRNOG00000007834		Cand1	70.6297	70.7964	73.2622	75.2539	68.6226	70.1485
ENSRNOG00000049392		Sowahd	0.0127496	0	0	0	0	0
ENSRNOG00000051026		AABR07048420.2	0.0355464	0.0421804	0.0880975	0.0185237	0.0195294	0.0475417
ENSRNOG00000055377		AABR07010550.1	0	0	0	0	0	0
ENSRNOG00000003187		Armcx5	7.77358	8.03692	8.43829	6.47703	7.56284	6.97746
ENSRNOG00000050394		AABR07017658.2	0	0	0	0	0	0
ENSRNOG00000060701		AC130232.2	4.59302	5.40867	6.1428	4.85995	4.59297	4.60723
ENSRNOG00000052885		LOC103690271	0	0	0	0	0	0
ENSRNOG00000012020		Nsun4	0.0892474	0.122752	0.196054	0.202944	0.147099	0.260432
ENSRNOG00000056943		AC107527.1	0	0	0	0	0	0
ENSRNOG00000052944		AABR07036024.1	0	0	0	0	0	0
ENSRNOG00000026328		Gpr137c	0.049044	0.116394	0.106356	0.051115	0.202088	0.0327971
ENSRNOG00000032215		Cdyl	8.31595	7.66376	7.81732	8.26504	8.43901	8.80987
ENSRNOG00000058376		Snora19	0	0	0	0	0	0
ENSRNOG00000048224		AABR07035224.1	0	0	0	0	0	0
ENSRNOG00000052507		AC241806.1	0	0	0	0	0	0
ENSRNOG00000010749		Olfr286	0.944235	1.3942	1.27646	0.838729	1.02575	0.774945
ENSRNOG00000039251		LOC103694201	0	0	0	0	0	0
ENSRNOG00000054158		AABR07035835.1	0	0	0	0	0	0
ENSRNOG00000050812		AABR07066532.1	0	0	0	0	0.659118	0
ENSRNOG00000058092		AABR07014512.2	0	0	0	0	0	0
ENSRNOG00000058822		AABR07030995.1	0.0577629	0.0881268	0.107369	0.0774027	0.00680043	0.0413868
ENSRNOG00000053093		Vom1r99	0	0	0	0	0	0
ENSRNOG00000042975		Tmem45a	0.869187	0.597744	0.979171	0.864715	0.846543	1.09645
ENSRNOG00000031408		AC097129.1	0	0	0	0.0189117	0.0299076	0.109209
ENSRNOG00000059608		RF00108	1.56519	1.79096	2.90935	1.7478	1.28989	1.34574
ENSRNOG00000018362		Olr852	0	0	0	0	0	0
ENSRNOG00000005564		Ubn2	6.20048	6.09148	7.01676	6.05125	5.98	6.51816
ENSRNOG00000048483		RF00001	0	0	0	0	0	0
ENSRNOG00000054609		AABR07002683.1	0.970956	0.997856	0.9024	0.957746	0.914485	0.730469
ENSRNOG00000006462		Ero1a	21.2046	21.9176	19.8897	21.5636	21.3901	23.2372
ENSRNOG00000049021		Mir3473	0	0	0	0	0	0
ENSRNOG00000057083		RF00004	0	0	0	0	0	0
ENSRNOG00000062226		AABR07037407.1	0	0	0	0	0	0
ENSRNOG00000051277		AABR07067401.2	0	0	0	0	0	0
ENSRNOG00000059584		RF00026	0	0	0	0	0	0
ENSRNOG00000012750		Pabpc1l	0.0342581	0.0101629	0.0318392	0.00892618	0.0282324	0
ENSRNOG00000029868		LOC680288	0	0	0	0	0	0
ENSRNOG00000030162		AC114393.1	0	0	0	0	0	0
ENSRNOG00000006119		Slc7a15	0.377305	0.42737	0.581784	1.28026	0.720817	1.0666
ENSRNOG00000005659		Aurkb	36.8919	36.1271	36.8976	40.0298	41.0486	41.1737
ENSRNOG00000055579		Tmbim6	554.187	529.711	493.512	558.755	602.36	598.011
ENSRNOG00000054615		RF00100	0	0	0	0	0	0
ENSRNOG00000031368		LOC499235	2.06647	2.08688	2.05282	2.45681	2.1313	2.34593
ENSRNOG00000001033		Nufip1	8.51776	8.12203	8.98667	7.53282	8.12086	8.29345
ENSRNOG00000020544		Sdr39u1	18.2397	19.2141	17.9017	14.7123	14.973	15.5623
ENSRNOG00000030572		Smc5	28.1679	28.696	31.6254	26.2056	24.9434	27.79
ENSRNOG00000030729		C4b	0.00782194	0.0208839	0.00363483	0	0.0128923	0.0274615
ENSRNOG00000058949		AABR07017540.1	0	0	0	0	0	0
ENSRNOG00000016890		Tppp3	3.55446	2.87923	3.10567	5.39046	4.50791	5.0813
ENSRNOG00000054889		Wdr72	0	0.00537203	0	0	0	0
ENSRNOG00000048164		Acad8	16.3026	15.2874	14.1039	9.98157	9.08154	10.6657
ENSRNOG00000029321		Ccser1	1.76023	2.15611	1.84117	1.82963	1.85097	2.32891
ENSRNOG00000015347		Trim45	2.65999	2.21536	2.27173	1.91767	2.05882	1.81186
ENSRNOG00000050625		Adig	0	0	0	0	0	0
ENSRNOG00000000531		Ccdc167	26.1131	26.0637	25.818	20.6082	21.3132	21.4314
ENSRNOG00000056415		AABR07044308.3	0	0	0	0	0	0
ENSRNOG00000062261		AC111804.2	0	0	0	0	0	0
ENSRNOG00000059920		AC135285.4	0	0.0562512	0	0.148218	0	0.0317005
ENSRNOG00000057008		AABR07010985.1	0	0.0300067	0	0.0065888	0.0208396	0
ENSRNOG00000057402		RF00026	0	0	0	0	0	0
ENSRNOG00000059235		AABR07018837.1	0	0	0	0	0	0
ENSRNOG00000045733		LOC298139	0	0	0	0	0.0101946	0
ENSRNOG00000022251		AABR07039336.3	0.0442753	0.0788075	0.178313	0.0576813	0.121626	0.0148041
ENSRNOG00000022482		Trappc11	26.7433	27.0593	26.9678	25.8493	25.0415	26.5129
ENSRNOG00000001547		Agps	11.069	10.9701	11.5259	11.5168	11.4159	12.9034
ENSRNOG00000022402		Luzp1	3.82383	3.96015	4.67664	4.03587	3.71664	3.98371
ENSRNOG00000045557		AC096003.1	0	0	0	0	0	0
ENSRNOG00000013419		Hykk	0	0	0	0	0	0
ENSRNOG00000042612		Rnase12	0.0474763	0	0	0	0.0391257	0
ENSRNOG00000046822		AABR07018062.2	0	0	0	0	0	0
ENSRNOG00000048981		Ahsa1	37.7323	37.7051	36.1519	41.694	41.8386	42.3777
ENSRNOG00000003836		Fam47a	0	0	0	0	0	0
ENSRNOG00000055092		AABR07015966.1	0	0	0	0	0	0
ENSRNOG00000054005		RF00026	0	0	0	0	0	0
ENSRNOG00000007518		Nckap1	45.6696	44.3832	49.3229	43.4149	42.4928	46.6117
ENSRNOG00000061243		AABR07027494.1	0	0	0	0	0	0
ENSRNOG00000058872		RF00015	0	0	0	0	0	0
ENSRNOG00000033915		Gpt	4.24258	4.85001	4.03189	4.2318	3.50621	3.95601
ENSRNOG00000008851		Slc35b4	14.4449	15.9417	15.5753	15.4423	16.2286	14.3456
ENSRNOG00000027655		Clec4b2	0.017758	0	0	0.0138809	0.0292691	0.106878
ENSRNOG00000032882		AY172581.19	0	0	0	0	0	0
ENSRNOG00000061982		AABR07024473.2	0	0	0	0	0	0
ENSRNOG00000046441		AABR07062102.1	0	0	0	0	0	0
ENSRNOG00000030386		Cldn18	0	0	0	0	0	0
ENSRNOG00000048036		Ncan	0.39565	0.4381	0.577226	0.399172	0.363973	0.526088
ENSRNOG00000025998		AABR07045485.1	0	0	0	0	0	0
ENSRNOG00000026232		Olr1158	0	0	0	0	0	0
ENSRNOG00000012053		S100a16	0	0	0	0	0	0
ENSRNOG00000049472		AABR07032348.1	0	0	0	0	0	0
ENSRNOG00000016581		Serpinb1a	0	0	0	0.0129933	0	0
ENSRNOG00000059341		Olr954	0	0	0	0	0	0
ENSRNOG00000047331		LOC687896	0	0	0	0	0	0
ENSRNOG00000057212		AABR07043271.1	6.93155	5.79119	4.53579	4.20186	3.67223	4.32788
ENSRNOG00000025693		Tdrd6	0	0.00262097	0.0164224	0.00230202	0	0
ENSRNOG00000050035		Sall4	0	0	0	0	0	0
ENSRNOG00000056163		AABR07036638.1	0	0	0	0	0	0
ENSRNOG00000043348		Rpl39	301.336	336.026	187.155	372.143	435.547	286.468
ENSRNOG00000020412		Sf3b2	103.373	102.923	111.397	105.877	103.758	108.358
ENSRNOG00000056602		RF00100	0	0	0	0	0	0
ENSRNOG00000051964		LOC108348190	0.333741	0.765398	0.560704	0.481617	0.370245	0.334773
ENSRNOG00000015910		Lmntd1	0	0	0	0	0	0
ENSRNOG00000013809		Kbtbd2	26.4384	27.5282	28.8827	27.2551	27.8166	26.8542
ENSRNOG00000060721		RF00181	0	0	0	0	0	0
ENSRNOG00000036287		AABR07006742.1	0	0	0	0	0	0
ENSRNOG00000054797		AABR07065261.1	0	0	0	0	0	0
ENSRNOG00000018719		Cir1	13.2751	13.5805	13.9663	11.937	13.1397	11.8961
ENSRNOG00000014908		Sf3b5	200.908	212.021	191.662	164.144	185.114	176.656
ENSRNOG00000048343		Crtapl1	0.0994959	0.118065	0.154118	0	2.65119	3.19371
ENSRNOG00000058898		Nedd4	109.529	109.727	111.065	113.782	104.53	109.555
ENSRNOG00000049816		AABR07003102.1	0	0	0	0	0	0
ENSRNOG00000008552		P2rx3	1.07374	1.25237	1.21487	1.08433	1.24214	1.47846
ENSRNOG00000062196		AABR07040730.1	0	0	0	0	0	0
ENSRNOG00000051341		AABR07038849.1	10.3828	10.431	12.2716	12.9582	11.4567	11.611
ENSRNOG00000015430		Nlgn2	73.3985	74.9871	75.43	69.0805	60.8905	65.1277
ENSRNOG00000050469		LOC100912034	0	0	0	0	0	0
ENSRNOG00000051609		Vom1r86	0	0	0	0	0	0
ENSRNOG00000001645		Filip1l	0.126092	0.037406	0.0195315	0.0739218	0.0692757	0.0210803
ENSRNOG00000007214		Oma1	3.03043	2.18376	3.36294	2.28925	2.33899	1.87152
ENSRNOG00000048114		Echdc3	0.326617	0.169563	0.607112	0	0.201877	0
ENSRNOG00000009139		Fubp3	83.4953	85.7394	85.6072	82.0776	80.5952	83.0386
ENSRNOG00000060074		AABR07071753.1	0	0	0	0	0	0
ENSRNOG00000015257		Coro2b	25.3617	23.3465	26.6244	24.3186	22.1315	24.479
ENSRNOG00000001786		Snx4	38.74	41.6724	38.908	38.7011	41.0851	39.3763
ENSRNOG00000030449		Gsta4	3.34104	2.75934	3.42808	0.480534	0.903111	1.12606
ENSRNOG00000003784		Rilp	0.207758	0.403414	0.438837	0.177162	0.077825	0.170509
ENSRNOG00000015459		Heatr3	5.29843	5.09247	6.4136	5.64855	5.34806	5.74591
ENSRNOG00000009015		Nfx1	25.8994	25.7913	27.4736	24.5057	23.7859	23.8607
ENSRNOG00000052753		LOC100912611	0	0	0	0	0	0
ENSRNOG00000055033		AABR07056769.1	0	0	0	0	0	0
ENSRNOG00000026969		RGD1564836	0	0	0	0	0	0
ENSRNOG00000018262		Ampd3	0.00530611	0	0.00493146	0.0207382	0.00437282	0.010645
ENSRNOG00000046791		Sh3rf3	0.429476	0.87111	1.2253	0.601154	0.518557	0.350655
ENSRNOG00000061238		Wnt10b	0.688811	1.16806	0.882405	0.858568	0.728748	0.718952
ENSRNOG00000058756		RF00420	0	0	0	0	0	0
ENSRNOG00000027491		Vldlr	53.4441	55.5741	51.2316	53.4018	48.4673	51.7475
ENSRNOG00000057176		Olr1660	0	0	0	0	0	0
ENSRNOG00000053199		RF00026	0	0	0	0	0	0
ENSRNOG00000046959		Mnx1	54.386	57.5099	50.9296	42.1221	36.1168	36.9215
ENSRNOG00000033638		AABR07025743.1	0.0159346	0.0141813	0.0148095	0.0124556	0.0131319	0
ENSRNOG00000049097		Rpl7a	72.9636	46.5913	50.7863	49.4155	58.2832	39.0778
ENSRNOG00000020144		RGD1310127	12.454	12.6205	12.1802	11.957	10.3977	11.2996
ENSRNOG00000017873		Sct	10.6801	15.0718	11.534	11.1051	14.1484	11.7144
ENSRNOG00000051449		AABR07064867.1	0	0.370133	0.644213	0.433455	0.228494	1.11248
ENSRNOG00000057344		AABR07051733.2	0	0	0	0	0	0
ENSRNOG00000043331		Ankrd65	0	0	0	0	0	0
ENSRNOG00000056332		Miga1	11.7434	13.8664	14.2769	11.0078	9.708	11.2299
ENSRNOG00000045084		RF00001	0	0	0.19135	0	0	0
ENSRNOG00000049947		Olr666	0	0	0	0	0	0
ENSRNOG00000052853		RF00560	0	0	0	0	0	0
ENSRNOG00000013991		Creg2	2.27854	3.77817	2.71952	2.77471	3.12302	2.86299
ENSRNOG00000049571		Actl9	0	0	0.0280499	0	0	0
ENSRNOG00000033776		LOC100359668	1.50686	2.21275	2.13571	2.82688	2.17318	2.60737
ENSRNOG00000001627		Abi3bp	0.00828142	0.00737022	0.0307868	0.0776802	0.0614232	0.00830703
ENSRNOG00000056187		AC132752.1	0	0	0	0	0	0
ENSRNOG00000036841		Cbx5	64.346	59.7708	71.5959	64.6412	69.6218	71.6915
ENSRNOG00000060683		AABR07070161.6	0	0	0	0	0	0
ENSRNOG00000054406		RF00272	0	0	0	0	0	0
ENSRNOG00000027355		Wdr36	27.0354	27.7149	26.8426	29.9513	28.489	28.3382
ENSRNOG00000017429		Lat	0.80518	0.560807	0.780864	0.656751	0.461605	0.702321
ENSRNOG00000055692		RF00015	0	0	0	0	0	0
ENSRNOG00000023816		Aph1a	97.758	95.9574	91.1187	93.9265	88.5274	94.0072
ENSRNOG00000000801		Msl3l2	0	0	0	0	0.0226681	0.0137956
ENSRNOG00000008100		Rgs20	0.360601	0.374412	0.446853	0.355695	0.254721	0.439226
ENSRNOG00000060227		RF00026	0	0	0	0	0	0
ENSRNOG00000002828		Tob1	35.9497	36.1281	35.832	34.1843	36.6064	38.2928
ENSRNOG00000021316		Tmem98	58.806	61.8246	56.3831	77.1561	65.6351	67.5583
ENSRNOG00000058811		RF00026	0.199948	0.711794	0	0	0.494339	0
ENSRNOG00000061188		AABR07017528.1	0	0	0	0	0	0
ENSRNOG00000046594		Exoc7	0.0741909	0.0565952	0.0197007	0.0331388	0.0873449	0.0531573
ENSRNOG00000019164		Uba1	122.389	118.921	123.899	117.564	110.601	117.915
ENSRNOG00000053937		AABR07047189.1	0	0	0	0	0	0
ENSRNOG00000007377		Slit3	0.00361018	0	0	0.0169319	0.0119007	0
ENSRNOG00000060309		RF00026	0	0	0	0	0	0
ENSRNOG00000035357		RF00001	0	0	0	0	0	0
ENSRNOG00000003614		Mgat5	20.4392	18.8436	20.6479	20.2835	20.5632	19.4947
ENSRNOG00000013456		Ighmbp2	7.09892	7.06262	6.68887	6.74454	6.26885	6.30458
ENSRNOG00000052462		RF00560	0	0	0	0	0	0.165547
ENSRNOG00000011839		Mrps31	15.3364	14.8456	13.6101	13.7155	13.9993	14.4223
ENSRNOG00000015658		Sorbs1	9.32499	9.72525	9.43321	12.4535	10.5788	10.4649
ENSRNOG00000052052		AABR07028513.1	0	0	0	0	0	0
ENSRNOG00000050042		Myh8	0.00468664	0	0	0	0	0
ENSRNOG00000054267		AABR07017617.2	0	0	0	0	0	0
ENSRNOG00000001162		Tff2	0	0	0	0	0	0
ENSRNOG00000054312		AABR07004761.1	0	0	0	0	0	0
ENSRNOG00000003805		Rnft1	14.6468	14.8487	11.9293	11.9119	12.7882	13.2596
ENSRNOG00000000024		Hebp1	0.0587419	0.0348524	0.0545943	0.0918338	0.0161366	0.0196412
ENSRNOG00000055168		RF00600	0	0	0	0	0	0
ENSRNOG00000048107		AABR07035478.1	0	0	0	0	0	0
ENSRNOG00000039434		Olr1645	0.186221	0.0736582	0.0384605	0	0.0170518	0
ENSRNOG00000056099		RF00100	0	0	0	0	0	0
ENSRNOG00000005148		Scrt2	1.563	1.83454	1.45264	2.1779	1.73611	2.70394
ENSRNOG00000047275		AABR07037608.1	0	0	0	0	0	0
ENSRNOG00000047849		Olr768	0	0	0	0	0	0
ENSRNOG00000060296		LOC102556295	0	0	0	0	0	0
ENSRNOG00000017645		Mylpf	7.39618	7.21531	7.13834	7.42685	5.81395	6.42033
ENSRNOG00000029677		AY172581.6	0	0	0	0	0	0
ENSRNOG00000059962		AABR07025787.1	12.3382	11.5975	10.8228	12.6786	14.6236	12.9325
ENSRNOG00000056171		AC107505.1	0	0	0	0	0	0
ENSRNOG00000029197		Diablo	61.5161	64.4014	65.641	58.6873	61.1319	62.0771
ENSRNOG00000020246		Myl9	0.244864	0.268212	0.0700232	0.17668	0.155227	0.018894
ENSRNOG00000029001		RT1-S2	78.6758	68.6713	77.686	72.1857	103.733	92.0996
ENSRNOG00000024149		Prr18	0.605669	0.539028	0.708843	0.490969	0.720977	0.877561
ENSRNOG00000001106		Denr	138.845	153.014	141.528	135.539	135.418	145.869
ENSRNOG00000017146		Nfatc1	18.9018	17.089	19.8653	22.3032	16.9998	17.5696
ENSRNOG00000010744		Nrp1	9.04173	9.43359	9.12739	11.9952	10.9881	11.8294
ENSRNOG00000055965		RF00026	1.51234	0.672969	1.58125	0.443307	1.8695	1.13776
ENSRNOG00000053964		RF00181	0	0	0	0	0	0
ENSRNOG00000011096		Hmgb3	0.698174	0.974675	0.597986	0.781161	0.857418	0.425693
ENSRNOG00000055188		Tlx2	0	0	0	0	0	0
ENSRNOG00000019448		Lipf	0	0	0	0.0478076	0	0
ENSRNOG00000055145		AABR07052611.1	0.0294542	0	0	0	0.0242735	0
ENSRNOG00000003841		Kcnh1	3.58288	3.07779	3.64483	3.4706	3.58511	3.35403
ENSRNOG00000013963		Il6st	40.6805	40.8728	41.9753	40.9446	35.4416	38.1051
ENSRNOG00000058063		AABR07010160.2	0	0	0	0	0	0
ENSRNOG00000060366		LOC102549173	0.354167	0.495311	1.08153	0.711879	0.875617	0.60902
ENSRNOG00000059970		AABR07024869.1	0.198044	0.352507	0.0613536	0.412815	0.707244	0.529751
ENSRNOG00000058812		AABR07049886.3	0	0	0	0	0	0
ENSRNOG00000010239		Cnbp	258.743	256.061	246.806	253.332	272.826	258.272
ENSRNOG00000002771		Ereg	0	0	0	0	0	0
ENSRNOG00000055495		RF00105	0	0	0	0	0	0
ENSRNOG00000013671		Vom2r9	0	0	0	0	0	0
ENSRNOG00000061847		RF00026	0	0	0	0	0	0
ENSRNOG00000011376		Bbof1	0.461078	0.820693	0.728489	0.819937	0.569969	0.555005
ENSRNOG00000006314		Zbp1	0	0	0	0	0	0
ENSRNOG00000015145		Ppp6c	43.7615	45.9847	43.9733	43.5725	46.8053	42.3307
ENSRNOG00000050263		AABR07012426.1	0	0.0345918	0.0541862	0.0607648	0.0480479	0
ENSRNOG00000000441		Gpsm3	0.304156	0.128221	0.0297558	0.0500526	0.145118	0.240865
ENSRNOG00000055643		RF00272	0	0	0	0	0	0
ENSRNOG00000059373		M6pr	2.83016	2.59021	5.09277	3.70278	7.79108	2.6577
ENSRNOG00000032137		AABR07006487.1	0	0	0	0	0	0
ENSRNOG00000002412		Mapk7	0	0	0	0	0	0
ENSRNOG00000042530		LOC367830	0	0	0.0137457	0	0.0121885	0
ENSRNOG00000060559		RF01296	0.253593	0	0.471375	0.198227	0.313483	0.0635943
ENSRNOG00000060143		AABR07029573.3	0	0	0	0	0	0
ENSRNOG00000005126		Pqlc3	6.1881	6.80133	4.54201	6.30698	6.82059	5.61503
ENSRNOG00000004950		Ubxn2a	17.5563	15.8152	16.1924	16.7776	17.9752	15.7046
ENSRNOG00000003674		Pir	20.1207	22.3622	18.7768	19.9527	21.4667	22.1971
ENSRNOG00000001317		Zfp68	30.1477	29.4698	31.918	29.3289	29.1405	29.7512
ENSRNOG00000018457		Ptpa	77.0615	75.8009	75.8705	77.5193	78.0502	78.8997
ENSRNOG00000048259		Olr691	0	0	0	0	0	0
ENSRNOG00000043357		Zfp407	4.59943	4.54607	5.34644	4.9026	4.46644	4.42398
ENSRNOG00000001490		Pdcd2	28.3497	29.9142	27.2683	26.0016	28.456	24.6665
ENSRNOG00000038396		LOC100909677	0	0	0	0	0	0
ENSRNOG00000054012		AABR07060957.1	0	0	0	0	0	0
ENSRNOG00000007416		Clp1	10.1151	9.90438	8.6942	8.78017	8.74418	9.34897
ENSRNOG00000033051		Slc22a15	8.10763	8.2659	8.05505	9.32128	9.33092	9.8283
ENSRNOG00000054217		Runx3	0	0	0	0	0	0
ENSRNOG00000030800		Igdcc3	0.0852589	0.075878	0.158478	0.0866378	0.0843152	0.136836
ENSRNOG00000041443		Gm25317	0	0	0	0	0	0
ENSRNOG00000012086		AABR07026271.1	3.17302	3.9501	2.07131	4.04519	2.75501	3.59964
ENSRNOG00000011831		Nudt18	3.97589	4.36628	4.05771	3.67077	2.80672	3.49154
ENSRNOG00000012602		Recql	31.4695	30.4239	29.1186	30.7969	29.8061	30.5328
ENSRNOG00000017103		Prl3a1	0	0	0	0	0	0
ENSRNOG00000061477		RF00599	0	0	0	0	0	0
ENSRNOG00000033397		Adamts20	1.47882	1.30756	1.66892	1.26103	1.1831	1.44486
ENSRNOG00000058582		RF00026	0	0	0	0	0	0
ENSRNOG00000040652		RF00001	0	0	0	0	0	0
ENSRNOG00000019473		NEWGENE_1582994	0.410471	0.296382	0.0719791	0.145292	0.0702078	0.108762
ENSRNOG00000054690		RF00017	0	0	0	0	0	0
ENSRNOG00000018884		Ttc13	18.2183	17.3193	16.1869	16.2833	16.5117	15.9358
ENSRNOG00000056883		RF00066	0	0.289166	0	0	0	0
ENSRNOG00000051722		AABR07065772.3	0	0	0	0	0	0
ENSRNOG00000007957		Tspoap1	4.55845	4.97253	5.11951	4.29698	3.42556	4.36539
ENSRNOG00000057712		RF00181	0	0	0	0	0	0
ENSRNOG00000027722		H1fx	187.367	184.203	192.863	162.069	184.749	174.077
ENSRNOG00000021732		Hsf1	20.9669	21.388	21.175	19.8757	19.6846	20.7898
ENSRNOG00000001353		Ap4m1	23.894	24.5804	26.1658	22.9259	20.8866	24.2282
ENSRNOG00000054282		AABR07072203.1	0	0	0	0	0	0.133711
ENSRNOG00000003548		AABR07059162.1	0	0	0	0	0	0
ENSRNOG00000058986		RF00015	0	0	0	0	0	0
ENSRNOG00000016413		Pstpip1	0	0.0404075	0.0210987	0	0	0
ENSRNOG00000051530		RF00026	0	0	0	0	0	0
ENSRNOG00000049555		Olr917	0	0.019772	0	0	0.0183088	0
ENSRNOG00000052571		RF00026	0	0	0	0	0	0
ENSRNOG00000019902		Folr1	0	0	0	0	0	0
ENSRNOG00000049738		AABR07006232.1	0	0	0	0	0	0
ENSRNOG00000015716		Gp2	0	0	0	0	0.0282673	0.00860163
ENSRNOG00000010780		Dlc1	4.61445	5.46307	5.73654	8.21995	6.44734	6.81143
ENSRNOG00000011925		Fam83b	0.0351747	0.0882217	0.0297192	0.0124978	0.00527051	0.0352835
ENSRNOG00000026976		AABR07056369.1	0	0	0	0	0	0
ENSRNOG00000048580		Trip6	3.0363	3.11111	3.76874	3.29464	2.27177	3.90729
ENSRNOG00000060318		RF00026	0	0	0	0	0	0
ENSRNOG00000045763		AABR07004022.1	0	0	0	0	0	0
ENSRNOG00000028074		Lcn10	0	0	0	0	0	0
ENSRNOG00000047758		RGD1562932	0	0	0	0	0	0
ENSRNOG00000033979		Gm5471	58.7357	59.4701	59.618	49.3341	52.4635	53.7331
ENSRNOG00000047204		Gp6	0	0	0	0	0	0
ENSRNOG00000008917		Ehbp1	8.94531	8.52665	9.01649	8.07384	7.79952	7.43579
ENSRNOG00000046934		Olr1449	0	0	0	0	0	0
ENSRNOG00000018748		Slc16a11	7.54837	8.87418	6.86693	9.29279	7.65792	7.98569
ENSRNOG00000001644		Tmem30c	0.0164255	0	0.0152657	0.0128393	0	0.0164763
ENSRNOG00000025140		Zfat	5.39259	5.85558	5.94992	6.01967	6.21556	6.028
ENSRNOG00000060046		RF00392	0	0	0	0	0	0
ENSRNOG00000037082		Mybphl	0	0	0	0	0	0
ENSRNOG00000031959		AABR07026059.1	0	0	0	0	0	0
ENSRNOG00000053257		RF00009	0	0	0	0	0	0
ENSRNOG00000053015		Ccdc189	0.977585	1.29261	0.9475	1.48464	1.62279	1.55496
ENSRNOG00000061197		AABR07007793.1	0	0	0	0	0	0
ENSRNOG00000049551		AABR07043601.3	0	0	0	0	0	0
ENSRNOG00000059237		AABR07068851.1	0.0145011	0	0	0	0	0.014546
ENSRNOG00000005689		Yeats4	48.4626	49.2192	49.2307	40.9715	50.26	47.5616
ENSRNOG00000052163		AABR07008180.1	0	0	0	0	0	0
ENSRNOG00000048916		Vom1r24	0	0	0	0	0	0
ENSRNOG00000055485		LOC100363531	0.322397	0.143462	0.486905	0.0315011	0.0664228	0.28297
ENSRNOG00000009324		Wdr54	0	0	0	0	0	0
ENSRNOG00000030868		AABR07037307.1	0	0	0	0	0	0
ENSRNOG00000051420		Cables2	22.1376	22.6321	25.5135	26.7636	23.504	25.9143
ENSRNOG00000002322		RGD1310587	0	0	0	0	0	0
ENSRNOG00000055419		RF00100	0	0	0	0	0	0
ENSRNOG00000061733		LOC103690156	0.133299	0.14829	0.185831	0.14327	0.178511	0.0501417
ENSRNOG00000014530		Nav2	13.8482	13.661	17.4379	14.9465	11.8407	11.6613
ENSRNOG00000007546		Asns	99.1133	89.4593	97.7399	98.5389	110.463	107.565
ENSRNOG00000026514		Wdr93	0.259683	0.444444	0.436283	0.780719	0.666716	0.420786
ENSRNOG00000015623		Guca1b	1.03001	0.916684	1.11985	1.24568	0.688686	0.955223
ENSRNOG00000042648		AC106947.1	0	0	0	0	0	0
ENSRNOG00000061738		AABR07027141.1	0	0	0	0	0	0
ENSRNOG00000056706		AABR07066828.1	0	0	0	0	0	0
ENSRNOG00000059137		AABR07000173.1	0	0	0	0	0	0
ENSRNOG00000005630		AABR07060778.1	113.088	118.957	132.698	86.4778	110.874	90.6625
ENSRNOG00000057315		Kcnh3	3.97981	3.10354	3.14737	4.76043	4.75594	4.43007
ENSRNOG00000057235		AABR07067355.1	0.0983198	0.153128	0.296978	0.288202	0.0405132	0.024656
ENSRNOG00000061239		RF00026	0	0	0	0	0	0
ENSRNOG00000035637		Mir29b2	0	0	0	0	0	0
ENSRNOG00000049218		LOC100359924	0.0577629	0	0.0536844	0.0451516	0	0
ENSRNOG00000050586		AABR07034362.2	0	0	0	0	0	0
ENSRNOG00000052562		RF00421	0	0	0	0	0	0
ENSRNOG00000060990		AABR07000382.1	0.287318	10.0044	6.60903	9.89592	0.414368	0.378271
ENSRNOG00000061112		Mir676	0	0	0	0	0	0
ENSRNOG00000003218		Zfp286a	0	0	0	0	0	0.0555498
ENSRNOG00000021060		Fam187b	0.0477306	0.0566385	0.32531	0.0124366	0.0786706	0.0478782
ENSRNOG00000057375		RF00191	0	0	0	0	0	0
ENSRNOG00000053437		AC103090.1	56.6579	55.3858	69.7431	72.2033	60.9732	66.2045
ENSRNOG00000021794		Znhit2	22.8384	21.9568	22.6279	19.1961	19.8373	19.0692
ENSRNOG00000017949		Mvb12a	82.0362	86.6745	81.7683	73.1456	73.399	72.21
ENSRNOG00000046529		RGD1566134	0	0	0	0	0	0
ENSRNOG00000052180		RF00017	0	0	0	0	0	0
ENSRNOG00000055315		RF00026	0	0	0	0	0	0
ENSRNOG00000061751		Defa10	0	0	0	0	0	0
ENSRNOG00000058428		AABR07028568.2	0	0	0	0	0	0
ENSRNOG00000009715		Me1	71.0763	70.3001	74.0626	80.7964	87.2506	85.1903
ENSRNOG00000058293		LOC108349922	0	0	0	0	0	0
ENSRNOG00000039680		Gpr15	0	0	0	0	0	0
ENSRNOG00000014969		Lzts2	28.1244	25.9423	24.278	33.626	36.9485	36.7218
ENSRNOG00000036439		AABR07045454.2	0	0	0	0	0	0
ENSRNOG00000021067		Fxyd7	0.0291241	0.0259197	0	0.0682965	0.096006	0.0292142
ENSRNOG00000060339		RF00560	0	0	0	0	0	0
ENSRNOG00000047608		AABR07072065.1	0	0	0	0	0	0
ENSRNOG00000057589		Rnf11l1	46.2083	48.056	44.6628	42.6187	41.3499	46.2967
ENSRNOG00000052398		AABR07042802.1	0	0	0	0	0	0
ENSRNOG00000046554		Mir3075	0	0	0	0	0	0
ENSRNOG00000028768		Gbp4	0.00791875	0.00704746	0.00735963	0.0618986	0.0130518	0.0556027
ENSRNOG00000004858		LOC257643	0	0	0	0	0	0
ENSRNOG00000020148		Il4i1	4.85746	4.79164	4.34469	4.02374	4.47247	4.4844
ENSRNOG00000048000		AC120246.1	1.06639	0.949058	0.991097	1.04196	1.53794	0.267422
ENSRNOG00000052663		RF00026	0	0	0	0	0	0
ENSRNOG00000059958		RF00100	0	0	0	0	0	0
ENSRNOG00000059025		AABR07065298.1	0	0	0	0	0	0
ENSRNOG00000049223		Vipas39	17.5536	16.4272	15.3724	16.6015	16.1984	17.5071
ENSRNOG00000061750		AABR07035650.2	0	0	0	0	0	0
ENSRNOG00000013733		Ppp4r1	12.6202	13.2686	13.4245	13.1068	13.0856	12.7398
ENSRNOG00000055542		Vom1r93	0	0	0	0	0	0
ENSRNOG00000007242		Ehmt1	12.336	12.6689	12.3282	12.2243	12.2942	12.9966
ENSRNOG00000021644		Slc15a3	0.0369518	0.10688	0.128785	0.0577684	0.0380655	0.0926652
ENSRNOG00000007057		Csmd2	11.5682	10.5978	13.3328	10.9018	9.38734	11.4669
ENSRNOG00000058407		AABR07047823.1	0	0	0	0	0	0
ENSRNOG00000017285		Tab1	20.1787	22.0046	20.7348	22.9249	20.7502	22.3953
ENSRNOG00000030920		Rtn4r	6.26754	6.50759	6.45718	8.36465	10.7207	9.19889
ENSRNOG00000027124		Tdg	58.1223	58.2908	57.8285	58.3032	61.6245	60.4157
ENSRNOG00000017053		Fbxo36	0.834916	0.557289	0.994206	0.305921	0.387036	0.444921
ENSRNOG00000036451		AABR07051207.1	0	0	0	0	0	0
ENSRNOG00000056854		AABR07058498.2	0	0	0	0	0	0
ENSRNOG00000010047		Ddit4l	0.0232602	0	0	0	0	0.0233321
ENSRNOG00000000395		Kif1bp	44.0908	44.8411	40.3552	39.6998	39.4545	39.8076
ENSRNOG00000046922		Phactr4	14.9178	13.5184	16.3111	15.9116	14.4583	15.2924
ENSRNOG00000019249		Ap3b2	42.1919	41.4982	45.3101	42.7473	37.4811	41.8676
ENSRNOG00000024846		Ier5l	2.02648	2.55792	2.11729	3.75822	3.32918	2.80334
ENSRNOG00000017606		P2rx1	0.0422999	0.00752914	0.00786265	0.0132259	0.0209159	0.0169723
ENSRNOG00000053526		AABR07064918.1	0	0	0	0	0	0
ENSRNOG00000046663		Fcgr2a	0	0	0	0.0860681	0.025926	0
ENSRNOG00000061781		AABR07070872.1	0	0	0	0	0	0
ENSRNOG00000012972		Alox5	0	0.00798044	0.0166679	0.0350465	0	0.0179896
ENSRNOG00000004873		Prkch	0.354684	0.487017	0.725211	0.800055	0.701518	0.650571
ENSRNOG00000035587		Mir3575	0	0	0.336111	0.141344	0	0
ENSRNOG00000051866		AABR07058729.1	0	0	0	0	0	0
ENSRNOG00000004011		Nedd1	4.41637	4.47208	5.42601	4.36571	4.02573	4.57049
ENSRNOG00000012730		Lrrk1	0	0	0	0	0	0
ENSRNOG00000032984		AC107531.1	0	0	0	0	0	0
ENSRNOG00000015418		Klhl14	0.740885	0.760807	0.58926	0.902104	0.446186	0.428755
ENSRNOG00000048413		AABR07017809.1	0	0	0	0	0	0
ENSRNOG00000014018		St8sia1	5.23606	5.13106	5.98936	4.29078	3.92626	3.6708
ENSRNOG00000051802		AABR07010609.1	0	0	0	0	0	0
ENSRNOG00000011308		Uhrf2	29.195	30.3805	29.7703	29.4146	28.8988	32.0203
ENSRNOG00000057464		Fmr1	18.4985	17.6441	19.0446	17.5755	17.7187	18.6105
ENSRNOG00000053546		AABR07070069.1	0	0	0	0	0	0
ENSRNOG00000000630		AABR07044783.1	0	0	0	0	0	0
ENSRNOG00000006995		Ano6	10.8348	11.5738	12.8215	15.5552	13.5891	15.0182
ENSRNOG00000007367		2004-09-01	0.966256	1.34366	1.70252	1.11721	1.50966	1.13078
ENSRNOG00000061484		Adamts2	0	0	0.00383232	0	0	0
ENSRNOG00000009687		Ccdc120	5.60073	6.10819	5.77563	5.60198	4.41797	5.35625
ENSRNOG00000020929		Lin37	21.3364	23.4764	19.8299	22.4437	24.2289	22.5519
ENSRNOG00000054378		Aqp2	0	0	0	0	0.00455894	0
ENSRNOG00000000610		Cisd1	190.641	201.562	163.676	196.888	220.26	194.444
ENSRNOG00000039902		Lbh	33.2824	34.4674	33.5911	45.5816	33.5941	35.8134
ENSRNOG00000060877		RF00560	0	0	0	0	0	0
ENSRNOG00000014173		Smc3	45.1977	45.2313	52.1395	50.3858	46.1533	49.9906
ENSRNOG00000047452		LOC686209	0	0	0	0	0	0
ENSRNOG00000009935		Xpo1	68.2364	66.2285	70.3267	71.3072	70.0582	72.4849
ENSRNOG00000004301		Dcaf13	31.4212	31.9447	29.8739	29.9575	31.8129	27.8677
ENSRNOG00000025792		Crk	54.2187	49.863	53.6142	47.7908	50.5222	51.057
ENSRNOG00000025071		Qrich1	15.1639	14.3866	17.3759	15.9061	16.0123	15.2933
ENSRNOG00000019660		Spib	0.165162	0.104992	0.16081	0.276647	0.414816	0.362901
ENSRNOG00000019478		Irf9	7.79474	8.18785	7.6072	7.83231	7.94654	7.36198
ENSRNOG00000015036		Ctgf	0.00825839	0.00734974	0.0153506	0	0	0.0745554
ENSRNOG00000056754		AABR07054341.2	0.0889927	0.0264003	0.0275698	0.0231877	0.0244466	0.029756
ENSRNOG00000051940		RF00015	0	0	0	0	0	0
ENSRNOG00000053935		AC123500.1	0.21219	0.0629477	0.32868	0.221151	0.524604	0.283795
ENSRNOG00000011276		Tmem254	59.0419	56.4232	48.1089	49.1701	70.7924	61.1117
ENSRNOG00000049939		AABR07066677.1	16.7281	18.0131	17.8662	16.6158	19.422	16.5944
ENSRNOG00000045824		Spink14	0	0	0	0	0	0
ENSRNOG00000032219		Crygd	0	0	0	0	0	0
ENSRNOG00000031115		LOC499530	0	0	0	0	0	0
ENSRNOG00000029086		Olr1235	0	0	0	0	0	0
ENSRNOG00000016210		Micalcl	1.91618	2.12339	2.35603	3.81741	3.4225	3.28328
ENSRNOG00000050153		Senp18	0	0	0	0	0	0
ENSRNOG00000014264		AABR07027306.1	18.5119	18.6698	22.47	21.9072	19.8971	20.1904
ENSRNOG00000054826		AABR07049389.1	17.8863	17.2125	14.3259	20.6876	21.4513	13.7115
ENSRNOG00000007581		Slc17a8	0	0	0.00708965	0.0119256	0.00628653	0.00765185
ENSRNOG00000006636		Otud6b	41.0536	43.9426	43.2044	37.399	35.4566	32.4302
ENSRNOG00000016725		Elp1	18.2962	19.7561	21.565	19.6626	19.2774	19.9906
ENSRNOG00000054764		Flt3	0.0207531	0.0369394	0.0385756	0.0324443	0.0228038	0.0277564
ENSRNOG00000003029		Calr	753.357	708.869	716.403	619.565	621.465	617.503
ENSRNOG00000054293		LOC100909831	0	0	0	0	0	0
ENSRNOG00000018877		Zfp629	22.3916	20.2997	22.9274	21.527	19.9581	22.5758
ENSRNOG00000053950		AABR07005955.1	0	0	0	0	0	0
ENSRNOG00000021831		Kcnrg	0.824571	0.642114	0.814247	0.745253	0.722008	0.852968
ENSRNOG00000056866		RF00619	0	0	0	0	0	0
ENSRNOG00000052726		AC128759.2	0	0.0292364	0	0.56493	0.758038	0.626098
ENSRNOG00000058876		AABR07035008.3	0	0	0	0	0	0
ENSRNOG00000032699		Ttyh1	0.723351	0.908486	0.791653	0.507295	0.662975	0.718806
ENSRNOG00000051748		AABR07060628.1	0	0.119784	0	0	0.0277299	0
ENSRNOG00000006003		Ctnna2	7.93422	7.02243	8.63003	11.9268	12.263	12.3463
ENSRNOG00000057955		RF00004	0	0	0	0	0	0
ENSRNOG00000055674		RF00421	0	0	0	0	0	0
ENSRNOG00000031716		Ecm2	0	0	0	0	0	0
ENSRNOG00000060619		AABR07012582.2	0	0	0	0	0	0
ENSRNOG00000031824		Slc44a2	9.65313	10.4184	10.4847	10.4565	8.40082	9.43314
ENSRNOG00000017607		Faf2	55.6119	54.8989	54.4091	55.4443	51.4003	55.7572
ENSRNOG00000052339		LOC100912505	0	0	0	0	0	0
ENSRNOG00000052490		AABR07030568.2	0	0	0	0	0	0
ENSRNOG00000011243		MGC94891	0.0112769	0.0401445	0.0524035	0.0352594	0.260216	0.12443
ENSRNOG00000019031		Neu4	0	0	0	0	0	0
ENSRNOG00000053473		RF00026	0	0	0	0	0	0
ENSRNOG00000017044		Ccdc183	0.0470733	0.178049	0	0.0643928	0.0775872	0.0590236
ENSRNOG00000038477		AABR07070252.1	0	0	0	0	0	0.0588405
ENSRNOG00000059133		AABR07020537.1	0	0.00742791	0	0.00326201	0	0.0167441
ENSRNOG00000017982		Pnliprp2	0.0270764	0.337361	0.125823	0.211648	0.0892556	0.258021
ENSRNOG00000001443		Rhbdd2	49.1553	54.638	55.1723	52.7966	51.4112	52.2736
ENSRNOG00000011313		Sorcs1	2.1428	2.50356	2.21223	2.13702	1.75285	1.83178
ENSRNOG00000059732		RF00560	0	0	0	0	0	0
ENSRNOG00000000720		MGC95208	10.6089	11.8523	10.817	8.4912	9.70791	8.32093
ENSRNOG00000007446		Apip	11.1271	13.5399	11.1554	12.2547	11.9436	10.972
ENSRNOG00000057565		AABR07064468.1	0	0	0	0	0	0
ENSRNOG00000053037		AABR07024139.1	2.17538	0.269574	2.90472	2.67262	0.257188	2.1729
ENSRNOG00000052203		AABR07036066.1	0	0	0	0	0	0
ENSRNOG00000006967		Xiap	17.6583	17.7799	17.7482	18.8295	19.4388	20.7845
ENSRNOG00000042939		Nrip2	0.857226	1.10744	0.9509	0.518763	0.888758	0.859877
ENSRNOG00000057333		RF01848	0	0	0	0	0	0
ENSRNOG00000054955		AABR07005985.2	0.726694	0.776085	0.97671	0.410734	0.350112	0.358864
ENSRNOG00000061627		RF00560	0	0	0	0	0	0
ENSRNOG00000052567		AABR07029559.1	0	0	0	0	0	0
ENSRNOG00000061437		RF00026	0	0	0	0	0	0
ENSRNOG00000019482		Gnao1	43.6697	44.661	40.549	44.2464	41.1406	42.222
ENSRNOG00000048614		Teddm1	0	0	0	0	0	0
ENSRNOG00000055953		AABR07022202.2	0	0	0	0	0.0984889	0
ENSRNOG00000047307		Cntfr	165.006	151.184	168.603	196.391	208.737	208.914
ENSRNOG00000052391		Sh3bp5	3.86384	4.06261	3.44708	3.93143	3.64104	4.01479
ENSRNOG00000009192		Rnaseh2b	8.93291	9.39668	7.785	8.01282	10.7046	9.95941
ENSRNOG00000054417		AABR07002025.1	0	0	0	0	0	0
ENSRNOG00000003816		Tada1	10.3415	10.1317	12.4497	10.9561	12.1443	11.021
ENSRNOG00000009037		Sulf1	0.0454826	0.0202391	0.0634068	0.0355524	0.0262379	0.0364986
ENSRNOG00000060051		AABR07049038.1	4.32481	6.2216	5.23079	5.14034	5.90765	4.87303
ENSRNOG00000007766		Pqbp1	46.7771	45.1075	51.6043	51.5973	55.3824	49.7741
ENSRNOG00000027357		Sox17	0	0	0	0	0	0
ENSRNOG00000054972		Olr62	0	0	0	0	0	0
ENSRNOG00000020481		Pafah1b3	37.3907	41.9307	27.4619	34.4287	36.5917	36.1158
ENSRNOG00000052734		AABR07051310.1	0	0	0	0	0	0
ENSRNOG00000052568		RF00004	0.108872	0.193787	0.101185	0	0.358892	0
ENSRNOG00000058916		Ccdc65	0.0110083	0.0783764	0.020462	0.0172097	0.0362881	0.0110423
ENSRNOG00000027039		Mrpl22	59.8656	66.3265	59.3232	53.2659	58.5208	57.0745
ENSRNOG00000047072		LOC100910656	0	0	0	0	0	0
ENSRNOG00000055725		RF00026	0	0	0	0	0	0
ENSRNOG00000006526		Sema3c	1.3874	1.55163	1.74588	1.7499	1.80444	1.92538
ENSRNOG00000051726		AABR07042418.1	0	0	0	0	0	0
ENSRNOG00000049495		Krt71	0.0397413	0	0	0	0	0
ENSRNOG00000028430		LOC257650	2.64007	2.659	4.05915	2.76854	3.11583	3.30212
ENSRNOG00000054655		RF00100	0	0	0	0	0	0
ENSRNOG00000055823		AABR07033666.1	0	0	0	0	0	0
ENSRNOG00000061848		RF00015	0	0	0	0	0	0
ENSRNOG00000022748		Tmem126a	10.6946	13.3936	10.8657	10.7033	11.3189	11.5006
ENSRNOG00000048242		Txlna	40.5886	41.3431	40.2482	37.355	39.3496	41.775
ENSRNOG00000017963		AABR07001099.1	4.98707	4.90188	4.46552	4.80411	4.37816	4.59759
ENSRNOG00000014923		Ifitm5	0.564793	1.27947	1.19299	0.882965	1.05784	0.824057
ENSRNOG00000044314		Mir3084c	0	0	0	0	0	0
ENSRNOG00000053969		AABR07008681.1	0	0	0	0	0	0
ENSRNOG00000061559		LOC100359711	0	0	0	0	0	0
ENSRNOG00000055055		Olr1486	0	0	0	0	0	0
ENSRNOG00000056852		RF00105	0	0	0	0	0	0
ENSRNOG00000005971		Gpr176	2.04466	2.16814	2.09235	3.05198	3.58964	3.43649
ENSRNOG00000032516		AABR07049223.1	19.7549	15.8078	12.7232	12.3264	13.1384	13.5583
ENSRNOG00000045686		Nfs1	10.5009	0.230411	0.250242	0.331891	16.2495	0.218146
ENSRNOG00000009593		Dtwd1	5.53901	5.85608	4.55249	4.30882	4.91673	4.40474
ENSRNOG00000016384		Pik3cb	2.22108	2.29465	2.02425	2.46965	2.47603	2.47838
ENSRNOG00000059607		RF00066	0	0	0	0	0	0
ENSRNOG00000050734		AABR07052585.3	0	0	0	0	0	0
ENSRNOG00000061205		RF00492	3.53951	4.06883	3.7008	0.691684	1.33693	2.0711
ENSRNOG00000058592		AABR07006649.1	0	0	0	0	0	0
ENSRNOG00000054742		AABR07066188.1	0	0	0	0	0	0
ENSRNOG00000061391		AABR07070122.1	0	0	0	0	0	0
ENSRNOG00000037837		Olr560	0	0	0	0	0	0
ENSRNOG00000052534		AABR07044367.1	0	0.140202	0.292824	0.369422	0.129826	0.158022
ENSRNOG00000003779		Dedd	15.6927	14.7365	15.5946	13.4759	14.1772	13.4872
ENSRNOG00000054789		RF00554	0	0	0	0	0	0
ENSRNOG00000051135		Tug1	21.1862	22.0918	21.7746	21.2307	19.8164	21.3588
ENSRNOG00000061890		Ust5r	0	0	0	0	0	0
ENSRNOG00000048801		Olr1517	0	0	0	0	0	0
ENSRNOG00000034781		RF00001	0	0.711794	0	0.468882	0	0
ENSRNOG00000059790		Krt78	0	0	0	0	0	0.065126
ENSRNOG00000060762		AABR07053968.1	0	0	0	0	0	0
ENSRNOG00000055137		AABR07006904.1	0	0	0	0	0	0.164893
ENSRNOG00000013393		Eif2a	32.4348	32.8979	29.1421	28.9459	31.2363	28.2635
ENSRNOG00000035578		Mir19a	0	0	0	0	0	0
ENSRNOG00000002642		Ptges3	174.931	165.132	189.792	183.738	187.764	186.435
ENSRNOG00000059766		Mir201	0	0	0	0	0	0
ENSRNOG00000028436		Rprml	74.1365	73.3084	72.7865	128.775	145.145	137.607
ENSRNOG00000020431		Matk	23.4865	21.2997	24.8635	24.0029	28.2394	25.4018
ENSRNOG00000052572		LOC103690302	1.64081	1.54657	1.77635	1.47406	1.26809	1.30288
ENSRNOG00000026319		Akap9	13.1273	12.7986	16.9881	13.7621	11.4843	12.02
ENSRNOG00000018048		Dctn5	32.3836	31.0427	31.3629	31.829	30.4601	29.6756
ENSRNOG00000055926		RF00156	0	0	0	0	0	0
ENSRNOG00000019701		RGD1597339	33.0971	30.9785	28.5695	24.1547	33.3162	27.1425
ENSRNOG00000045931		Sik3	18.6579	19.6427	19.3361	20.2728	19.6469	21.6766
ENSRNOG00000033942		Grin2a	0.0732377	0.0738701	0.04084	0.0267157	0.0241424	0.0342833
ENSRNOG00000060184		AABR07065808.1	0	0	0	0	0	0
ENSRNOG00000001275		Tmem184a	344.901	323.169	328.081	372.877	429.429	410.034
ENSRNOG00000050258		Ccnd3	42.9712	41.255	34.2434	34.0062	33.5209	34.6339
ENSRNOG00000050128		AABR07035725.1	0	0.0130974	0.0136776	0.0345108	0.0606407	0
ENSRNOG00000014806		Pnkd	16.2438	16.1775	16.4388	15.2972	17.7533	16.294
ENSRNOG00000046308		LOC100910308	1.17126	2.25566	3.1943	1.27575	2.95903	1.63713
ENSRNOG00000008566		Mrpl15	40.202	40.4939	39.0368	32.0708	37.0351	32.8058
ENSRNOG00000026111		Morn5	0.60111	0.434663	0.2095	0.38177	0.464419	0.20727
ENSRNOG00000026157		Pnpla4	5.76393	6.66371	5.89093	5.76588	6.58296	5.87471
ENSRNOG00000054291		RF00026	0	0	0	0	0	0
ENSRNOG00000061796		AABR07016947.2	0	0	0	0	0	0
ENSRNOG00000037983		Car15	0	0.114238	0.0397662	0	0	0
ENSRNOG00000058708		RF00416	0	0	0	0	0	0
ENSRNOG00000009079		Prkar2b	27.0859	29.8788	28.9148	34.3162	38.3688	36.8839
ENSRNOG00000056334		RF00026	0	0	0	0	0	0
ENSRNOG00000056488		RF00003	0	0.138109	0.144227	0.242606	0.127889	0.155664
ENSRNOG00000053087		AABR07013676.1	0	0	0	0	0	0
ENSRNOG00000059153		Olr707	0	0	0	0	0	0
ENSRNOG00000057455		RF00554	0	0	0	0	0	0
ENSRNOG00000052072		RF00560	0	0	0	0	0	0
ENSRNOG00000000887		AABR07035098.1	3.66301	3.73643	3.95432	4.53719	4.96929	3.75913
ENSRNOG00000025141		Kiz	12.8817	12.6918	13.2458	13.2207	13.29	13.8616
ENSRNOG00000045695		Rlim	0.0942213	0	4.41346	0	0.0155297	0.0567076
ENSRNOG00000023202		Usp15	27.6353	26.9264	28.9841	27.4678	27.1712	28.0478
ENSRNOG00000008837		Ass1	14.5075	14.1143	9.8458	25.3832	28.5359	27.1182
ENSRNOG00000039730		Orai3	11.9272	12.6969	11.2645	13.1894	13.4648	14.1245
ENSRNOG00000057476		AABR07054045.1	2.93615	3.24156	2.10708	2.35321	2.49629	2.7029
ENSRNOG00000048115		AABR07017773.1	0	0	0	0	0	0
ENSRNOG00000018978		Scart1	0	0.00562341	0	0	0	0
ENSRNOG00000039587		Wdr13	36.2084	38.6693	35.0786	35.091	38.5169	39.478
ENSRNOG00000007740		Tacstd2	0	0	0	0	0	0
ENSRNOG00000058495		AABR07027283.1	0	0	0	0	0	0
ENSRNOG00000052022		Pnma3	0	0	0	0	0	0
ENSRNOG00000009446		Rxra	22.6698	21.7884	22.4517	23.4197	23.3789	24.127
ENSRNOG00000047874		Nelfcd	48.4852	47.5628	46.7635	43.392	40.0747	44.3894
ENSRNOG00000031795		AABR07068650.1	0.140599	0.0750776	0.0784032	0.120893	0.139043	0.267965
ENSRNOG00000058419		AABR07070198.1	0	0	0	0	0	0
ENSRNOG00000060957		RF00560	0	0	0	0	0	0
ENSRNOG00000058225		RF00026	0	0	0	0	0	0
ENSRNOG00000060335		Strn3	14.2636	14.3731	16.2538	15.3348	14.9667	16.1626
ENSRNOG00000048630		Klk1c6	0	0	0	0	0	0
ENSRNOG00000029637		Acot6	0.0819332	0.0145836	0.106607	0.0640448	0.21607	0.131498
ENSRNOG00000009917		LOC500227	1.5596	2.33261	1.42935	1.28682	1.33883	1.09727
ENSRNOG00000010673		Eral1	17.8386	17.9696	18.3853	15.3751	15.2067	17.2884
ENSRNOG00000020614		Phlda2	0.203869	0.322556	0.252633	0.247891	0.410692	0.386277
ENSRNOG00000060627		RF00153	0	0.217725	1.13685	1.14738	0.403225	2.20859
ENSRNOG00000023577		AABR07068272.1	15.768	16.2316	17.8878	16.4562	15.404	16.3813
ENSRNOG00000048113		Cbx8	21.8972	23.3309	18.7144	19.9532	19.724	19.369
ENSRNOG00000043180		AABR07071966.1	0	0	0	0	0	0
ENSRNOG00000061874		AABR07047036.1	0	0	0	0	0	0
ENSRNOG00000007178		Cd8a	0	0	0	0.0117108	0	0
ENSRNOG00000045293		RF00001	0	0	0	0	0	0
ENSRNOG00000014550		Plcxd3	51.5999	45.2046	50.4725	51.8125	61.1635	57.1016
ENSRNOG00000002014		Stap1	0	0	0.014553	0	0	0
ENSRNOG00000060590		AABR07046248.1	0	0	0	0	0	0
ENSRNOG00000061709		RF00026	0	0	0	0	0	0
ENSRNOG00000005726		Pclo	7.09695	6.49191	8.95579	7.15283	5.70226	6.1864
ENSRNOG00000047970		Lyrm4	33.9691	35.643	28.0387	32.5549	36.2175	34.0546
ENSRNOG00000050323		Srsf1	77.2419	74.8853	75.5956	73.7209	75.8297	77.3823
ENSRNOG00000034040		LOC108348079	0	0	0	0	0	0
ENSRNOG00000013195		Ruvbl1	25.6444	25.0937	25.4977	24.8061	27.0011	23.8711
ENSRNOG00000022490		LOC100361008	22.124	26.9572	18.7087	43.9393	46.99	30.2883
ENSRNOG00000025473		Tppp2	0	0	0	0	0	0
ENSRNOG00000033588		Siglec15	0.0405354	0	0	0	0	0
ENSRNOG00000009824		Irf2	17.2368	17.3151	17.6818	17.389	19.5522	20.2391
ENSRNOG00000017155		Nck2	21.7723	22.0456	17.5243	19.9795	20.035	21.1062
ENSRNOG00000006350		Tle6	2.33016	2.01823	2.42668	2.50446	2.41754	2.72345
ENSRNOG00000019875		Matr3	50.0604	52.1851	59.7438	57.4373	55.5314	57.9337
ENSRNOG00000008312		Stra6	0.0440938	0.0313938	0	0.0827205	0.0799439	0.0619222
ENSRNOG00000005403		Olr811	0	0	0	0	0	0
ENSRNOG00000001399		Tbx5	0	0	0	0	0	0
ENSRNOG00000055778		AC118105.1	0	0	0	0	0	0
ENSRNOG00000059943		RF00026	0	0	0	0	0	0
ENSRNOG00000059441		LOC100912266	0	0	0	0	0	0
ENSRNOG00000061352		AC117905.2	0	0.0714542	0	0	0	0
ENSRNOG00000050163		LOC498300	0	0	0	0.0186192	0.117781	0.0238934
ENSRNOG00000029574		Rps4x-ps9	176.712	174.823	146.936	173.198	175.091	178.395
ENSRNOG00000028158		Tex22	0.0426995	0.0950033	0.0198423	0.116819	0.0703781	0.14991
ENSRNOG00000009351		Srp68	54.5031	37.9647	40.1739	35.8	35.4047	36.2896
ENSRNOG00000005434		Sptbn1	83.4769	82.1774	104.043	88.6879	79.6178	82.1594
ENSRNOG00000038183		Heatr4	0.309039	0.237743	0.165516	0.171963	0.220149	0.199657
ENSRNOG00000036334		AABR07033229.1	0	0	0	0.203182	0	0
ENSRNOG00000037897		Rps19	139.249	325.078	310.286	288.018	275.591	304.849
ENSRNOG00000051491		RF00100	0	0	0	0	0	0
ENSRNOG00000002776		Sell	0	0	0	0	0	0
ENSRNOG00000002823		Mapk9	23.7812	25.5698	25.7901	22.3548	22.9833	23.0866
ENSRNOG00000012315		Agmat	0.0279874	0.0996319	0.0390169	0.0984463	0.172985	0.168444
ENSRNOG00000050438		Olr1724	0	0	0	0	0	0
ENSRNOG00000018281		Uqcrfs1	256.953	255.716	253.22	246.935	280.306	242.483
ENSRNOG00000047480		AC111315.1	0	0	0.322107	0	0	0
ENSRNOG00000009950		Msantd2	7.5685	6.83578	7.4868	7.23402	7.4518	7.19101
ENSRNOG00000035461		Mirlet7c2	0	0.194807	0	0	0.541171	0.219568
ENSRNOG00000008619		Agtrap	5.12506	6.01559	5.06473	5.07691	4.59993	4.04402
ENSRNOG00000048059		Ct45a9	0	0	0.041832	0.0351831	0.0741865	0.0451492
ENSRNOG00000007720		Rnf26	13.2201	12.2283	12.9546	13.6601	11.8144	12.5021
ENSRNOG00000030674		AABR07033162.1	3.2742	3.50293	4.2408	2.94053	2.98535	3.28432
ENSRNOG00000004387		Utp23	10.3881	10.1647	9.24306	10.0383	10.9179	10.9199
ENSRNOG00000026059		Paqr6	5.15195	4.68011	3.2252	4.73657	4.97173	6.02473
ENSRNOG00000060112		Vom1r97	0	0	0	0	0	0
ENSRNOG00000008338		Bsdc1	31.417	33.2981	29.8405	32.2423	30.0858	31.8877
ENSRNOG00000045952		Ephb4	0	0	0.00477785	0.00803687	0.0127098	0.00515672
ENSRNOG00000057780		AABR07032496.1	0	0	0	0	0	0
ENSRNOG00000011094		Efcab6	1.53986	1.5296	1.50816	1.09796	1.18992	1.16831
ENSRNOG00000058152		RF00401	0.159959	0	0	0	0.263647	0
ENSRNOG00000037191		Umodl	0	0.00977635	0	0	0.00905287	0.011019
ENSRNOG00000062269		AABR07058263.1	0	0	0	0	0	0
ENSRNOG00000049030		AABR07017789.1	0	0	0	0	0	0
ENSRNOG00000059671		AABR07068044.1	0	0	0	0	0	0
ENSRNOG00000012280		Ptx3	0	0	0	0	0	0
ENSRNOG00000038539		Lrrc15	0	0	0.0445052	0.0187157	0.0394636	0
ENSRNOG00000003891		AC118957.1	0.500215	0.349782	0.365276	1.70366	2.67951	1.72033
ENSRNOG00000057509		AABR07019663.1	1.55048	1.09579	0	0.499044	0.450976	0.869123
ENSRNOG00000001877		Med15	27.0786	27.9568	25.9414	28.9355	28.3821	29.883
ENSRNOG00000017302		Slc6a3	0	0.00690804	0.00721403	0.0060674	0	0
ENSRNOG00000049499		AABR07051535.1	0	0	0	0	0	0
ENSRNOG00000025796		RGD1306072	1.22958	1.34894	1.81118	1.61397	1.19813	1.17133
ENSRNOG00000056233		AC120262.2	53.8313	60.7435	69.0451	68.4265	58.0449	62.5768
ENSRNOG00000001727		Lsg1	16.1662	16.6204	16.8179	16.7375	17.748	16.0255
ENSRNOG00000010428		Bahd1	30.7361	31.603	31.3753	30.8289	27.2003	28.9301
ENSRNOG00000056207		Capza2	97.472	98.2467	88.0136	86.1994	93.7963	87.6927
ENSRNOG00000049429		LOC100910858	0	0	0	0	0	0
ENSRNOG00000016620		Csnk1g1	0.998418	1.09538	1.43188	1.18411	1.31223	0.992872
ENSRNOG00000006587		Setd3	41.2526	44.2671	40.5628	38.6262	43.2493	44.711
ENSRNOG00000056169		RF00003	0	0	0	0	0	0
ENSRNOG00000055955		RF00045	0	0	0	0	0	0
ENSRNOG00000060310		LOC688815	4.16935	2.87572	3.51169	4.0942	3.97288	3.16282
ENSRNOG00000046071		Mir3566	1.33544	1.69786	0.531919	0.298249	0.628883	0.765466
ENSRNOG00000062025		AABR07014317.2	0	0	0	0	0	0
ENSRNOG00000059061		Uqcr10	132.629	146.834	141.083	141.891	154.735	115.182
ENSRNOG00000004595		Pou6f1	3.75627	3.48399	4.48726	4.03632	3.43356	3.53415
ENSRNOG00000016687		Ssc5d	13.4992	12.615	15.3579	21.046	17.3963	19.8937
ENSRNOG00000040424		Mir761	0	0	0	0	0	0
ENSRNOG00000049077		Mir5125	67.3852	76.1349	85.134	73.8657	45.5542	80.7954
ENSRNOG00000046005		Scd2	509.65	487.514	486.722	432.914	774.357	612.544
ENSRNOG00000020833		Cspg5	9.93683	9.23175	11.499	11.6889	14.94	14.8541
ENSRNOG00000041256		AABR07041066.1	0	0	0	0	0	0
ENSRNOG00000006380		Srsf6	56.3225	57.8642	57.9902	50.2305	56.3919	53.2547
ENSRNOG00000050044		Ptp4a2	146.198	148.386	138.445	154.499	148.86	146.537
ENSRNOG00000051165		AABR07039176.1	0	0	0	0	0	0
ENSRNOG00000039596		Prob1	0.768647	0.653535	0.784537	0.94416	0.599515	0.874286
ENSRNOG00000035465		Mir3065	0.20189	0	0	0	0	0
ENSRNOG00000057779		Olr1149	0	0.0190397	0	0.0334456	0	0
ENSRNOG00000008676		Emp1	0.136643	0.066332	0.150086	0.13594	0.0204744	0.0498422
ENSRNOG00000050966		AABR07024757.1	0.00405354	0	0	0	0	0
ENSRNOG00000014092		Paip2b	20.6344	22.7555	23.5252	18.3584	18.1405	17.6128
ENSRNOG00000046267		AABR07003224.1	0	0	0	0	0	0
ENSRNOG00000056672		AABR07027390.2	0	0	0	0	0	0
ENSRNOG00000053794		AABR07072634.2	0	0	0	0	0	0
ENSRNOG00000040715		RF00001	2.36687	1.20368	1.8855	1.18936	1.53258	1.18709
ENSRNOG00000016887		Hrh4	0	0	0	0	0	0
ENSRNOG00000007219		LOC103692716	3.5791	2.4541	2.41361	2.8272	2.934	2.83234
ENSRNOG00000011785		Xrn2	40.3053	40.1313	41.0792	46.073	43.1324	43.4106
ENSRNOG00000015426		Purg	4.83729	5.23484	5.1475	4.03847	3.78596	5.19679
ENSRNOG00000049944		Slc25a22	3.69712	8.61188	9.21663	1.48148	4.39976	4.25747
ENSRNOG00000018463		Tctex1d4	0.031507	0	0	0.0246281	0	0
ENSRNOG00000018069		Ngdn	18.1823	18.6606	16.2393	18.2965	16.8947	17.1279
ENSRNOG00000040183		Olr1684	0	0	0	0	0	0
ENSRNOG00000058750		LOC103693015	0.927792	0.682107	1.91202	0.914419	2.16083	1.01159
ENSRNOG00000013330		Cdhr1	12.0252	13.1318	12.7953	13.3065	13.4795	13.8588
ENSRNOG00000020881		Frmd8	68.7224	70.0255	68.8457	70.5069	68.797	66.5765
ENSRNOG00000031210		Vmn1r83	0	0	0	0	0	0
ENSRNOG00000046345		Rpn1	589.369	556.601	507.342	497.264	527.261	499.824
ENSRNOG00000029096		Gykl1	0	0	0	0	0	0
ENSRNOG00000009058		Spata21	0.0163031	0.021764	0.030304	0.00637185	0.00671779	0
ENSRNOG00000050450		Kcnip2	0.0180352	0.38522	0	0.437027	0	0
ENSRNOG00000052674		RF00004	0	0	0	0	0	0
ENSRNOG00000050113		AABR07030019.1	14.4658	12.8742	11.3438	16.3724	10.5554	11.4875
ENSRNOG00000011189		Acy1	5.56811	4.75583	4.51276	5.7448	5.02369	5.45297
ENSRNOG00000051190		AABR07015507.1	68.8979	60.8712	56.0776	55.5202	54.6115	52.0217
ENSRNOG00000047148		LOC684179	0	0	0	0	0	0
ENSRNOG00000056891		RF00026	0	0	0	0	0	0
ENSRNOG00000040153		LOC108348062	24.4357	9.26532	5.81547	24.0129	5.73459	6.7636
ENSRNOG00000030443		Rab9a	23.2141	26.6106	23.0185	21.9539	22.6339	21.6297
ENSRNOG00000054586		RF00100	0.249038	0.110818	0	0.0486664	0.102617	0.124904
ENSRNOG00000038459		Ulk3	4.61836	4.22795	3.85634	3.54423	3.33028	3.45035
ENSRNOG00000002126		Ncam2	6.36396	6.83979	7.68657	8.02194	9.31351	8.91599
ENSRNOG00000053385		RF00560	0	0	0	0	0	0
ENSRNOG00000004441		Fcmr	0	0	0	0	0.0207471	0
ENSRNOG00000046799		Phb	84.4341	83.7321	74.2938	70.7574	84.9364	78.8897
ENSRNOG00000055334		AABR07044088.1	0	0	0	0	0	0
ENSRNOG00000010630		Prcp	6.29474	6.35431	6.63578	6.04213	5.47051	6.19057
ENSRNOG00000060816		RF00554	2.32667	1.68242	2.70299	1.70503	1.7976	2.04213
ENSRNOG00000012923		Rprd1b	21.7666	20.5629	19.6401	21.7228	18.7774	19.668
ENSRNOG00000021817		Irak2	0.981812	1.2321	0.859972	1.20363	0.710164	0.510137
ENSRNOG00000018057		Mrpl2	27.5819	23.4091	19.363	24.1128	23.3304	25.0031
ENSRNOG00000025484		Tmem177	9.32521	10.105	9.05465	9.31404	8.77608	8.06931
ENSRNOG00000008534		Dusp15	4.14594	3.46819	3.46084	3.62153	2.74764	3.3118
ENSRNOG00000016684		Wnk2	20.7814	19.158	23.1123	25.0562	24.1622	25.2938
ENSRNOG00000003993		Thap2	10.3655	10.1588	9.39724	9.17116	9.0664	8.80286
ENSRNOG00000014034		Olfml2a	0.0176615	0.0188619	0.0525263	0.0524608	0.011644	0.0496051
ENSRNOG00000025625		Rnase4	0.133157	0	0.123755	0.0867373	0.0548679	0.133568
ENSRNOG00000057392		AABR07042859.1	0	0.149649	0.0173642	0.0292086	0.0461916	0
ENSRNOG00000051303		AC127084.5	0.059451	0.164608	0.0982282	0.113596	0.119764	0.218661
ENSRNOG00000031307		AABR07017241.1	0	0	0	0	0	0
ENSRNOG00000053615		Mrpl50	20.6436	20.3056	20.73	17.199	21.3687	20.1598
ENSRNOG00000021988		Olfr225	0	0	0	0	0	0
ENSRNOG00000054270		AABR07017604.1	0.66449	0.347869	0.690228	0.336091	0.547613	1.21546
ENSRNOG00000016023		Kank1	6.72628	6.34453	6.71361	6.92393	6.63622	6.9312
ENSRNOG00000031005		AABR07002523.1	0	0	0	0	0	0
ENSRNOG00000045670		Tnfsf12	0.175767	0.0842305	0.100527	0.179667	0.0111424	0.0813743
ENSRNOG00000010213		Fgd5	0.534068	0.687225	0.711343	0.470646	0.403687	0.440177
ENSRNOG00000014970		Kif17	0.935224	0.782182	0.895371	0.845537	1.31859	1.2998
ENSRNOG00000030326		Olr344	0	0	0	0	0	0
ENSRNOG00000058088		LOC102550206	0	0	0	0	0	0
ENSRNOG00000046940		AABR07061874.1	0	0	0	0	0	0
ENSRNOG00000010598		Hs3st1	3.03477	3.31039	2.30468	4.88283	6.60765	5.66188
ENSRNOG00000029903		Spock3	6.7498	6.35852	6.77997	4.44821	4.77751	4.18059
ENSRNOG00000036980		Zgrf1	3.39658	3.5528	3.3906	3.78913	3.22767	3.30614
ENSRNOG00000012019		B3galnt1	36.1153	36.6996	32.9511	33.6973	36.38	33.7963
ENSRNOG00000002793		Sstr2	8.7939	6.94885	7.33996	5.4649	5.36765	5.38456
ENSRNOG00000052057		AABR07006727.1	1.68037	0.436183	0.130144	0.0547292	0.173102	0
ENSRNOG00000020304		Pdcd11	19.1496	19.7771	23.1387	19.8106	18.0434	19.8664
ENSRNOG00000036838		Krtap31-1	0	0	0	0	0	0
ENSRNOG00000003596		Itgb1bp2	0.0488902	0.0725182	0.34836	0.127387	0.147733	0.0980828
ENSRNOG00000021155		Ctsk	0.0146855	0.117627	0.0409458	0.0688753	0.0847172	0.0589236
ENSRNOG00000040273		RGD1562402	60.2295	63.8145	72.561	64.2129	67.1202	59.4762
ENSRNOG00000047717		Mir3562	0	0.165238	0	0	0	0.186241
ENSRNOG00000047703		Vom2r33	0	0	0	0	0.0153558	0
ENSRNOG00000001470		Limk1	30.0423	28.6305	31.8289	32.4744	38.0638	36.3088
ENSRNOG00000000858		Sapcd1	1.98978	3.39205	3.28184	3.11071	3.48746	3.42964
ENSRNOG00000056656		AABR07044049.1	0.77396	0.791971	0.712976	1.05805	0.724933	1.15256
ENSRNOG00000055240		AABR07032237.1	0	0	0	0	0.252016	0
ENSRNOG00000015637		LOC690507	0	0.0333453	0	0.00976251	0	0
ENSRNOG00000048318		AABR07037161.1	0	0	0	0	0	0
ENSRNOG00000019254		Dyrk1b	16.7215	17.8652	16.4064	16.3938	18.078	17.9673
ENSRNOG00000021824		Dnajb1	26.098	25.15	22.751	25.7439	28.7423	25.9304
ENSRNOG00000044303		RF00001	0	0	0	0.602021	0.158677	0
ENSRNOG00000052696		AABR07071851.1	0	0	0	0	0	0
ENSRNOG00000058548		AABR07048379.1	0	0	0	0	0	0
ENSRNOG00000055881		RF00560	0	0	0	0	0	0
ENSRNOG00000033429		LOC100363112	0	0.118632	0.0309718	0	0	0.0668556
ENSRNOG00000061422		AABR07019442.3	0	0	0	0	0	0
ENSRNOG00000047596		AC118414.2	0.705991	0.0571192	0.536844	0.0501684	0.211569	0.579415
ENSRNOG00000048471		AABR07054355.1	0.0323904	0.0288265	0	0.0253187	0	0.0649811
ENSRNOG00000025076		Ecpas	37.6114	35.396	39.4906	36.8881	36.6768	37.7241
ENSRNOG00000036530		AABR07071748.1	0	0	0	0	0	0
ENSRNOG00000018951		Col4a5	0.285649	0.297066	0.19389	0.396392	0.195731	0.273655
ENSRNOG00000003228		Mid1ip1	192.606	185.994	188.134	183.861	252.317	232.806
ENSRNOG00000011533		Irx3	0	0	0	0	0	0
ENSRNOG00000039152		Frem3	0.0252247	0.0196431	0.00293046	0.0246468	0.0363789	0.00948853
ENSRNOG00000031181		Olr1060	0	0	0	0	0	0
ENSRNOG00000020543		Nosip	17.0152	18.7337	17.9629	18.5482	18.609	17.6917
ENSRNOG00000048017		AABR07056026.1	0	0	0	0	0	0
ENSRNOG00000015283		Nt5c1a	0	0	0	0	0	0
ENSRNOG00000051234		AABR07030147.1	0	0	0	0	0	0
ENSRNOG00000011306		Myod1	0.0106749	0.00950033	0.00992115	0.00834424	0.00879727	0
ENSRNOG00000049767		AABR07010421.1	0	0	0	0	0	0
ENSRNOG00000021586		Gpr39	8.5775	10.3777	10.2988	11.3075	11.9214	8.99934
ENSRNOG00000025898		LOC690142	0	0	0	0	0	0
ENSRNOG00000000993		Pcp2	0	0	0	0	0	0
ENSRNOG00000012422		Tnik	17.8676	17.9881	20.9767	19.4209	17.1523	18.5119
ENSRNOG00000014832		Mapkapk3	1.03146	1.17725	1.00986	1.87103	1.3367	1.61912
ENSRNOG00000047235		Vps26b	41.6591	41.7072	41.2794	42.4955	40.6862	44.1678
ENSRNOG00000056436		AABR07072028.1	0.0653919	0	0	0	0	0
ENSRNOG00000058563		Spdye4	0	0	0	0	0	0
ENSRNOG00000057238		AABR07031165.1	0	0	0	0	0	0
ENSRNOG00000041964		AABR07007743.1	0	0	0	0	0	0
ENSRNOG00000027867		Rexo4	83.9222	83.3468	88.0589	89.3483	86.3055	86.2596
ENSRNOG00000020619		Eif3g	152.876	152.855	161.146	147.967	156.775	148.031
ENSRNOG00000056542		AABR07071402.1	0	0	0	0	0	0
ENSRNOG00000003207		Fmnl1	2.95067	2.85024	2.85161	4.09209	3.30375	3.34732
ENSRNOG00000013944		Zc3hav1l	2.48707	2.68479	2.01183	2.21408	2.08757	2.49476
ENSRNOG00000052473		RF00026	0	0	0	0.151912	0	0
ENSRNOG00000000799		Abcf1	131.538	126.636	142.174	129.78	127.41	128.893
ENSRNOG00000009322		Ccdc126	9.62949	11.4722	9.53727	7.51298	8.56109	8.94343
ENSRNOG00000037757		Calhm6	0.0170308	0	0	0	0	0
ENSRNOG00000053821		RF00026	0	0	0	0	0	0
ENSRNOG00000056076		Mif	0	0	0.111071	0	0	0
ENSRNOG00000048609		LOC103690355	0	0	0	0	0	0
ENSRNOG00000003150		Mpc2	99.5327	97.2562	87.8747	83.855	105.768	92.0727
ENSRNOG00000046174		AABR07073146.1	0.051728	0	0	0	0	0
ENSRNOG00000004425		Klhdc1	0.320071	0.186936	0.288176	0.242372	0.346204	0.240796
ENSRNOG00000057060		LOC108348049	0.0191656	0.0042642	0.00890617	0.0112359	0.0197432	0.00961242
ENSRNOG00000002393		Eprs	35.7429	35.5826	36.9459	37.6547	33.423	36.2813
ENSRNOG00000019937		Kcnk1	17.1166	16.811	14.9233	14.2238	13.5854	13.3779
ENSRNOG00000010784		Scg3	125.398	125.455	140.81	140.037	128.688	134.085
ENSRNOG00000036742		Uqcrc2	90.8511	94.2276	88.9396	87.1456	92.1681	84.728
ENSRNOG00000013172		Nr1h3	0.0127184	0.011319	0.0118204	0.0795331	0	0.127578
ENSRNOG00000055604		LOC100911229	0	0	0	0	0	0
ENSRNOG00000002171		Phldb2	26.9026	26.6864	27.8685	28.9255	26.8859	28.4919
ENSRNOG00000027035		Sgo2	4.21709	4.00114	3.77293	4.18679	4.30424	4.55834
ENSRNOG00000014798		RGD1309540	31.7218	30.9544	30.8238	31.5877	27.0809	29.6277
ENSRNOG00000000376		Tmem167b	0.831786	0.904769	0.773056	0.505698	1.14247	0.278119
ENSRNOG00000038512		Uts2b	0	0	0	0	0	0
ENSRNOG00000021752		Foxq1	1.51814	1.82796	1.54137	1.30635	1.76628	1.74038
ENSRNOG00000044629		RF00001	0	0	0	0	0	0
ENSRNOG00000011563		Olr1199	0	0	0	0	0	0
ENSRNOG00000055854		AABR07051403.1	0	0	0	0	0	0
ENSRNOG00000048686		AABR07066379.1	9.1527	8.82729	9.6632	6.22643	10.2412	8.37431
ENSRNOG00000001153		Pla2g1b	6.48002	6.90741	4.86562	10.2736	9.77537	7.67521
ENSRNOG00000050360		Urad	1.47654	1.75211	2.4015	2.21216	0.980227	2.87993
ENSRNOG00000012470		Zc3h12c	2.74952	2.80125	3.20622	3.17486	3.3047	3.62314
ENSRNOG00000054249		AABR07051939.1	0	0	0	0	0	0
ENSRNOG00000014445		Hp1bp3	100.235	102.159	103.557	102.697	96.5647	102.006
ENSRNOG00000055416		RF00026	0	0	0	0	0	0
ENSRNOG00000031273		AABR07034639.1	14.8739	15.9791	38.787	22.3877	19.6759	17.4307
ENSRNOG00000061297		RF00017	0	0	0	0	0	0
ENSRNOG00000049832		Olr281	0	0	0	0	0	0
ENSRNOG00000010194		Ift43	11.7437	13.5138	10.8914	10.8169	11.5686	11.4299
ENSRNOG00000052835		RF00100	0	0	0	0	0	0
ENSRNOG00000018102		Coa5	34.2851	36.4775	36.4199	37.954	33.4459	35.2807
ENSRNOG00000052683		RF00026	0	0	0	0	0	0
ENSRNOG00000061593		RF00272	0	0	0	0	0	0
ENSRNOG00000053865		AABR07006854.1	0	0	0	0	0	0
ENSRNOG00000050792		Tnfaip6	0.0915391	0.108623	0.141793	0	0	0.0306074
ENSRNOG00000062190		LOC100911744	0	0.028648	0.0897511	0	0.053056	0.0322894
ENSRNOG00000009620		Cybrd1	0.0266257	0	0	0	0	0
ENSRNOG00000013215		Dctd	16.6103	16.3314	12.7389	17.0799	15.6949	16.0733
ENSRNOG00000051673		RF00560	0	0	0	0	0	0
ENSRNOG00000030880		Hs6st2	5.55782	5.4596	5.40905	4.89359	5.19384	5.19633
ENSRNOG00000021410		Negr1	13.3054	13.7843	10.3074	11.2599	14.7733	14.849
ENSRNOG00000060846		Morc4	4.52112	4.01248	4.27203	3.67657	3.35798	3.45021
ENSRNOG00000060973		AABR07013843.1	6.38432	6.71001	4.5773	8.84021	7.26572	7.01397
ENSRNOG00000002358		Scpep1	25.591	25.1437	25.6918	24.9946	23.963	25.515
ENSRNOG00000059470		RF00100	0	0	0	0	0	0
ENSRNOG00000057448		RF00100	0.0686292	0	0	0	0	0
ENSRNOG00000053748		RF00026	0	0	0	0	0	0
ENSRNOG00000032371		LOC100909966	0	0	0	0	0	0
ENSRNOG00000058442		AABR07057510.1	0	0	0	0.0135568	0	0
ENSRNOG00000047714		Tmem37	0	0	0	0	0	0
ENSRNOG00000054532		AABR07018053.1	0	0	0	0	0	0
ENSRNOG00000039975		Tpbpa	0	0	0	0	0	0
ENSRNOG00000000854		Ncr3	0	0	0	0	0	0
ENSRNOG00000026659		AABR07057906.1	0	0	0	0	0	0
ENSRNOG00000015886		Cnnm4	9.84938	10.2627	9.52279	10.3534	9.59988	10.4046
ENSRNOG00000056904		Gtf3c2	28.749	29.468	30.2122	30.3322	28.9731	29.2025
ENSRNOG00000060549		LOC102552273	0	0	0	0	0	0
ENSRNOG00000061371		AABR07035541.3	0	0	0.22804	0.0479486	0	0
ENSRNOG00000028113		Whamm	8.18939	7.38576	7.82824	7.66801	7.55499	7.27757
ENSRNOG00000057905		RF00271	0	0	0	0	0	0
ENSRNOG00000030538		Slco1b2	0	0	0	0	0	0
ENSRNOG00000057490		RF00602	0.148533	2.37942	0.552183	0.348312	0.489631	0.744962
ENSRNOG00000008450		LOC100359539	16.3809	16.0488	20.7396	19.8781	21.1606	19.3007
ENSRNOG00000004998		Jakmip1	6.75489	6.80309	7.04599	10.7498	12.8584	12.8217
ENSRNOG00000001623		Zbtb21	9.95856	10.5501	11.1484	10.0309	10.2272	10.9746
ENSRNOG00000031216		AABR07055776.1	10.1408	8.02697	9.10325	7.16209	7.079	7.22823
ENSRNOG00000060631		RF00026	0	0	0	0	0	0
ENSRNOG00000011101		Twist1	22.4101	22.6703	15.8671	18.4569	19.2246	20.1848
ENSRNOG00000057640		RF00026	0	0	0	0	0	0
ENSRNOG00000056354		RF00100	0	0	0	0	0	0
ENSRNOG00000050460		AABR07017936.1	0	0	0	0	0	0
ENSRNOG00000030759		Nhs	0.608915	0.733181	0.743465	0.833728	0.73468	0.806413
ENSRNOG00000018949		Dlk2	0	0	0	0	0	0
ENSRNOG00000002529		Rap2c	8.43736	8.22192	10.0385	8.92026	8.97708	8.91791
ENSRNOG00000003069		Cd38	0	0	0	0	0	0
ENSRNOG00000021242		Adam33	0	0	0	0	0	0
ENSRNOG00000045913		Prdm16	0.0408807	0.0727653	0.0211079	0.131372	0.0486636	0.0455634
ENSRNOG00000056836		Cav1	0.0894218	0.0578784	0.158661	0.031772	0.0736934	0.040772
ENSRNOG00000014376		Proc	0.0661898	0.00981784	0.0512636	0.0862312	0.2091	0.177052
ENSRNOG00000049352		Olr1230	0	0	0	0	0	0
ENSRNOG00000055235		RF00003	0	0	0	0	0	0
ENSRNOG00000037175		Prss50	0.0198233	0.123495	0	0.123962	0.163366	0.0596538
ENSRNOG00000054298		AABR07021612.2	0	0	0	0	0	0
ENSRNOG00000010149		Cmc1	15.6267	15.0845	12.8652	15.1725	13.8922	14.1322
ENSRNOG00000015945		Cd3g	0	0	0	0	0	0
ENSRNOG00000009152		Caprin1	129.178	129.559	140.817	135.42	134.227	133.756
ENSRNOG00000003769		Tmem163	42.4307	43.5378	39.692	29.1393	30.7118	28.3399
ENSRNOG00000001512		AABR07029675.1	0	0	0	0	0	0
ENSRNOG00000047721		LOC103690041	0	0	0	0	0	0
ENSRNOG00000059826		RF00026	0	0	0	0	0	0
ENSRNOG00000046309		LOC102553138	0.0974749	0.0433749	0.0150987	0.0825428	0	0.00814802
ENSRNOG00000058301		RF00100	0	0.115306	0.0602068	0.253187	0.106773	0
ENSRNOG00000054186		Krtap1-5	0	0	0	0	0	0
ENSRNOG00000054324		RF00157	6.58058	2.10835	2.69102	4.11508	2.6031	2.1123
ENSRNOG00000042332		Slc44a5	0	0	0	0.00508273	0.00535868	0.0065225
ENSRNOG00000061166		AABR07029192.1	0	0	0	0	0	0
ENSRNOG00000030188		LOC103693040	0	0	0	0	0	0
ENSRNOG00000048161		Tlr9	0	0	0	0	0	0
ENSRNOG00000006878		Slc26a3	0.00735053	0.00654176	0	0.0114914	0.00605764	0
ENSRNOG00000018454		Apoe	0.827059	0.781124	0.690228	0.633295	0.973697	1.4222
ENSRNOG00000019041		Psme1	0	0	0.135285	0.0162546	0.0171371	0
ENSRNOG00000055852		AABR07031537.1	0	0	0	0	0	0
ENSRNOG00000027921		Rlf	8.49537	7.56979	8.60897	8.43266	7.48688	8.03007
ENSRNOG00000004426		Rps27a	1231.7	1587.64	1415.34	1228.31	1627.04	1354.72
ENSRNOG00000032004		Cyp2b21	0	0	0	0	0	0
ENSRNOG00000033256		LOC691141	0.175819	0.113799	0.415941	0.374817	0.368823	0.368759
ENSRNOG00000017907		Ube2i	267.758	254.515	263.965	248.283	272.612	270.991
ENSRNOG00000052192		LOC103694079	0.163095	0.14515	0	0	0	0.0817998
ENSRNOG00000052478		AABR07060235.1	0	0	0	0	0	0
ENSRNOG00000057273		AABR07062157.1	0	0.16901	0	0.0742218	0	0.190493
ENSRNOG00000012270		Med26	10.2679	10.8189	11.1876	9.78118	10.416	10.6785
ENSRNOG00000058991		AABR07016640.3	0	0	0	0	0	0
ENSRNOG00000007371		Rbmx2	154.252	153.927	162.688	157.128	153.142	159.331
ENSRNOG00000052497		AABR07061251.1	0	0	0	0	0	0
ENSRNOG00000043502		AABR07010717.1	0.0194889	0	0	0.0152339	0.016061	0.0977457
ENSRNOG00000027801		Zpbp	2.27501	1.67208	1.52045	1.55852	2.18032	1.33333
ENSRNOG00000014011		Dll4	0.0227961	0	0.00423732	0.0320744	0.00375731	0.0365866
ENSRNOG00000018524		Ezr	23.6946	24.1247	23.4924	35.5085	32.9991	35.7759
ENSRNOG00000004018		Tdrd5	0.638871	0.696786	0.762578	0.50918	0.428427	0.414666
ENSRNOG00000001397		Rbm19	12.7673	12.3406	13.8187	15.0246	15.158	14.9874
ENSRNOG00000060103		Bex4	90.6343	95.5399	85.3718	74.8075	68.2123	68.8287
ENSRNOG00000026302		Lrrn4cl	0.266059	0.26171	0.175695	0.213444	0.0692407	0.189627
ENSRNOG00000049751		Arid4b	0.723095	0.77928	1.13407	0.733024	0.367788	0.674331
ENSRNOG00000041913		RF00001	0	0	0	0	0	0
ENSRNOG00000056404		RF00026	0	0	0	0	0	0
ENSRNOG00000058288		Tcf19	87.7444	87.2771	79.7271	101.349	87.4236	86.5472
ENSRNOG00000020656		Pfkfb4	2.15907	2.24355	3.26217	2.57396	2.64412	3.30307
ENSRNOG00000053218		RF00377	0	0	0	0	0	0.191366
ENSRNOG00000052931		AABR07060769.1	0.0247555	0	0.115038	0	0	0
ENSRNOG00000051490		Plcg1	24.5973	25.3891	27.9313	25.2074	25.0499	26.1867
ENSRNOG00000058108		RF00100	0	0	0	0	0	0
ENSRNOG00000046834		C3	0.0283969	0.0216621	0.0377027	0.0602491	0.0133727	0.0325539
ENSRNOG00000059895		RF00156	0	0	0	0	0	0
ENSRNOG00000022603		Astl	0	0	0	0	0.00758613	0
ENSRNOG00000003738		Ush2a	0.0770664	0.0461188	0.0419871	0.108018	0.0777465	0.103962
ENSRNOG00000050071		Cdc45	6.14535	5.81662	5.25489	5.76997	6.4264	5.95877
ENSRNOG00000026046		Apex2l1	0	0	0	0	0	0
ENSRNOG00000018920		Slc25a17	24.3476	24.4499	22.9487	27.0105	23.0812	24.84
ENSRNOG00000054725		Gtf3c4	18.9671	18.1464	20.1097	19.1919	17.6275	18.9561
ENSRNOG00000003070		Pigl	8.06858	9.14239	7.04773	6.63515	8.02253	6.59327
ENSRNOG00000012817		Lrrc17	0.0100798	0.0179415	0.0093681	0.0078791	0.00830687	0
ENSRNOG00000030876		Krt72	0	0	0	0	0	0
ENSRNOG00000038044		Tsc22d2	8.09688	9.33904	8.85749	9.19912	8.00353	8.70165
ENSRNOG00000021216		Pex11b	18.2656	16.4664	17.7182	18.0234	16.6739	15.2807
ENSRNOG00000035607		Mir128-2	0	0	0	0	0	0
ENSRNOG00000039856		Lrrc73	66.4691	58.015	66.3023	61.8626	87.9826	76.9917
ENSRNOG00000061007		AABR07021888.1	0.159959	0.166085	0.322107	0.145874	0.439412	0.106969
ENSRNOG00000021619		Cela3b	0	0	0	0	0.0188942	0
ENSRNOG00000058765		AABR07049520.1	0	0	0	0	0	0
ENSRNOG00000001126		Fbxw8	38.8722	40.0633	41.7773	37.3459	37.2537	37.5824
ENSRNOG00000060391		AABR07027190.2	0.0194706	0	0	0	0	0.0195308
ENSRNOG00000050159		AABR07061113.1	0	0	0	0	0	0
ENSRNOG00000051265		AABR07058423.3	0	0	0	0	0	0
ENSRNOG00000007990		Adipor2	74.7744	73.0019	79.82	77.0208	79.0203	78.5567
ENSRNOG00000057786		RF02271	0	0	0	0	0	0
ENSRNOG00000010552		Lamtor3	38.9277	41.7354	31.8862	37.1131	38.2223	36.1027
ENSRNOG00000011696		Lifr	2.25005	2.37344	2.46064	2.52205	2.19143	2.43122
ENSRNOG00000062065		AABR07044444.2	0	0.0290073	0.121169	0.0254774	0.0537212	0
ENSRNOG00000005350		Pwp1	14.0586	13.0069	14.5606	12.9341	13.6863	13.0774
ENSRNOG00000042265		LOC689968	0	0	0	0	0	0
ENSRNOG00000046427		AABR07036649.1	0	0	0.0536844	0	0	0
ENSRNOG00000059247		Olr569	0	0	0	0	0	0
ENSRNOG00000005900		Slc2a6	24.218	25.5141	24.2807	24.9629	25.7056	25.1563
ENSRNOG00000036869		Tmem88b	0	0	0	0	0	0
ENSRNOG00000053996		AABR07044492.1	0	0	0	0	0	0
ENSRNOG00000061698		AABR07027811.4	0	0	0	0	0	0
ENSRNOG00000052256		Dact3	11.0168	12.0957	10.7491	11.7778	13.3404	12.9857
ENSRNOG00000015924		Olr110	0	0	0	0	0	0
ENSRNOG00000017341		Olr184	0	0	0	0	0	0
ENSRNOG00000054168		RF00026	0	0	0	0	0	0
ENSRNOG00000025823		Rbm46	0	0	0	0	0	0
ENSRNOG00000015939		Ccdc25	13.5461	13.4547	13.9244	12.3483	12.467	12.712
ENSRNOG00000041515		AABR07062500.1	0	0.160927	0	0.282688	0	0
ENSRNOG00000007949		Rgn	0	0.0232495	0	0.0306305	0	0
ENSRNOG00000015416		Nabp1	2.08129	2.76218	2.57912	1.79814	2.18915	2.0511
ENSRNOG00000009086		Apcs	0	0	0	0	0	0
ENSRNOG00000060833		AABR07059527.1	0.10269	0.228477	0.334036	0.160539	0	0.566539
ENSRNOG00000005732		Tas2r13	0	0	0	0	0	0
ENSRNOG00000015413		Qpctl	20.6026	19.8481	19.9688	16.6148	17.588	17.3247
ENSRNOG00000052795		Itpr3	11.6221	11.0624	12.8565	13.5643	10.9426	12.7575
ENSRNOG00000024177		AC096601.1	1.00619	0.298494	0.883195	0.961292	0.737078	0.728942
ENSRNOG00000013263		Ccdc151	0.757018	0.640454	0.93809	0.33605	0.385103	0.46874
ENSRNOG00000003533		Clcn4	0.513626	0.640811	0.312292	0.393982	0.478667	0.380392
ENSRNOG00000013570		Rad54l2	1.46474	1.79558	1.31741	1.76544	1.30835	1.86266
ENSRNOG00000027370		AC120712.1	0	0	0	0	0	0
ENSRNOG00000052686		RF00619	0	0	0	0	0	0
ENSRNOG00000002488		Galnt10	31.7016	31.1449	31.3225	32.5191	35.7547	36.9888
ENSRNOG00000058011		AABR07018244.2	0.583027	0.24983	0.341172	0.455736	0.373706	0.433208
ENSRNOG00000046797		Rpusd2	0.0811938	0.128463	0.100615	0.0634669	0.0669127	0.0904943
ENSRNOG00000014900		Crem	79.6984	72.2536	74.0026	44.1113	60.7246	52.3632
ENSRNOG00000004831		Arid2	13.0962	12.972	13.4578	14.459	12.2512	13.1047
ENSRNOG00000002660		Magee1	7.03254	7.13509	7.31576	7.5375	6.58786	7.17702
ENSRNOG00000010241		Hspb11	15.1558	17.1938	14.0415	17.0543	17.9214	16.2528
ENSRNOG00000054667		AABR07049288.1	0	0	0	0	0	0
ENSRNOG00000043668		AC105645.1	0	0	0	0	0	0
ENSRNOG00000009820		Bnip3l	19.7351	18.4951	20.8307	17.9974	18.5674	18.642
ENSRNOG00000017571		Ndufa2	90.9765	103.34	91.3517	90.4451	95.4168	81.8713
ENSRNOG00000061467		AABR07043772.1	0.377227	0.0139884	0.204512	0.110575	0.0259064	0
ENSRNOG00000033343		Prss36	1.80414	1.80808	1.57469	1.59419	1.86821	1.99069
ENSRNOG00000057017		AABR07030563.1	0.556235	0.304636	1.07369	0.869586	0.211569	0.772553
ENSRNOG00000028904		Vps9d1	5.31992	5.76919	5.76715	5.687	4.75219	6.24764
ENSRNOG00000028302		LOC103694876	0	0	0	0	0	0.0112356
ENSRNOG00000057702		Insrr	26.5414	28.2216	29.2202	45.6539	38.1253	40.8944
ENSRNOG00000003732		Flrt2	2.01493	2.02935	2.29251	2.52226	1.6428	1.90608
ENSRNOG00000027596		Mbd5	2.94623	3.76013	3.4643	3.60031	2.83482	3.28675
ENSRNOG00000039300		Ahcyl2	18.8521	18.3899	20.0577	21.6397	21.8857	22.4458
ENSRNOG00000036300		AABR07003344.1	0	0	0	0	0	0
ENSRNOG00000054977		RF00001	0	0	0	0	0	0
ENSRNOG00000060719		AABR07043407.1	9.11003	8.69518	8.52816	9.33993	9.03097	4.17179
ENSRNOG00000058190		RF00004	0	0	0	0	0	0
ENSRNOG00000011006		Stoml3	0	0	0	0	0	0
ENSRNOG00000016873		Msrb2	25.2144	25.4386	28.5519	26.8739	30.1242	27.2365
ENSRNOG00000059604		AABR07012274.1	2.51076	1.63133	2.20464	2.16728	2.93234	3.24472
ENSRNOG00000060065		AABR07063682.1	0	0	0	0	0	0
ENSRNOG00000053167		RF00026	0.623839	3.14613	1.54611	1.95055	0.514112	1.46013
ENSRNOG00000000903		Asl	13.3904	13.0343	12.8122	12.1659	11.5237	10.4586
ENSRNOG00000052032		RF00026	0	0	0	0	0	0
ENSRNOG00000041735		RF00001	0	0	0	0	0	0
ENSRNOG00000054705		RF00560	0.155184	0.276218	0	0	0	0
ENSRNOG00000054628		AC105485.1	0	0	0	0	0	0
ENSRNOG00000003703		Mcm6	79.0367	82.877	84.8983	86.7561	89.4336	90.1933
ENSRNOG00000054587		AABR07060920.1	0	0	0	0	0	0
ENSRNOG00000060986		RF00015	0	0	0	0	0	0
ENSRNOG00000055557		LOC108348261	0	0	0	0	0	0
ENSRNOG00000016849		Ppp2r5d	26.2246	20.6186	29.5223	22.2125	19.3579	21.9987
ENSRNOG00000028899		LOC100910807	0.0243592	0.0361317	0.0150929	0.0126939	0.0133831	0.0162897
ENSRNOG00000060298		AABR07013314.1	0	0	0	0	0	0
ENSRNOG00000002928		Guk1	137.844	133.672	119.047	140.053	141.944	139.586
ENSRNOG00000039234		Zscan21	30.001	27.9618	30.4566	28.3642	28.2684	26.3107
ENSRNOG00000055538		Vom1r12	0	0.0200941	0	0	0	0
ENSRNOG00000017386		Il11	0.840794	1.64355	1.11633	0.845003	0.81664	0.963879
ENSRNOG00000040385		Mir760	3.63906	6.93999	2.89896	3.25092	2.99899	4.69326
ENSRNOG00000037229		Gmppb	18.5021	17.0149	16.4018	14.4541	13.0734	14.752
ENSRNOG00000059318		RF02271	0	0	0	0	0	0
ENSRNOG00000050635		AC134024.1	2.34306	3.6492	0.544406	2.28938	2.65504	1.76273
ENSRNOG00000050123		Gdf5	0	0	0	0.0136593	0	0
ENSRNOG00000061278		RF00100	0	0	0	0	0	0
ENSRNOG00000048218		AABR07065115.1	0	0	0	0	0	0
ENSRNOG00000027271		RGD1359290	40.5856	36.6504	36.9621	34.4215	35.7475	30.0142
ENSRNOG00000054878		AABR07022202.1	0	0	0	0	0	0
ENSRNOG00000010109		Nol9	6.71827	7.02303	7.68551	7.03228	7.64577	7.57535
ENSRNOG00000059448		Vom1r84	0	0	0	0	0	0
ENSRNOG00000029862		Spc24	50.5322	49.8288	49.422	47.4107	52.1839	49.3863
ENSRNOG00000017708		AABR07073038.1	380.3	364.969	315.031	352.898	361.579	378.977
ENSRNOG00000046184		RGD1561143	0	0	0	0	0	0
ENSRNOG00000006735		Cdkn2b	0	0	0	0	0	0
ENSRNOG00000025049		Lrrc72	0	0	0.246196	0	0.0545767	0
ENSRNOG00000023065		Zfp637	39.4432	40.0758	39.4265	33.8685	39.1835	35.5381
ENSRNOG00000062259		AABR07059364.1	0	0	0	0	0	0
ENSRNOG00000008257		Mfap2	0.0201109	0	0.0186909	0.0786005	0.0828679	0
ENSRNOG00000059774		RF00100	0	0	0	0	0	0
ENSRNOG00000050874		LOC102552549	4.40385	4.77861	2.7359	2.77966	3.90096	4.3466
ENSRNOG00000006450		Erbb2	0	0	0	0.00391677	0	0.00502625
ENSRNOG00000052958		AABR07007663.1	0	0	0	0	0	0
ENSRNOG00000053508		AABR07038355.2	0	0	0	0	0	0
ENSRNOG00000009364		Ndufb9	238.813	251.207	200.1	223.754	260.659	230.159
ENSRNOG00000013443		Tm9sf3	249.445	247.812	240.294	211.349	215.196	217.369
ENSRNOG00000050416		Kcna10	0	0	0	0	0	0
ENSRNOG00000006559		Akap8	21.3825	21.0168	21.9754	20.5248	20.2053	22.9079
ENSRNOG00000057977		AABR07045086.1	0	0.108863	0	0.0956152	0	0
ENSRNOG00000030269		Atp2b2	20.1497	19.9611	22.8479	21.8502	19.6044	20.9551
ENSRNOG00000017381		Itih4	0.04997	0.0254125	0.00663453	0.0390601	0.0294148	0.0143213
ENSRNOG00000046006		C12H7orf61	0	0	0	0	0	0
ENSRNOG00000036402		AABR07026936.1	0	0	0	0	0	0
ENSRNOG00000014979		Themis	0	0	0	0	0	0
ENSRNOG00000052064		Parvg	0	0.0291903	0.00762082	0	0	0
ENSRNOG00000055435		RF00026	0	0	0	0	0	0
ENSRNOG00000057389		Dusp28	7.80572	7.59642	7.99039	6.36259	6.61628	5.8817
ENSRNOG00000010450		Elovl7	11.7535	13.782	12.755	16.2546	16.0481	18.9056
ENSRNOG00000000546		Nt5dc1	4.80949	4.91442	4.85859	4.06213	4.26353	4.2184
ENSRNOG00000059859		AC106663.2	82.3939	89.7397	134.555	98.1408	85.6854	96.817
ENSRNOG00000001777		AABR07034428.1	0	0	0	0	0	0
ENSRNOG00000058554		AABR07058332.1	0	0	0	0	0	0
ENSRNOG00000055326		RF00026	0	0	0	0	0	0
ENSRNOG00000056025		RF00416	0	0	0	0	0	0
ENSRNOG00000051197		AABR07039325.1	0	0	0	0	0	0
ENSRNOG00000029027		Olr343	0	0	0	0	0	0
ENSRNOG00000051738		RF00560	0	0	0	0	0	0
ENSRNOG00000017969		Olfm3	0.614445	0.564916	0.67489	0.686701	0.640286	0.606157
ENSRNOG00000057285		AABR07021544.2	0	0	0	0	0	0
ENSRNOG00000020374		Tmem8a	25.2584	27.1894	25.4144	31.5494	29.7431	32.4715
ENSRNOG00000012703		Crh	0	0	0.0161592	0.0543631	0	0
ENSRNOG00000010557		Smarcd2	33.6671	34.0881	33.7067	31.941	32.1578	32.2402
ENSRNOG00000047567		AABR07044952.1	0	0.192777	1.40922	0	0	0
ENSRNOG00000051457		LOC100911649	0	0	0	0	0	0
ENSRNOG00000049556		AABR07071445.1	0.236303	1.05151	1.09809	0.738844	3.50531	3.08143
ENSRNOG00000014461		Galns	0.762847	0.895158	1.0556	1.17934	0.912735	0.838892
ENSRNOG00000059738		AABR07033484.1	0	0	0	0	0	0
ENSRNOG00000018985		Grk2	85.6578	86.9293	89.0417	85.0616	82.4969	90.2425
ENSRNOG00000023847		Nlrp14	0	0	0	0	0	0
ENSRNOG00000059075		AABR07043429.2	0	0.00961883	0.0301347	0	0.008907	0
ENSRNOG00000054190		RF00026	0	0	0	0	0	0
ENSRNOG00000058496		RF00026	0	0	0	0	0	0
ENSRNOG00000028017		Tmem109	229.104	223.656	210.617	240.826	240.545	237.174
ENSRNOG00000019496		Stat5a	4.24298	4.65228	4.48381	4.27965	3.72442	4.54485
ENSRNOG00000062181		AABR07072236.1	3.91893	3.1633	5.16688	2.95646	2.54114	3.13875
ENSRNOG00000006782		RGD1560028	0.0166624	0	0	0.078147	0	0.0668556
ENSRNOG00000055562		Dkc1	40.4664	40.1287	36.801	41.3463	45.3783	43.8822
ENSRNOG00000041847		RF00001	0	0	0	0	0	0
ENSRNOG00000021547		Pgr15l	0	0	0	0	0	0
ENSRNOG00000055678		AABR07022981.1	0	0	0	0	0	0
ENSRNOG00000041875		AC119762.1	0	0	0	0	0	0
ENSRNOG00000011394		Kif3c	17.7536	18.8693	19.4621	20.7045	20.5104	19.8767
ENSRNOG00000020084		Pcdhb5	34.2552	31.1453	31.2455	39.9348	40.4775	41.3626
ENSRNOG00000003699		Endov	12.0319	13.4676	11.6679	12.8034	12.9847	13.7764
ENSRNOG00000007692		Ift52	51.0076	53.4244	51.7021	44.6371	41.9133	44.7013
ENSRNOG00000052802		Aldoa	557.335	547.693	532.364	548.172	545.504	532.446
ENSRNOG00000058820		Olr1768	0	0	0	0	0	0
ENSRNOG00000058044		RF00026	0	0	0	0	0	0
ENSRNOG00000016484		Gstk1	10.9194	12.4281	8.83435	11.9019	10.0922	9.33852
ENSRNOG00000037931		Plaur	0.527247	0.581852	0.705629	0.0164854	0.191184	0.0634653
ENSRNOG00000046292		AABR07017635.1	0	0	0	0	0	0
ENSRNOG00000023285		AABR07061842.1	1.89042	2.71926	2.94186	2.31963	1.99268	1.98447
ENSRNOG00000061066		RF00026	0	0	0	0	0	0
ENSRNOG00000049034		Ptrh1	12.2755	12.8054	10.5672	11.2471	11.3049	11.9771
ENSRNOG00000032238		Plcd1	0.272717	0.188774	0.24642	0.165803	0.118617	0.258362
ENSRNOG00000033123		Pcdhb20	0.615955	0.679746	0.572464	0.625917	0.32995	0.654931
ENSRNOG00000001607		Adamts1	0.00472605	0.00841211	0	0.00369422	0.0116844	0.00948134
ENSRNOG00000048206		Olr844	0	0	0	0	0	0
ENSRNOG00000059065		RF00003	0	0	0	0	0	0
ENSRNOG00000049261		LOC100909648	0	0	0	0	0	0
ENSRNOG00000052085		AABR07049688.1	0	0	0	0	0	0
ENSRNOG00000055905		RF00560	0	0	0	0	0	0
ENSRNOG00000052098		RF00560	0	0	0	0	0	0
ENSRNOG00000004201		Rims2	8.7642	8.7874	9.87449	10.1962	8.76621	9.39385
ENSRNOG00000002659		Ciita	0	0.0324995	0.022626	0	0.00334382	0
ENSRNOG00000054807		RF00100	0.0828472	0.294926	0	0.0647593	0.204826	0.0831034
ENSRNOG00000052610		RF00100	0	0	0	0	0	0
ENSRNOG00000032241		Fscb	0	0	0	0	0	0
ENSRNOG00000027942		Eps8l1	0.0380257	0.0386764	0.0100974	0.00849246	0.0134303	0.0272452
ENSRNOG00000061975		AABR07035383.2	0	0	0	0.0337933	0	0
ENSRNOG00000059556		RF00340	0	0.420605	0	0	0	0
ENSRNOG00000050223		Rin1	0	0	0.00781812	0.00328774	0.0138649	0.0168762
ENSRNOG00000016057		Kcnj13	0.264689	0.853926	0.384375	0.258625	0.231766	0.298696
ENSRNOG00000043188		AABR07000261.1	0	0	0	0	0	0
ENSRNOG00000052652		LOC100910640	0	0	0	0	0	0
ENSRNOG00000035556		Mir379	0	0	0	0	0	0
ENSRNOG00000026196		Lrrd1	0	0.00673458	0.0421974	0.0236602	0.0436534	0.0683153
ENSRNOG00000060025		AC111231.3	0	0	0	0	0	0
ENSRNOG00000001335		Zkscan1	47.648	48.6529	54.3874	44.6547	45.4239	46.419
ENSRNOG00000001182		Ndufv3	196.737	212.393	177.089	217.421	243.936	214.273
ENSRNOG00000026649		Dnmt3a	31.8649	31.4883	36.7413	31.3978	28.845	30.9945
ENSRNOG00000028712		Dynap	0	0	0	0	0	0
ENSRNOG00000004242		Pole2	4.43848	5.22681	4.80881	4.79203	5.2846	5.5714
ENSRNOG00000061174		AC128986.1	1.99459	0.981985	1.65655	2.02353	1.67873	1.6602
ENSRNOG00000057611		RF00100	0	0	0	0	0	0
ENSRNOG00000019311		Nfkb2	14.0347	14.4436	13.6859	15.6192	14.3795	15.3622
ENSRNOG00000049470		Tex12	0	0	0	0	0	0
ENSRNOG00000058557		AABR07063286.1	0.103973	0	0.096632	0.243819	0	0
ENSRNOG00000007636		Cadps2	4.95989	4.70981	5.14999	5.16453	5.2282	4.81787
ENSRNOG00000018623		Rev1	12.7786	12.9657	13.6897	14.0784	12.5674	13.7506
ENSRNOG00000020952		Cgn	0.645238	0.93042	0.967838	1.96	1.78708	2.30628
ENSRNOG00000060743		AC112093.1	0	0.415879	0	0.730543	0.192551	0
ENSRNOG00000016325		F2	0.0100896	0.0359178	0.0562632	0.134075	0.0748344	0.101208
ENSRNOG00000061255		RF00026	0	0	0	0	0	0
ENSRNOG00000002106		Usp46	23.1009	25.5738	25.3232	23.7502	23.8655	24.7616
ENSRNOG00000049396		AABR07027731.1	0	0	0	0	0	0
ENSRNOG00000061466		AABR07009031.1	0.0521823	0	0	0	0.021502	0.0261718
ENSRNOG00000015598		Zfp772	2.22625	1.64382	1.81895	1.88362	1.05847	1.04295
ENSRNOG00000056862		AC129049.2	0	0	0	0	0	0
ENSRNOG00000059969		AABR07021762.1	0	0	0	0	0	0
ENSRNOG00000021365		Ybey	2.40934	2.65936	2.64158	2.48656	2.35397	2.51591
ENSRNOG00000012460		Cntf	6.34864	7.40942	7.91428	7.85985	6.35983	7.41694
ENSRNOG00000001806		Fetub	0.13618	0.0363588	0.101252	0.127737	0.29179	0.327842
ENSRNOG00000054209		RF00045	0	0	0	0	0	0
ENSRNOG00000033714		AABR07006264.1	0	0	0	0	0	0
ENSRNOG00000051658		RF00560	0	0	0	0	0	0
ENSRNOG00000056424		RF00026	0	0.518878	0.180621	0	0	0
ENSRNOG00000043588		AABR07061530.1	0	0	0	0	0	0
ENSRNOG00000060188		AC141526.2	7.83175	5.7683	5.27084	5.69966	7.78958	5.6888
ENSRNOG00000001337		Setd1b	11.8112	11.2614	13.4528	12.7463	11.2173	11.9179
ENSRNOG00000019754		Gdap2	9.58515	9.58745	9.37124	9.74436	9.42097	8.92308
ENSRNOG00000048257		Olr1496	0	0	0	0	0	0
ENSRNOG00000059767		RF00026	0	0	0	0	0	0
ENSRNOG00000030294		Eml4	20.4493	19.9236	21.3776	16.597	16.2866	16.9888
ENSRNOG00000014253		Pax2	0	0.0175752	0.0183537	0	0.0162745	0
ENSRNOG00000047257		Tmem185b	30.2737	33.6037	31.3297	28.8044	29.3918	31.8926
ENSRNOG00000042105		Lce1l	0	0	0	0	0	0
ENSRNOG00000061097		Lrit3	0	0	0	0	0	0
ENSRNOG00000061702		RF00009	0	0	0	0	0	0
ENSRNOG00000058029		RF00410	0	0	0	0	0	0
ENSRNOG00000041892		RF00001	0	0	0	0	0	0
ENSRNOG00000058007		Nde1	4.84854	5.77634	4.94605	5.48866	4.10717	3.68156
ENSRNOG00000052685		LOC108348067	0	0	0	0	0	0
ENSRNOG00000023286		AABR07049408.1	0	0	0	0	0	0
ENSRNOG00000021255		Smox	2.98923	2.98953	3.02904	2.46163	2.55408	2.8681
ENSRNOG00000004686		Spop	43.2464	39.774	41.8363	38.0063	36.0811	38.3529
ENSRNOG00000017318		Zfp322a	2.3142	2.05367	2.07069	1.56015	1.62846	1.65621
ENSRNOG00000002911		Alb	0	0	0	0	0	0
ENSRNOG00000018849		Tcerg1	27.9099	28.1453	30.5902	28.8744	26.8532	30.0002
ENSRNOG00000053382		Olr363	0	0	0	0	0	0
ENSRNOG00000026870		Clic6	0.148786	0.315275	0.190959	0.332291	0.437915	0.461953
ENSRNOG00000059354		RF00100	0	0	0	0	0	0
ENSRNOG00000009576		Xpa	5.42319	6.73248	4.87975	5.26519	6.13462	5.90772
ENSRNOG00000054037		AABR07036406.1	0	0	0	0	0	0
ENSRNOG00000011416		Vegfc	0.839596	0.669019	1.14325	0.961538	0.901104	0.930328
ENSRNOG00000021173		Vps45	30.5044	29.1507	29.5899	27.5253	29.698	26.7843
ENSRNOG00000019221		Gstm4	51.9091	51.2141	54.0364	52.676	58.9142	51.5676
ENSRNOG00000058793		LOC100912478	0.39674	0.304385	0.24158	0.331508	0.191665	0.301906
ENSRNOG00000047945		Cyp2c12	0	0.0643336	0.0111972	0.00941748	0	0.0845959
ENSRNOG00000019043		Pdcd1	0	0	0	0	0	0
ENSRNOG00000057500		RF00600	0.145417	0	0	0	0	0
ENSRNOG00000009039		Trappc12	8.63461	9.35835	8.06741	8.45762	8.49637	9.19596
ENSRNOG00000052550		Olr1314	0	0	0	0	0	0
ENSRNOG00000061403		AABR07039446.2	0	0	0	0	0	0
ENSRNOG00000055093		Fgfr1op	4.9876	5.00523	5.34162	4.80226	4.90778	4.29296
ENSRNOG00000012108		Thsd1	0.131612	0.0266206	0.138999	0.173021	0.0493011	0.0840118
ENSRNOG00000053695		AABR07051957.1	0	0	0	0	0	0
ENSRNOG00000023536		Adgrd1	0.0936695	0.0138939	0.021764	0.11593	0.122224	0.133109
ENSRNOG00000018671		Commd4	31.0273	31.8632	29.5799	26.6987	31.0561	27.6546
ENSRNOG00000052392		RF00007	0	0.126758	0	0	0	0
ENSRNOG00000013240		Ptger4	0.0564688	0.0628195	0.0656022	0.0882801	0.0349024	0.0141609
ENSRNOG00000051656		RF00026	0	0	0.743323	0	0	0
ENSRNOG00000008857		Adamts10	7.42865	8.98663	8.47149	8.26347	7.20171	7.38172
ENSRNOG00000053026		Shcbp1	23.5065	23.5573	22.5961	24.0954	27.9319	24.3774
ENSRNOG00000054794		AABR07007874.1	0	0	0	0	0	0
ENSRNOG00000029244		Pcdhb10	17.3296	15.3005	16.8983	15.5846	15.0067	16.3488
ENSRNOG00000029911		Cilp	0.00503746	0.0179328	0.00468178	0.00787528	0.0207571	0.0202122
ENSRNOG00000058559		AABR07032563.2	0	0	0.0140351	0	0	0
ENSRNOG00000038619		AABR07018155.1	0.158435	0.0705015	0.368122	0.0309611	0.16321	0.158925
ENSRNOG00000000653		Nr5a2	0.114419	0.113144	0.153603	0.159001	0.0873093	0.0552611
ENSRNOG00000023529		Rpl5	599.874	603.638	585.27	558.859	624.998	590.646
ENSRNOG00000055866		AABR07008948.1	0	0	0	0	0	0
ENSRNOG00000051238		Mphosph8	0.705491	0.607281	0.408456	0.759391	0.924525	0.313232
ENSRNOG00000055260		AABR07071567.2	0	0	0	0	0	0
ENSRNOG00000024780		MGC95210	3.06292	3.59662	3.23889	3.14895	3.009	3.35462
ENSRNOG00000052053		RF00066	0	0	0	0	0	0
ENSRNOG00000061527		Gck	39.8817	39.073	42.1572	39.9555	39.1174	43.2656
ENSRNOG00000033583		LOC100910577	2.32249	1.77928	2.02499	1.61891	1.99291	1.54911
ENSRNOG00000014105		AC103056.1	0	0	0	0	0	0
ENSRNOG00000035635		Mir448	0	0	0	0	0	0
ENSRNOG00000035530		Mir192	0	0	0	0	0	0
ENSRNOG00000010761		Sftpb	0	0	0	0	0	0
ENSRNOG00000005144		Tmem18	7.7968	8.80059	8.14766	6.92696	7.71834	7.2868
ENSRNOG00000011631		Fst	0.910714	0.574111	0.634809	0.296616	0.547261	0.133223
ENSRNOG00000049670		AABR07017597.1	0	0	0	0	0	0
ENSRNOG00000014743		Hagh	54.0063	53.91	48.1201	41.6661	46.4177	43.8848
ENSRNOG00000026791		Pgbd5	18.3378	18.276	16.5421	19.828	20.0758	19.5696
ENSRNOG00000017473		Ttc25	9.58135	8.21527	11.6591	11.872	15.6932	14.4416
ENSRNOG00000004515		Pes1	39.1111	40.2326	44.0207	42.2416	38.8528	39.1719
ENSRNOG00000049160		AABR07067441.2	0	0	0	0	0	0
ENSRNOG00000004135		RGD1311745	10.3177	10.9529	11.8078	10.014	11.6287	11.5469
ENSRNOG00000052807		AABR07019137.1	0	0	0.061549	0	0	0
ENSRNOG00000060396		AABR07044807.1	0.0597547	0.02659	0	0.0233543	0.0492445	0
ENSRNOG00000014258		Rab32	0.0386159	0.0229113	0.0358893	0.0402466	0.0689514	0.00645588
ENSRNOG00000045036		RF00001	0	0	0	0	0	0
ENSRNOG00000042099		AABR07025051.2	0	0	0	0	0	0
ENSRNOG00000008481		Reep1	8.58909	9.47962	8.97522	16.206	17.2116	17.0272
ENSRNOG00000048273		Apod	0.367855	0.308123	0.261439	0.845712	1.24828	0.998451
ENSRNOG00000005301		Eif2b4	38.7609	38.2778	37.6285	41.0205	40.271	38.601
ENSRNOG00000057580		AABR07049866.1	0	0	0	0	0	0
ENSRNOG00000061617		RF00560	0	0	0	0	0	0
ENSRNOG00000054894		RF00026	0	0	0	0	0	0
ENSRNOG00000061700		AABR07008844.1	0	0	0	0	0	0
ENSRNOG00000056654		Dnaaf4	0.438001	0.733212	0.668767	0.529863	0.455499	0.648573
ENSRNOG00000013135		Ptpn12	20.6027	18.46	20.4537	18.7579	17.0939	18.268
ENSRNOG00000051526		RF00100	0	0	0	0	0	0
ENSRNOG00000035489		Mir3545	0	0	0	0	0	0
ENSRNOG00000006311		Ccr9	0	0	0	0	0.00667332	0
ENSRNOG00000025895		Cavin2	0	0	0	0	0	0
ENSRNOG00000019585		Kat8	20.9878	19.0347	21.404	18.8217	19.8663	18.7274
ENSRNOG00000009001		Mtss1	22.2823	23.1455	21.7003	27.9517	25.5253	27.7333
ENSRNOG00000052810		Cyp2c11	0	0.0108799	0	0.00955589	0.0503735	0
ENSRNOG00000013017		Arnt2	6.42895	6.9385	6.84502	6.54364	6.42503	7.08936
ENSRNOG00000059782		RF00100	0	0	0.130584	0	0	0
ENSRNOG00000060133		AABR07034111.1	0	0	0	0	0	0
ENSRNOG00000047895		Mettl1	10.5121	9.10672	8.5359	9.09882	9.42827	8.63198
ENSRNOG00000054025		RF00026	0	0	0	0	0	0
ENSRNOG00000024335		Fastkd1	1.24592	1.3431	1.25037	1.08821	0.944829	1.02094
ENSRNOG00000006753		Tgm3	0.101209	0.187076	0.137477	0.456418	0.314383	0.343614
ENSRNOG00000059424		AC104053.2	0	0	0.0171638	0	0	0
ENSRNOG00000053042		LOC103694540	0	0	0	0	0	0
ENSRNOG00000052283		AABR07070345.1	0	0	0	0	0	0
ENSRNOG00000026060		Arsi	0	0	0	0	0	0
ENSRNOG00000051501		RF00092	0	0	0.17103	0	0	0.184592
ENSRNOG00000017073		Car9	0.91593	0.868898	1.02899	1.17228	1.5926	0.757222
ENSRNOG00000049888		LOC686683	0	0	0	0	0	0
ENSRNOG00000027645		Syndig1l	10.7453	10.1403	8.98902	9.37658	10.9549	11.8315
ENSRNOG00000061717		RF00026	0	0.177948	0.185831	0	0	0.200567
ENSRNOG00000004813		Rtcb	56.232	54.2473	60.2971	57.6275	56.4811	58.8965
ENSRNOG00000011814		Cbx3	175.759	171.988	184.913	163.078	169.844	183.293
ENSRNOG00000059101		RF00003	0	0	0	0	0	0
ENSRNOG00000054276		RF00026	0	0	0	0	0	0
ENSRNOG00000052353		RF00026	0	0.172959	0.903103	0	0	0
ENSRNOG00000003728		Xylt2	9.53734	10.2288	10.6317	10.0596	9.69415	9.61419
ENSRNOG00000035640		Mir30e	0	0.201159	0.21007	0	0	0
ENSRNOG00000005365		Kcnip1	62.8202	63.0836	64.9769	50.5193	54.8466	52.6741
ENSRNOG00000058522		Fam214a	2.43623	2.96089	2.76091	2.48391	2.59893	2.78667
ENSRNOG00000045994		Mir6333	1.31137	2.00072	4.00457	1.75725	3.55093	0.939592
ENSRNOG00000022296		Pnpla5	0	0	0	0	0	0.0095116
ENSRNOG00000061088		Atf1	42.4484	42.5044	41.9555	41.5522	37.7981	41.5318
ENSRNOG00000006804		Ppp1r42	0	0	0	0	0.0160911	0
ENSRNOG00000036668		Ogfod3	27.0615	27.436	23.8271	27.5734	29.8399	29.6534
ENSRNOG00000035957		RF00001	0	0	0	0	0	0
ENSRNOG00000015292		Cul2	27.7793	27.2729	28.573	26.7657	28.0738	26.4309
ENSRNOG00000046937		LOC103690038	0.0101338	0	0	0	0	0.0203304
ENSRNOG00000049643		AABR07066818.2	0.167699	0	1.09101	0	0	0
ENSRNOG00000052934		Nol11	28.4116	27.3132	25.9659	26.8797	26.8592	27.5311
ENSRNOG00000002919		Gfap	0	0	0	0	0	0
ENSRNOG00000022619		Fth1	0	0	0	0	0	0
ENSRNOG00000054749		AC125620.1	0	0	0	0	0	0
ENSRNOG00000031320		LOC499565	0	0	0	0	0	0
ENSRNOG00000050482		Dbf4	2.51388	2.54147	1.95723	2.79241	2.88041	3.15207
ENSRNOG00000055627		AC114070.1	0	0	0	0	0	0
ENSRNOG00000053574		Tarbp1	1.56576	1.01771	1.17724	1.17234	0.888025	1.10736
ENSRNOG00000003143		RGD1310166	0	0.0193787	0	0.0170205	0	0
ENSRNOG00000028910		Ccdc9b	8.70164	10.3328	10.5549	10.6603	9.97591	11.6704
ENSRNOG00000048681		AABR07007064.1	0	0	0	0	0	0
ENSRNOG00000052642		RF00003	0	0	0	0	0	0
ENSRNOG00000029292		LOC500877	9.73532	10.189	11.8347	11.5974	12.4517	12.031
ENSRNOG00000046182		Olr1395	0	0	0	0	0	0
ENSRNOG00000058763		RF00026	0	0	0	0	0	0
ENSRNOG00000058327		AABR07052458.1	0.0242362	0	0.0900997	0.0947236	0.17976	0
ENSRNOG00000058833		AABR07043601.4	0	0	0	0	0	0
ENSRNOG00000047666		AABR07028480.7	0	0	0	0	0	0
ENSRNOG00000015703		Hypk	175.048	173.678	171.46	150.626	160.693	145.103
ENSRNOG00000059289		RF00413	0	0	0	0	0	0
ENSRNOG00000058480		AC119699.2	0	0	0	0	0	0
ENSRNOG00000002039		Evi5	12.8926	12.8634	14.2931	14.3334	13.5984	14.8138
ENSRNOG00000052311		RF01518	0	0	0	0	0	0
ENSRNOG00000051935		AABR07036442.1	0	0	0	0	0	0
ENSRNOG00000015788		LOC100911796	0	0	0	0	0	0
ENSRNOG00000060564		AABR07064690.1	0	0	0	0	0	0
ENSRNOG00000000955		Lnx2	12.6683	12.8056	14.4217	13.6913	12.1324	12.3084
ENSRNOG00000026646		Ndufs5	328.643	363.064	234.699	328.211	353.596	306.358
ENSRNOG00000057424		RF00560	0	0	0	0	0	0
ENSRNOG00000010330		Mark3	49.9025	47.2579	49.8345	55.2073	55.1022	57.3134
ENSRNOG00000010091		Efcab14	27.4073	27.6637	28.5246	30.3717	27.1058	29.3709
ENSRNOG00000030704		AC094053.1	24.0929	22.0964	23.9123	25.0604	24.5671	27.1179
ENSRNOG00000019624		Morc2	24.3627	24.8331	26.7845	25.8319	24.4373	26.0415
ENSRNOG00000013200		AC113771.1	0.925288	5.50432	2.3083	1.75108	3.6923	3.2241
ENSRNOG00000028879		Slc4a8	4.88808	5.55922	5.61663	5.30928	3.9709	5.11865
ENSRNOG00000058369		RF00019	0	0	0	0	0	0
ENSRNOG00000014783		Pgghg	19.242	19.7127	21.8037	18.3452	16.4196	19.1665
ENSRNOG00000061886		AABR07067855.1	0	0	0	0	0	0
ENSRNOG00000017170		Med4	10.4602	10.2332	10.3211	9.54126	8.41298	8.42562
ENSRNOG00000062142		AABR07029963.1	0.0388104	0.0138161	0.0144281	0.030337	0.0575714	0.0155722
ENSRNOG00000042179		Cfap20	25.3589	26.6778	23.683	23.3901	23.8322	25.6141
ENSRNOG00000003645		LOC103689931	4.83287	21.4661	7.93934	4.85211	4.45783	33.312
ENSRNOG00000062231		AABR07037451.2	10.2932	9.68761	10.1953	8.8444	8.07523	8.75214
ENSRNOG00000012199		Sox2	0	0	0	0	0	0
ENSRNOG00000060946		LOC100910506	10.0998	9.95696	9.79752	14.5799	10.3551	15.2391
ENSRNOG00000051282		AABR07038939.1	0	0	0	0	0	0
ENSRNOG00000056261		AABR07036417.1	0	0	0	0	0	0
ENSRNOG00000000895		Rabgef1	22.0308	20.7659	20.0855	20.3959	21.8367	22.7337
ENSRNOG00000056228		Atp10a	5.76768	5.2456	4.93964	4.38408	3.91618	4.53758
ENSRNOG00000003198		RGD1305733	0.0110669	0.0196984	0.0308564	0.0173013	0.109444	0.0555054
ENSRNOG00000051198		AABR07039169.1	0	0	0	0	0	0
ENSRNOG00000028902		Spink14	0	0	0	0	0	0
ENSRNOG00000021555		Mis18a	22.8169	20.9394	20.6615	21.7055	23.0448	21.0828
ENSRNOG00000023588		Dmgdh	0	0.00599114	0.00625652	0.00526208	0	0
ENSRNOG00000051079		AC095947.4	0.509097	1.95174	2.03819	1.71423	0.645464	1.29632
ENSRNOG00000002418		Tgfb2	6.04582	5.75924	4.4466	5.40847	4.79174	5.0313
ENSRNOG00000057899		AABR07032834.1	0	0	0	0	0	0
ENSRNOG00000031328		Zfp110	7.13368	7.04586	7.40493	7.08381	6.74655	7.84006
ENSRNOG00000018676		RGD1562987	257.979	278.579	242.728	218.401	236.699	214.536
ENSRNOG00000043377		Fdps	229.025	216.655	193.649	219.626	348.252	259.556
ENSRNOG00000013245		LOC286960	0	0	0	0	0.0201376	0
ENSRNOG00000012995		Gpr165	0.156645	0.383377	0.430689	0.336724	0.451825	0.314259
ENSRNOG00000001706		Kalrn	17.5073	15.226	17.6736	8.83401	8.32748	8.63232
ENSRNOG00000053650		AC142178.3	0	0	0	0	0	0
ENSRNOG00000059619		AC241722.2	0	0	0	0	0	0
ENSRNOG00000007160		Kat14	8.20658	7.39365	8.59669	8.64868	9.12866	8.27001
ENSRNOG00000042467		Ttc4	15.8316	15.0828	15.3437	16.163	14.8653	14.6181
ENSRNOG00000048070		AABR07051563.1	0	0	0	0	0	0
ENSRNOG00000036558		Mir20b	0	0	0	0	0	0
ENSRNOG00000038150		RGD1560394	53.0654	54.4067	34.0028	47.3216	55.5344	46.5484
ENSRNOG00000019127		Zfp606	9.51051	8.76238	9.8514	7.31401	7.40036	8.61535
ENSRNOG00000051845		RF00100	0	0	0.0740475	0	0	0.319677
ENSRNOG00000059792		RF00026	0	0	0	0	0	0
ENSRNOG00000003122		Hdac8	6.52941	6.73397	7.68138	6.90716	5.71236	7.25021
ENSRNOG00000037036		Tas2r145	0	0	0	0	0	0
ENSRNOG00000047487		AABR07052692.1	0	0	0	0	0	0
ENSRNOG00000059830		AC244836.1	0	0	0	0	0	0
ENSRNOG00000051102		AABR07004269.3	13.1421	12.8123	12.552	14.4217	14.3059	13.8573
ENSRNOG00000054629		RF00003	0	0	0	0	0	0.541791
ENSRNOG00000029814		Prtn3	0.857511	2.07961	1.0759	1.32383	2.22605	1.5913
ENSRNOG00000056307		RF00001	0	0	0	0	0	0
ENSRNOG00000054809		AABR07026032.1	0	0	0	0	0	0
ENSRNOG00000017539		Mmp9	0.0152119	0.00676907	0.0424135	0.0356721	0.0125363	0.00762946
ENSRNOG00000016043		Aqp4	0	0	0	0	0.00753775	0
ENSRNOG00000050766		Rd3	0.259608	0.323462	0.410173	1.35962	2.3748	2.39578
ENSRNOG00000008659		Arhgap21	9.6681	9.09107	10.8214	10.1947	9.32466	9.96481
ENSRNOG00000004109		Zfpm2	3.52394	3.85231	3.85176	3.55782	3.10784	3.55915
ENSRNOG00000054159		RF00026	0	0	0	0	0	0
ENSRNOG00000020182		Mvp	32.6183	31.1852	30.857	35.0442	31.1023	33.7524
ENSRNOG00000017488		Snx24	7.10571	7.82875	6.40093	6.99489	7.76609	7.04192
ENSRNOG00000055264		AABR07024291.1	0	0	0	0	0	0
ENSRNOG00000058014		RF00026	0	0	0	0.151912	0	0
ENSRNOG00000013256		Ric8a	27.2761	28.9508	26.4911	26.3041	26.2215	25.7104
ENSRNOG00000008838		Gkn1	0	0	0	0	0	0
ENSRNOG00000053772		Klra22	0	0	0	0	0	0
ENSRNOG00000012439		Bid	5.47008	5.57429	4.11365	3.87597	2.87338	3.64403
ENSRNOG00000015631		Ippk	10.5451	10.5489	11.1604	9.47895	10.3772	9.53255
ENSRNOG00000033933		Stfa3	0	0	0	0	0	0
ENSRNOG00000013872		P2ry14	0	0	0	0	0	0
ENSRNOG00000031180		AABR07062108.1	0	0	0	0	0	0
ENSRNOG00000052484		RF01383	0	0	0	0	0	0
ENSRNOG00000029078		Hmgn5b	20.6822	21.6366	27.7164	26.2439	27.5929	20.7461
ENSRNOG00000053151		AABR07036436.1	0	0	0	0	0	0
ENSRNOG00000060871		RF00026	0	0	0	0	0	0
ENSRNOG00000059918		RF00026	0	0	0	0	0	0
ENSRNOG00000042983		Nudt21	31.1248	29.3978	28.1781	29.8946	31.9715	30.5069
ENSRNOG00000006639		Scn9a	0.0763306	0.0727844	0.0506722	0.0362255	0.067398	0.120319
ENSRNOG00000004269		Myt1l	2.33875	2.32297	2.33999	1.75591	1.43245	1.63929
ENSRNOG00000016243		Casq2	0	0	0	0	0.00677623	0
ENSRNOG00000055529		AABR07071874.1	0	0	0	0	0	0
ENSRNOG00000028267		Olr744	0	0	0	0	0	0
ENSRNOG00000058350		RF00026	0	0	0	0	0	0
ENSRNOG00000059636		RF00410	0	0	0	0	0	0
ENSRNOG00000016037		Mafb	8.81867	11.0362	8.11506	26.8413	17.7831	22.1148
ENSRNOG00000001601		AABR07034008.1	0	0	0	0	0	0
ENSRNOG00000053963		AABR07009927.1	0	0	0	0	0	0
ENSRNOG00000056532		AC126292.3	0	0	0.0555356	0.186834	0	0
ENSRNOG00000012853		Tk2	4.75256	4.29936	5.23406	4.32049	3.86642	4.39182
ENSRNOG00000050956		Mir6330	0	0	0	0	0	0
ENSRNOG00000009176		Mkrn2	16.182	17.8448	14.8644	15.114	15.8803	14.7778
ENSRNOG00000048223		Olr211	0	0	0	0	0	0
ENSRNOG00000049272		AABR07048303.1	0	0	0	0	0	0
ENSRNOG00000057335		Clec1b	0	0	0	0	0	0
ENSRNOG00000020189		Tinf2	6.77239	7.51448	8.55967	6.27594	6.08858	6.07493
ENSRNOG00000006060		Matn2	3.26202	2.63243	2.84326	1.47769	1.63655	1.51342
ENSRNOG00000048248		LOC100910446	0.187847	0.685431	8.18797	0.249619	0.696629	0.866767
ENSRNOG00000029308		Lrmp	0.0129642	0.0115378	0.0120489	0.0101338	0	0
ENSRNOG00000049422		LOC100911825	0	0	0	0	0	0
ENSRNOG00000050668		Olr158	0	0	0	0	0	0
ENSRNOG00000007250		Six4	2.79003	2.48615	2.66102	2.92691	2.54616	2.48421
ENSRNOG00000057956		RF00560	0	0	0	0	0	0
ENSRNOG00000051702		AABR07013558.1	0	0	0	0	0	0
ENSRNOG00000004927		Supt7l	17.6706	19.0666	18.3485	17.4247	17.0924	16.7786
ENSRNOG00000060505		AABR07043001.2	0	0	0	0	0	0
ENSRNOG00000002089		Ccng2	20.1971	17.9674	16.8862	18.9516	18.1912	17.8538
ENSRNOG00000003208		Ercc6l	5.85653	4.82416	6.19968	6.31872	6.00815	6.38571
ENSRNOG00000061101		Ripply1	0	0	0	0	0	0
ENSRNOG00000015054		Rcbtb2	7.60223	6.52578	7.98117	5.37496	4.82915	6.23167
ENSRNOG00000050057		Abca3	47.8911	47.8982	51.6603	50.8526	46.1718	51.9666
ENSRNOG00000061761		AABR07000723.2	0	0	0	0	0	0
ENSRNOG00000058658		Mtch2	174.735	181.05	162.745	162.897	184.645	167.372
ENSRNOG00000052410		RF00560	0	0	0	0	0	0
ENSRNOG00000027264		Dagla	27.7536	26.1427	29.4288	31.4025	31.4606	34.7224
ENSRNOG00000012088		LOC100364265	0	0	0	0	0	0
ENSRNOG00000059704		AABR07072200.1	0	0	0	0	0	0
ENSRNOG00000023643		Mmp17	1.42217	1.04272	1.13	5.1206	6.7103	6.62282
ENSRNOG00000001797		Umps	96.758	94.3663	84.4011	99.9955	111.167	104.604
ENSRNOG00000059460		Ttc30b	3.74919	4.27353	3.19096	3.29775	2.45578	2.5099
ENSRNOG00000026672		MGC94199	3.45375	6.37685	0.469506	0.169235	2.20904	3.74365
ENSRNOG00000054326		RF00604	3.88471	2.6438	4.45994	4.46554	1.31824	5.9597
ENSRNOG00000019745		Actn3	0.13733	0.360226	0.214962	0.225993	0.154871	0.174006
ENSRNOG00000016987		Pstpip2	0.684202	0.705665	0.885496	0.77974	0.500622	0.647833
ENSRNOG00000031163		Nfkbiz	2.29983	3.12366	2.80028	3.07553	2.48306	3.36798
ENSRNOG00000016465		Trmu	4.76653	4.94132	4.21091	4.09435	4.82385	4.86008
ENSRNOG00000000345		AABR07064998.1	0	0	0	0	0	0
ENSRNOG00000024808		Stk39	11.286	11.1374	9.92509	11.3014	10.5454	11.2267
ENSRNOG00000022066		Fam117b	4.68666	5.38738	5.32147	5.32832	4.65824	5.56181
ENSRNOG00000059194		RF00004	0	0	0	0	0	0
ENSRNOG00000032417		Gabrp	0.0150577	0.120608	0.0139945	0.0353105	0	0.0604169
ENSRNOG00000015764		Olr79	0	0	0	0	0	0
ENSRNOG00000053547		AABR07054247.1	0	0	0	0	0	0
ENSRNOG00000008161		Pdzk1ip1	694.323	676.714	634.335	541.904	520.474	488.317
ENSRNOG00000061195		RF00265	0.310368	0.138109	0.43268	0.363908	0.383666	0.622655
ENSRNOG00000020216		Gmpr2	8.29816	7.76862	7.47196	7.09273	6.16894	7.11353
ENSRNOG00000015977		Zfp609	8.00191	8.0675	9.05603	9.06879	8.69528	9.41627
ENSRNOG00000021474		Siglec5	0	0	0	0	0	0
ENSRNOG00000054310		RF00324	1.50323	2.67566	1.86279	1.76254	1.4453	2.0105
ENSRNOG00000061564		AABR07031724.1	0	0.09932	0	0	0.0306567	0
ENSRNOG00000011305		Sox10	0	0	0	0	0	0
ENSRNOG00000056074		RF00560	0	0	0	0	0	0
ENSRNOG00000006445		Olr698	0	0	0	0	0	0
ENSRNOG00000031840		Andpro	0	0	0	0	0	0
ENSRNOG00000025704		Yod1	6.19891	6.80529	6.27496	5.78169	6.77891	5.6372
ENSRNOG00000032446		Recql4	1.73317	2.03521	2.08381	1.70691	1.97528	1.86271
ENSRNOG00000001872		Lrrc74b	0	0	0.0352994	0.0148444	0	0.0190493
ENSRNOG00000001602		Ltn1	19.8332	19.4212	22.335	20.9155	19.1179	19.952
ENSRNOG00000014645		Aldh7a1	90.359	91.5365	80.9892	66.3743	61.1741	64.1187
ENSRNOG00000049953		Olr1458	0	0	0	0	0	0
ENSRNOG00000057067		RF00015	0	0	0	0	0	0
ENSRNOG00000057131		AABR07008991.1	0	0	0	0	0	0
ENSRNOG00000008966		Slco5a1	0.313426	0.268212	0.347315	0.433455	0.32784	0.332534
ENSRNOG00000004542		Ttc8	16.1512	16.8801	14.912	18.0736	16.1125	17.4802
ENSRNOG00000000512		Slc26a8	8.61139	8.71018	9.11688	8.69798	7.92983	8.63051
ENSRNOG00000010137		Xpo4	2.55373	2.49721	3.07874	2.81471	2.81906	2.82366
ENSRNOG00000062300		AABR07037451.3	0	0	0	0	0	0
ENSRNOG00000019107		LOC301444	0	0	0	0	0	0
ENSRNOG00000055750		AABR07044717.1	1.87493	0	1.74254	1.59881	1.26421	1.53877
ENSRNOG00000014870		Slc13a5	0	0	0	0	0	0
ENSRNOG00000019338		Dll3	0.0761708	0.0903865	0.0589939	0.0496171	0.0104622	0
ENSRNOG00000000137		Ly86	0	0	0	0	0	0
ENSRNOG00000055597		Hdac7	9.09211	9.33226	9.2981	7.36953	6.72534	7.46143
ENSRNOG00000007029		Dnaja1	273.288	266.955	264.351	263.91	283.347	295.951
ENSRNOG00000045753		Hist2h2be	6.98613	7.04321	8.42042	12.4149	12.8641	13.1942
ENSRNOG00000041721		RF00001	0	0	0	0	0	0
ENSRNOG00000011589		Camk2d	9.43725	10.6168	9.67459	8.06023	8.09382	7.81903
ENSRNOG00000010935		Cpb2	5.81902	4.99795	5.44861	13.4528	13.7049	14.5561
ENSRNOG00000060473		RF00401	0	0	0	0	0	0
ENSRNOG00000045999		Tnfaip8l1	7.56169	8.28015	7.23448	7.44639	6.81206	6.24653
ENSRNOG00000003117		Psmd12	88.2504	91.3295	86.0457	89.2102	99.7573	98.0731
ENSRNOG00000038322		LOC500684	0.341026	0.345852	0.51596	0.223175	0.163397	0.175018
ENSRNOG00000001699		Setd4	12.582	12.7989	12.069	11.2414	12.3258	12.2772
ENSRNOG00000017047		Inip	13.0659	15.0804	13.8239	13.0629	12.9069	12.6675
ENSRNOG00000055494		AABR07014161.2	0	0	0	0	0	0
ENSRNOG00000054927		RF00100	0	0	0	0	0	0
ENSRNOG00000061362		RF00405	0	0	0	0	0	0
ENSRNOG00000006983		Nr2c1	14.679	16.1463	15.0429	15.3592	13.5973	15.1142
ENSRNOG00000004912		Itgav	6.49173	7.26291	7.20448	6.75555	6.29048	6.75004
ENSRNOG00000042317		Cd209f	0	0	0	0	0	0
ENSRNOG00000004420		Rad21	123.359	122.599	128.073	129.278	129.068	132.914
ENSRNOG00000007400		Srebf2	79.4485	78.3235	75.5502	85.7352	92.6643	92.0633
ENSRNOG00000062125		Aox3	0.0604144	0.0537671	0.0786082	0.0566691	0.229025	0.096962
ENSRNOG00000036502		AABR07065049.1	0	0	0	0	0	0
ENSRNOG00000058207		Olr1331	0	0	0	0	0	0.022214
ENSRNOG00000056587		AABR07051808.1	0	0	0	0	0	0
ENSRNOG00000053872		AC128859.5	0	0	0	0	0	0
ENSRNOG00000045926		Lrrc45	16.5191	15.8186	15.8043	15.7039	13.8138	13.9222
ENSRNOG00000055996		AABR07006032.1	0	0	0	0	0	0
ENSRNOG00000028747		AABR07073039.1	0	0	0	3.25938	3.16857	2.82465
ENSRNOG00000059947		Sdc1	12.7941	11.8088	11.834	14.6222	13.656	14.7992
ENSRNOG00000033837		Cdh9	0	0	0	0	0	0
ENSRNOG00000049544		Olr137	0	0	0	0	0	0
ENSRNOG00000046556		AC103335.1	0	0	0	0	0	0
ENSRNOG00000060918		RF00004	0	0	0	0	0	0
ENSRNOG00000053414		RF00560	0	0	0	0	0	0
ENSRNOG00000016610		Arhgap1	80.0505	80.1345	83.7014	97.6661	95.6737	96.5581
ENSRNOG00000031848		AABR07065651.1	0	0	0	0	0	0
ENSRNOG00000010359		Bik	0.848317	1.52931	0.747988	2.4994	1.1831	1.24368
ENSRNOG00000014316		Rapgef1	28.0395	26.3293	30.4743	28.2022	27.9698	29.4754
ENSRNOG00000010005		Adck2	9.99776	11.8198	9.80044	8.0526	8.66875	8.92212
ENSRNOG00000060027		LOC100909993	0	0	0	0	0	0
ENSRNOG00000049389		Olr818	0	0	0	0	0	0
ENSRNOG00000055803		AABR07047840.1	0	0	0	0	0	0
ENSRNOG00000025052		Stard5	42.3332	40.8162	37.9453	56.3095	58.6681	58.3079
ENSRNOG00000033655		AC118115.1	0	0	0	0	0	0
ENSRNOG00000013994		Enpp1	1.12143	1.31868	1.03753	1.21374	1.03709	1.04855
ENSRNOG00000047028		Mmp24	64.8468	65.5084	70.5442	76.2437	75.4681	77.248
ENSRNOG00000004278		Dlx3	0	0	0	0	0	0.00794929
ENSRNOG00000008138		Jhy	0.636662	0.414983	0.350025	0.350465	0.258645	0.24286
ENSRNOG00000057477		AABR07043167.2	0	0	0	0	0.228494	0
ENSRNOG00000001449		Pom121	43.2246	44.5591	51.1065	45.475	44.2806	44.9342
ENSRNOG00000049793		AABR07065631.3	0	0	0	0	0	0
ENSRNOG00000003313		Glra2	0.0131445	0	0	0.00513735	0	0
ENSRNOG00000012140		Cep89	15.347	16.045	19.6112	15.6137	13.7715	15.3791
ENSRNOG00000013876		Mipep	4.93212	5.29202	5.27669	5.79311	4.46464	4.79956
ENSRNOG00000054294		Rprd2	14.4582	14.1448	15.9793	14.1578	14.0321	14.5117
ENSRNOG00000058965		RF00560	0	0	0	0	0	0
ENSRNOG00000049607		Lrrc10	0	0	0	0	0	0
ENSRNOG00000003625		Ubxn4	73.4223	73.0191	72.3999	65.8005	69.275	68.8126
ENSRNOG00000061350		Olr307	0	0	0	0	0	0
ENSRNOG00000051946		RF00026	0	0	0	0	0	0
ENSRNOG00000019474		Rsph9	75.0405	71.0855	78.1622	61.0645	64.9171	63.0955
ENSRNOG00000018698		Wac	60.6107	62.2913	57.6995	59.5077	59.5591	60.8628
ENSRNOG00000043707		AABR07003186.1	0	0	0	0	0	0
ENSRNOG00000048328		AABR07017849.1	0	0	0	0	0	0
ENSRNOG00000017731		Agpat4	63.4666	59.9721	64.3172	73.8606	75.44	69.2926
ENSRNOG00000059459		AABR07047256.1	11.7585	10.3617	11.0898	6.70105	9.40391	9.47077
ENSRNOG00000032999		AABR07047606.1	0	0	0	0	0	0
ENSRNOG00000016770		Calm3	501.82	484.967	463.469	520.527	537.044	546.534
ENSRNOG00000062129		AC239817.3	0	0	0	0	0	0
ENSRNOG00000005763		Arl1	127.502	119.891	130.12	96.6139	102.35	100.844
ENSRNOG00000003453		Lypd1	8.56189	9.71805	8.74541	10.8552	10.618	11.2126
ENSRNOG00000019766		Exoc8	10.1965	9.62899	10.9316	9.17483	11.2671	10.45
ENSRNOG00000062304		AABR07031518.1	0.0620735	0.110487	0.201918	0.0970423	0	0.124531
ENSRNOG00000058193		Slc27a6	0	0	0	0	0	0
ENSRNOG00000003899		Krt14	0	0	0	0	0	0
ENSRNOG00000049280		Slpil3	0	0	0	0	0	0
ENSRNOG00000005841		Erp44	109.228	102.017	97.0636	81.0343	84.0121	83.0764
ENSRNOG00000051360		RGD1563270	0	0	0	0	0	0.0254688
ENSRNOG00000040427		Mir764	0	0	0	0	0	0
ENSRNOG00000037707		Armcx6	30.0115	29.0215	26.2995	32.3069	32.1154	32.5914
ENSRNOG00000060705		RF00419	0	0	0	0	0	0
ENSRNOG00000059476		AABR07049503.1	0	0	0	0	0	0
ENSRNOG00000006797		Zfp280c	2.41712	2.28801	3.13247	2.74515	2.3924	2.81327
ENSRNOG00000059719		RF00100	0.0695473	0	0	0	0	0
ENSRNOG00000024390		Osm	0	0.0066956	0	0	0	0
ENSRNOG00000017441		Tpm3	195.072	187.341	178.425	193.92	204.839	210.789
ENSRNOG00000020169		Gimap8	0	0.00540497	0.00564439	0	0.00500499	0.00609198
ENSRNOG00000039994		Upf3b	27.0591	26.3274	30.2592	24.7151	23.533	25.0656
ENSRNOG00000015646		Olr834	0	0	0	0	0	0
ENSRNOG00000060383		AABR07043167.3	0.904115	0.965564	0.336111	1.41344	0.894108	0.362764
ENSRNOG00000055302		AABR07051326.1	0.0613637	0.129703	0.149706	0.0539621	0.0758557	0.0384709
ENSRNOG00000006383		Atoh1	0	0	0	0	0	0
ENSRNOG00000058343		AABR07030593.1	0	0	0	0	0	0
ENSRNOG00000014367		Ephb6	5.85584	5.48918	4.82922	4.80921	4.73314	4.91976
ENSRNOG00000054247		AABR07064230.1	0	0	0	0	0	0
ENSRNOG00000055918		AABR07058934.2	0	0	0	0	0	0
ENSRNOG00000010972		Neurog2	0.708908	0.303771	0.024402	0.513086	0.497668	0.368719
ENSRNOG00000052735		AABR07044837.1	0	0	0	0	0	0.024031
ENSRNOG00000023163		AABR07037058.1	0	0.100036	0.208934	0.0878626	0	0.0563755
ENSRNOG00000042977		Mtx1	42.4369	42.1126	35.8605	38.288	38.2003	37.3265
ENSRNOG00000024788		RGD1562036	0	0	0	0	0	0
ENSRNOG00000032828		Mapk8ip2	43.9748	44.4831	45.7257	44.6954	43.9249	45.7261
ENSRNOG00000026132		Trdmt1	3.52242	3.37318	3.11098	2.93049	2.95379	2.82045
ENSRNOG00000059032		AABR07000325.1	0	0	0	0	0	0
ENSRNOG00000057964		AABR07029830.1	0	0	0	0	0	0
ENSRNOG00000053080		RF00003	0	0	0	0	0	0
ENSRNOG00000058300		LOC108350020	0	0	0	0	0	0
ENSRNOG00000030569		Olr1163	0	0.0788355	0	0	0	0
ENSRNOG00000020332		Tnnt3	0	0	0	0	0	0
ENSRNOG00000042163		Btbd19	3.31321	3.83022	3.23165	3.01169	2.81489	3.39883
ENSRNOG00000051971		RF00026	0	0	0	0	0	0
ENSRNOG00000051476		AABR07055146.1	0	0	0	0	0	0
ENSRNOG00000028501		Zc3h18	16.5312	15.3132	18.0866	16.8802	16.1768	17.1558
ENSRNOG00000018387		Wdr7	8.69856	8.38922	9.17162	9.51735	7.89466	8.57472
ENSRNOG00000055165		RF00560	0	0	0	0	0	0
ENSRNOG00000020066		Pcdhb11	2.19693	2.13078	2.73353	2.36214	1.98787	2.36563
ENSRNOG00000049650		AABR07018556.1	0	0	0	0.0107718	0	0
ENSRNOG00000018774		LOC100911847	1094.64	1067.01	1077.57	906.62	1075.88	1060.06
ENSRNOG00000061199		Tcfl5	0	0	0	0	0	0
ENSRNOG00000055796		AC103574.1	0	0	0	0	0	0
ENSRNOG00000052737		AABR07017669.2	0	0	0	0	0	0
ENSRNOG00000059185		RF00004	0	0	0	0	0	0
ENSRNOG00000056224		RF00066	0	0	0	0	0	0
ENSRNOG00000013778		Bpifa3	0	0	0	0	0	0
ENSRNOG00000031171		Wdr46	17.7646	15.958	19.1118	18.3992	18.3552	17.1894
ENSRNOG00000001303		Specc1l	17.552	17.4116	17.8082	15.9669	16.2964	16.4354
ENSRNOG00000015445		Mal	0.0366103	0	0	0.0143086	0.0678845	0
ENSRNOG00000052224		Celf6	6.26271	5.44376	5.56058	5.87446	5.99297	6.70902
ENSRNOG00000046333		AABR07007032.1	5.71199	7.52559	6.48839	7.74792	7.06097	8.85662
ENSRNOG00000054696		AC127118.1	0	0	0.0170577	0	0	0.0184104
ENSRNOG00000046790		AABR07040887.1	0.640444	0.546473	0.806928	0.799955	0.916843	0.960326
ENSRNOG00000056105		AABR07035868.1	0	0	0	0	0	0
ENSRNOG00000052337		RF00100	0	0	0	0.0503238	0	0
ENSRNOG00000049123		AABR07066510.1	2.6724	0	0.058212	0.0326397	0.0344118	0.125656
ENSRNOG00000005157		Rbbp7	347.98	348.978	346.417	350.928	374.59	364.956
ENSRNOG00000032428		Olr1006	0	0	0	0	0	0
ENSRNOG00000004249		Tlr7	0	0	0.00902681	0	0	0
ENSRNOG00000017847		Rps19bp1	66.5121	66.5189	62.3401	60.629	62.3358	61.5223
ENSRNOG00000015201		Tmem266	0.476147	0.662602	0.83678	0.778217	0.634971	0.937871
ENSRNOG00000057286		AABR07064835.1	0	0	0	0	0	0
ENSRNOG00000007408		Ebf4	5.33766	6.41079	5.81055	4.97392	4.30718	5.23023
ENSRNOG00000012375		Inpp1	9.64974	7.87013	7.46909	7.81204	7.81464	6.61092
ENSRNOG00000058098		RF00026	0	0	0	0	0	0
ENSRNOG00000029762		Acr	0.7032	0.740776	0.813603	0.426276	0.248363	0.331094
ENSRNOG00000057728		AC128476.1	0	0	0	0	0	0
ENSRNOG00000036338		Mir702	0	0	0	0	0	0
ENSRNOG00000023148		Col11a1	0	0	0	0	0.00223343	0.00271849
ENSRNOG00000026425		Ppp6r2	27.0212	27.3841	28.8631	26.6108	24.1265	25.9984
ENSRNOG00000058080		RF00002	0.27006	0.360519	0.125496	0.211098	0.556399	0.948134
ENSRNOG00000021953		Meioc	0.0092032	0.00409529	0.00855339	0.0215816	0	0.00923166
ENSRNOG00000051422		RF00560	0	0	0	0	0	0
ENSRNOG00000056426		RF00265	0	0.276218	0.288454	0	0.127889	0
ENSRNOG00000046621		AABR07043748.1	1.45279	2.06781	0.569254	1.97049	1.52265	1.91427
ENSRNOG00000017981		Mcm10	7.99128	7.64045	8.7032	8.92825	8.47509	8.43375
ENSRNOG00000043550		AC139392.1	1.17389	0.895482	1.24686	0	0.138202	0
[truncated: 30,884 more rows]

## Sheet: Diff. Reg.
gene_name	beta3KO_01	beta3KO_02	beta3KO_03	WT1	WT2	WT3
Nos1	19.7959	14.6349	23.6304	0.789483	0.653546	0.795484
LOC103694867	8.54594	8.72606	0.0825914	0.254701	0.146471	0.282279
Ccdc63	0.300827	0.211951	0.104845	0.00979782	0	0.0251464
Stac	1.13014	0.955506	0.735243	0.0147233	0.155227	0
Rcor2l1	5.46877	5.08156	0.3167	0.220886	0.164384	0.275118
LOC108349745	0.288147	0.0997278	2.00852	0.0750789	0.0395775	0.0321154
Ebf2	0.0688184	0.0442335	0.0426396	0	0.00630155	0.00383507
LOC102551901	1.29316	3.09546	0.0828866	0.081331	0.0734971	0.164009
Ccnj	0.774955	0.442108	0.0415522	0.0155323	0.0368451	0.0498302
Tdrd9	0.235222	0.195979	0.153495	0.0078241	0.0247467	0.0150606
LOC103689986	30.6162	1.36164	20.1979	0.835876	1.50492	1.96378
Mmp13	0.287704	0.149362	0.230253	0.0437287	0.0131722	0.0080165
Anxa8	1.39062	1.11289	0.791491	0.143249	0.0799552	0.108133
Kcnt2	0.150686	0.125724	0.183811	0.00736167	0.0155227	0.0330644
Mpz	0.401613	0.605636	0.393993	0.113363	0.0551623	0.0223808
Pla2g5	0.758203	0.763274	1.10899	0.194317	0.0819466	0.0997439
Plaur	0.527247	0.581852	0.705629	0.0164854	0.191184	0.0634653
AABR07025263.1	0.183675	0.379474	0.420669	0.0871697	0.0486542	0.0263204
LOC108348201	0.140921	0.172446	0.196456	0.0206538	0.0217752	0.044174
Rpph1	36.0766	10.1228	10.182	1.69091	5.57818	2.44988
Vstm4	0.267455	0.26353	0.310714	0.029866	0.0787188	0.038326
Smarcb1	4.65535	1.90914	2.67741	0.425788	0.601626	0.664692
Scn10a	0.153419	0.199118	0.115851	0.0174888	0.0526808	0.0192367
Ngb	0.714672	0.861728	0.385671	0.180206	0.018999	0.185002
Spn	0.93592	1.04357	1.00981	0.235452	0.217206	0.161865
Kdr	1.95966	1.87881	2.21453	0.42821	0.267939	0.567378
Eln	0.200214	0.184329	0.153995	0.0539661	0.0113792	0.048477
Artn	0.484323	0.500555	0.377525	0.134335	0.077252	0.109701
Vill	1.71795	2.00754	1.82573	0.44957	0.560156	0.33716
Acot12	0.162388	0.104376	0.289267	0.0423113	0.029739	0.0678707
Ly49i4	3.44209	0.9977	3.72734	0.58008	0.546513	1.01365
Gsta4	3.34104	2.75934	3.42808	0.480534	0.903111	1.12606
Izumo1	0.2675	0.388426	0.484141	0.088041	0.127629	0.084735
Emc9	0.686729	0.573641	0.565459	0.127136	0.163825	0.193362
Ckmt2	2.52056	2.31702	2.28095	0.972164	0.587635	0.515652
Unc93a	0.530862	0.674932	0.690732	0.17784	0.0874978	0.304288
Slc7a7	1.70659	1.53962	1.52091	0.529941	0.443117	0.480729
Kyat3	0.578898	0.705015	0.891987	0.202438	0.213429	0.275063
Edn1	2.27395	1.05182	1.04279	0.666555	0.406851	0.42018
Iqsec1	1.64406	1.37205	1.70148	0.626081	0.451629	0.537633
AABR07000398.1	1.89705	0.616888	1.76311	0.256651	0.661431	0.54892
Cilp2	2.57831	1.73684	2.83195	0.736853	0.848245	0.894466
Ttbk1	2.42403	2.39241	2.61392	0.652855	0.854773	1.07159
Rab15	2.13796	3.00965	2.35566	0.966971	0.886496	0.768807
Kcnh7	0.587556	0.425874	0.377183	0.142044	0.154748	0.206584
Ccdc125	2.03119	1.57262	2.36183	0.598066	0.570485	0.995893
Ackr3	8.41023	8.2974	7.9961	3.19046	2.92109	2.9306
Gpr135	1.07454	1.13141	0.829882	0.508695	0.299338	0.303624
Tmem100	46.2368	43.8803	41.6985	17.8032	16.4251	14.8523
Rab34	26.2336	27.4684	26.1069	11.2006	9.5226	10.3418
Lhfpl5	2.01636	2.6575	2.54633	0.974553	0.925986	0.910938
Grin1	9.67837	10.0462	10.0916	4.69751	3.42112	3.7089
Pcdh7	0.947311	1.09498	0.955583	0.41991	0.299899	0.480914
Ccdc114	0.922958	1.04283	1.2382	0.570886	0.343932	0.378375
Vash2	2.54335	2.49478	2.84166	0.907594	1.09356	1.20905
Stap2	0.758603	1.0458	0.815635	0.395319	0.330974	0.343173
Pcnx2	0.176143	0.229337	0.233433	0.0739424	0.118279	0.0687118
Pcdhb14	18.8663	18.6612	17.8571	8.56862	7.54489	7.39734
Ppp1r35	1.59278	3.87852	1.89152	0.778145	0.856854	1.50894
Mef2c	1.20067	1.09698	1.22274	0.544149	0.421058	0.544536
AABR07044959.1	2.42231	1.7578	1.90493	0.815642	0.829213	0.971922
Slc7a11	0.308623	0.401594	0.482399	0.171793	0.200389	0.147753
Tmem255b	9.70079	8.0248	5.29652	3.06877	2.94315	4.03967
Pmp22	5.15286	5.52346	5.73619	2.64047	2.5196	2.01009
Srsf12	0.4803	0.616654	0.409799	0.172332	0.181688	0.308027
Pear1	0.402477	0.510528	0.408456	0.15911	0.148687	0.273788
Gpr75	2.0954	1.84357	1.77714	0.921715	0.807609	0.831161
AABR07005985.2	0.726694	0.776085	0.97671	0.410734	0.350112	0.358864
Fau	6.62118	4.69571	6.05753	2.99214	2.38725	2.5944
Mapk12	6.10825	5.79125	6.67463	2.76231	2.76354	3.00163
Zfp483	2.48365	3.02561	2.82611	1.43944	1.25298	1.15567
Fsd1	1.82417	2.16592	1.85547	0.973617	0.738918	0.992439
AC134224.2	9.88405	11.6678	16.4642	4.51643	6.93701	6.23709
Col24a1	0.732602	0.560807	0.771342	0.296339	0.354648	0.313475
Foxn4	0.944513	1.12762	1.09193	0.480194	0.556892	0.462163
Map6d1	1.92167	1.83537	1.82955	0.781587	0.811146	1.11269
Clec2d	4.15308	4.42493	4.81121	1.94323	2.28976	2.31766
Npr2	0.675657	0.855718	0.874301	0.406263	0.454019	0.318019
Ptk7	3.08761	3.66648	3.73793	1.97531	1.66458	1.55304
Rbpjl	2.04577	1.98489	1.55088	1.13506	0.641318	1.00593
RT1-M3-1	55.4877	54.2452	48.0202	27.865	23.6728	27.8031
Sdf2l1	129.752	120.832	93.8711	50.5664	62.7178	61.2829
Tmem178a	7.63095	7.53603	7.24305	3.54379	4.44638	3.38253
Casr	7.25799	8.06983	9.19425	4.21228	4.30578	4.0192
Kalrn	17.5073	15.226	17.6736	8.83401	8.32748	8.63232
Arhgef6	1.50772	2.02603	1.58163	0.89266	0.750439	0.980805
Fam135b	1.82681	1.75537	2.14301	1.16733	0.96754	0.829082
Disp3	1.34324	1.51941	1.18169	0.849598	0.659118	0.611986
Rcn3	4.35396	4.97503	4.99116	2.68405	2.69394	2.13549
Slc26a1	1.04225	1.21183	1.33321	0.613215	0.614182	0.657638
Arhgap36	20.5161	20.875	20.0022	11.816	10.1496	10.3208
Lypd6b	2.0294	1.55946	1.84457	0.845573	0.876746	1.14787
Matn2	3.26202	2.63243	2.84326	1.47769	1.63655	1.51342
Arhgef18	7.58728	7.71537	7.77973	4.13059	4.11167	3.98399
Mafa	279.809	276.39	276.638	155.766	140.41	145.206
Antxr2	6.81815	5.67688	7.70684	3.16892	3.60965	3.9386
Bmf	5.41818	3.90735	4.9707	2.26971	2.77943	2.58235
LOC100912163	1.04337	1.29568	1.35758	0.694186	0.46792	0.837278
Sncaip	3.33345	3.58614	2.75947	1.73427	1.69847	1.81098
Dnm3	1.38009	1.38316	1.06887	0.714327	0.568674	0.79819
Tnfrsf9	19.565	17.6201	14.191	8.45579	10.9929	8.5403
Slc16a2	1.93171	1.83302	2.36007	1.01997	1.20186	1.13566
Creld2	110.171	102.462	89.705	54.517	59.5967	52.2095
Trpm5	1.90513	1.81814	2.40536	1.22694	1.08125	1.11176
Ins1	61501.1	58374.2	46162.4	31845.2	31036.2	29939.9
Zfp703	6.66362	6.37464	7.46428	3.9015	3.84623	3.71924
Slc17a9	17.3959	17.2138	17.8149	10.9197	8.6363	10.0079
Slc25a27	2.24663	2.39743	2.36508	1.49812	1.05297	1.41516
Camk4	43.7192	44.3008	44.2249	22.3346	26.7978	25.8442
Spint1	25.7661	24.3547	21.7506	14.1801	13.6692	13.128
Kcnk10	1.35366	1.31974	1.6943	0.808209	0.8633	0.825624
Prdm8	8.01806	6.77771	7.25558	4.04988	4.29463	4.26867
Akap12	12.6516	13.3559	13.7914	7.63014	7.74206	7.40467
Nptx1	4.46983	4.16615	4.60854	2.53354	2.70375	2.38098
Zkscan4	4.42849	3.84776	4.27849	2.46281	2.43785	2.35278
Dhrs7	53.9598	54.2154	56.9013	31.1494	33.0396	31.2965
Ace	1.77467	1.89812	2.02657	1.04507	1.1346	1.12557
Cnrip1	46.5549	46.038	43.2855	28.1667	25.8389	24.9429
Tmc4	7.20356	7.63806	6.58161	4.20112	4.02725	4.31856
Cyp4a8	40.1867	41.3858	40.7291	24.5722	22.1896	24.869
Pon2	13.6854	12.6436	12.3116	5.9739	8.5246	8.27226
Fam163b	32.3911	33.3322	33.8282	19.9208	18.5381	20.2195
AABR07056118.1	2.38163	2.34368	2.68151	1.23837	1.5304	1.6102
Gpat3	2.54475	2.3194	2.66309	1.57853	1.16946	1.71087
Hyou1	156.772	139.949	164.472	94.1558	90.2019	90.0905
Slc16a7	5.57711	5.30027	5.07225	2.67796	3.64409	3.17679
Kcnq1	5.68093	5.73178	5.39276	3.39577	3.14201	3.48919
Zcchc9	36.8532	35.8041	36.8729	21.9391	21.392	22.2348
Npr1	3.26641	3.18452	2.86475	1.81805	1.85357	1.90745
Kif5a	1.77267	1.70746	2.11177	1.20596	0.870697	1.30812
Nat1	3.08448	2.96795	2.43299	1.4324	1.74466	2.0094
Bend5	4.78481	4.40971	3.99384	2.89817	2.4575	2.70689
Ngfr	1.84046	1.71189	2.06687	1.23882	1.01643	1.1859
Tmlhe	16.0986	15.4897	16.6259	10.1061	9.71141	9.83329
Fkbp1b	7.30974	6.7041	6.10216	4.41985	3.47953	4.49643
Steap2	3.56838	3.8407	3.22755	2.27069	1.89153	2.39827
Pde8b	3.13635	3.00206	2.97563	2.06853	1.50774	2.06459
Slc7a2	33.9171	35.6136	34.3065	23.416	19.4206	21.51
Pcsk1	8.1184	6.3816	8.03926	5.09929	4.57464	4.31564
Runx1	6.27887	4.92602	6.80135	3.41167	3.94847	3.86236
Dnajc3	87.5615	79.972	86.6009	54.3781	52.4773	52.6412
Porcn	9.31955	9.2646	8.41405	6.036	5.75764	5.20202
Fmnl2	5.03733	4.26561	5.427	3.10497	3.11865	3.06065
Shisal1	30.5908	30.7323	29.9483	20.7937	17.7535	19.5318
Rgl3	10.6617	10.008	9.75641	7.28391	5.72572	6.3717
Npnt	10.3625	9.3049	9.23229	5.97088	5.6837	6.82508
Itpkb	15.2868	16.9072	16.7473	12.0814	8.58596	10.6363
Slc6a15	2.14811	2.65084	2.31546	1.55362	1.30034	1.69937
Anxa6	12.255	11.957	12.0891	8.78057	7.15514	7.31851
Kif7	3.18169	3.2821	3.50429	2.32554	1.80054	2.26412
Parp3	4.73148	5.2636	5.28427	3.11572	3.54701	3.27043
Acad8	16.3026	15.2874	14.1039	9.98157	9.08154	10.6657
Spock1	38.7863	39.2744	35.8167	28.343	22.5763	23.2274
Oat	47.8625	44.3367	44.753	29.3006	31.6254	28.6276
Wnt4	157.277	143.816	154.138	95.5518	102.225	102.817
LOC100911295	26.9573	21.8758	26.5431	15.36	16.0923	18.6335
Serpinb6a	21.6104	21.3011	20.6139	14.137	14.6762	13.6486
Pawr	14.4311	13.9129	13.9707	9.87133	9.44122	9.0313
AC134224.1	23.6616	26.8937	32.0489	17.9976	17.2538	20.2199
Vopp1	9.41277	11.3428	9.566	6.28646	6.20573	7.88632
Amigo2	45.1759	46.5236	45.8066	32.4304	30.001	30.7427
Nceh1	22.5537	21.8343	21.2851	15.0722	15.0221	14.4231
Clic2	19.0831	20.3288	19.2818	12.1659	13.1296	14.8259
Smim14	125.701	118.729	104.828	74.8301	85.2762	79.77
LOC103694903	65	55.6393	50.5811	36.4068	36.9092	45.5308
Hspa5	886.507	793.806	903.822	602.714	606.808	607.889
Znrf2	39.6085	36.6319	41.0493	27.2927	27.3617	28.4887
Dagla	27.7536	26.1427	29.4288	31.4025	31.4606	34.7224
Ampd2	86.843	81.7516	81.8575	97.4952	97.162	99.737
Camk2n1	358.39	325.337	370.131	385.5	428.301	427.736
Cd99	135.507	124.225	123.396	138.362	159.211	154.965
Kdm2b	24.3914	23.4927	25.1696	27.9038	28.9697	29.5014
Rrm2	54.1228	50.3292	51.8171	59.9604	63.4934	62.3634
LOC294154	72.7844	75.0911	71.1853	86.7747	85.6024	88.4247
Gsr	60.2955	55.7594	58.7651	66.9512	71.906	69.4784
Mast3	30.8969	30.1013	33.1375	37.5478	34.7877	39.8882
Foxp4	38.1445	39.9472	37.8116	46.457	43.7762	48.106
Kcnk3	12.6989	12.2528	12.2762	13.8958	15.1971	15.3447
Pmf1	67.7554	68.6544	62.6996	73.0625	81.9599	82.9823
Suox	42.168	39.1409	38.1062	48.5635	46.6891	47.5702
Barhl1	43.3548	39.8771	38.5881	48.0975	47.0678	50.6076
Klhdc8a	47.3161	48.624	44.3921	53.2148	58.0325	56.9105
Rnf187	246.039	238.697	235.412	287.468	286.473	289.499
Raly	310.357	308.581	326.177	361.976	384.546	389.49
Sdsl	28.8529	28.1629	27.545	32.2614	31.6625	37.7368
AABR07035338.1	58.3621	58.258	59.5639	67.1769	68.8232	75.8135
Anln	27.9715	25.8119	28.7616	33.0205	32.0141	34.2412
Tmem8a	25.2584	27.1894	25.4144	31.5494	29.7431	32.4715
Eif4e3	14.5943	14.8083	12.9253	16.0281	16.8915	18.0606
Dpysl2	77.1724	76.5505	82.0277	96.5095	93.6643	93.8352
Itpk1	52.2744	53.0145	48.8044	60.2065	59.6601	65.7772
Hsph1	34.5109	34.5536	34.4241	42.4053	39.456	42.8438
Actn1	20.6676	21.2258	22.0423	25.926	24.1874	26.9461
Sorcs2	74.9152	71.6454	80.1255	89.5432	90.515	93.2608
Tmod3	40.4996	38.3871	38.2188	46.6546	47.755	46.8448
Gc	606.601	576.283	572.029	726.258	705.618	685.882
Dstn	189.137	189.216	202.767	230.312	243.05	228.36
Sumf2	35.6045	32.2415	36.4441	41.1179	42.5023	42.3575
Slc45a4	11.4176	11.4245	11.8911	13.379	13.6398	14.9589
Agfg2	30.6265	30.3087	27.1926	31.8248	37.6489	37.0429
Mylip	14.9337	15.1358	15.9133	16.9325	19.7615	18.9083
Neurod2	24.7428	24.8438	22.9205	28.4908	28.1197	31.0677
Mtss1	22.2823	23.1455	21.7003	27.9517	25.5253	27.7333
Pola1	25.9169	24.6251	26.6819	32.3498	30.0585	31.0261
Ing1	20.9973	20.8312	20.1321	22.7406	24.5133	27.7253
Adam15	70.9617	69.4127	68.1323	83.9481	83.1981	85.174
Pbld1	75.0433	74.3278	78.0016	86.2126	95.5094	93.4382
Acsl5	47.0232	44.4144	46.6418	54.1311	58.09	55.0173
Kpna2	125.364	121.45	115.206	141.978	150.985	145.585
Dusp3	27.1184	25.495	26.7036	33.4311	30.6613	32.0045
C2cd4b	66.0225	65.723	61.4175	74.2181	79.906	79.9491
Dcbld1	28.3438	26.3124	27.3759	30.1917	34.9528	34.4207
Slc25a44	30.6874	29.6035	28.8415	34.3152	36.8677	37.0692
Tmem252	31.8077	29.2792	31.2833	37.103	37.2692	37.8614
Tyms	32.7879	32.8429	30.9652	38.0831	40.5313	38.775
Traf4	48.7699	47.3009	44.9792	54.5631	58.0984	58.9338
Ifi30	18.9342	16.5578	17.9339	21.5183	21.5333	21.949
Fam102a	54.0209	51.871	59.7721	65.4867	68.9425	67.1747
Tmem184a	344.901	323.169	328.081	372.877	429.429	410.034
AABR07035839.1	279.154	299.289	311.39	354.161	352.507	377.216
Fam110a	15.2502	15.0619	15.9667	18.4534	19.0433	18.9235
Elovl2	24.7425	23.626	22.7363	28.7394	28.6324	29.3879
Dolpp1	17.7088	18.4394	18.0856	21.8172	22.2855	22.0718
Plxna1	20.0087	18.4419	22.5075	24.5194	25.0405	24.8218
Lpin1	11.2528	10.5833	10.4781	12.442	13.3574	13.6591
Lima1	7.4983	6.69877	6.61376	8.89261	7.83645	8.71438
Gdpd1	32.3189	33.4026	29.5452	38.9742	38.3121	39.2211
Lcp1	35.1217	33.2392	36.5886	40.7776	43.8213	43.8032
Orai2	14.5958	14.4932	16.4665	17.8569	18.9363	18.9762
Dennd4c	17.7324	16.9926	19.3705	22.0191	21.8648	22.3432
Mapk3	160.472	157.987	151.877	191.076	193.021	192.251
Anks4b	43.7578	43.5343	44.2534	55.1871	54.6185	51.5291
Slco3a1	98.4353	89.8486	91.5959	106.214	121.788	115.34
Diras1	20.992	18.4871	19.6218	23.4865	23.2981	25.7191
Fsd1l	28.3289	26.6722	32.1899	35.9817	35.0652	36.0189
Eif4ebp2	45.8457	46.1555	47.3491	55.7618	57.4567	57.9256
Fblim1	21.9332	20.5415	21.0142	26.4266	25.2869	26.2672
Ppp2r5a	14.3864	15.3271	14.6288	17.8888	18.0811	18.4966
Slc25a25	23.4147	22.5976	22.2361	28.439	27.5068	27.9117
Tkt	127.161	123.63	113.213	141.204	159.275	146.816
Asic1	47.3274	50.1892	47.1244	58.2185	60.6217	59.0146
Fads6	14.3918	12.8083	15.1189	16.7614	17.8432	17.5141
LOC100912195	326.555	325.08	288.206	380.55	409.139	369.077
Espl1	8.78942	8.09581	8.2678	11.1344	8.75533	11.139
Cited1	53.5102	54.4571	49.311	61.5582	67.3266	65.1997
Myrf	49.353	50.2466	57.3677	68.6654	61.0626	63.9948
Aacs	102.813	108.482	105.444	112.712	147.843	130.396
Zbtb7b	18.8753	18.6215	18.5025	23.0296	23.5989	22.4993
Hdac5	54.828	53.5941	54.0889	69.5215	64.9759	66.1209
Slc50a1	27.4365	26.4065	22.7109	31.5549	31.7505	31.3403
Slc22a23	5.0823	5.36545	5.71053	6.90032	6.47177	6.60831
Fgd6	6.78594	6.48503	7.32177	8.1685	8.3544	8.96005
Vgll4	53.3399	48.9568	51.6676	58.6584	65.3293	66.6088
Hnf1a	12.237	12.7684	12.6348	15.5149	15.3304	15.7945
Trim14	11.7854	12.2627	12.3134	14.5505	15.946	14.5765
Nfam1	8.84762	8.27515	8.6134	10.7475	10.483	10.683
AABR07051395.1	108.055	108.915	102.215	120.826	141.032	133.961
Dgkz	36.8561	37.4006	38.5798	45.4419	45.747	48.7396
Jade3	12.2316	12.1886	12.8597	15.9857	15.8362	14.4102
Stard10	96.4758	88.6864	77.9191	108.585	107.991	109.734
F11r	32.7697	30.8444	29.7085	36.7522	38.8195	40.2186
Baiap2	20.086	20.4204	20.0191	23.742	24.4269	26.9377
Epb41l3	15.8267	16.8892	17.0443	20.6767	19.6724	21.4418
Atp2b1	54.3076	56.6305	60.8693	74.6322	67.1209	71.6494
Tmcc3	5.33697	5.3058	5.41671	6.78517	6.52467	6.6452
Stk32c	24.7815	26.7772	23.8226	33.5031	28.8533	31.3124
Smpd3	12.6934	12.9521	14.1327	16.7747	16.2003	16.4558
Slc35d3	18.8491	19.3866	18.8892	22.9484	24.1023	23.9382
Sapcd2	20.4592	20.011	19.5508	22.0433	26.8665	25.6901
Gabbr2	23.8369	23.8102	23.7423	29.4898	29.6166	29.6254
Josd1	44.0723	42.9244	45.3831	52.8259	56.8786	54.8887
Actr5	16.3972	15.5217	15.5759	18.843	20.296	19.9191
Klhl8	42.7921	41.1147	40.693	52.748	50.7731	51.5064
RGD1304694	30.4958	31.6013	31.1353	37.7839	36.9907	41.2307
Trpm3	3.21112	2.85217	3.07278	3.80347	3.78531	3.78068
Pip5k1b	28.8606	29.8274	28.6059	36.9167	34.2948	37.434
Jph3	3.20051	3.18195	3.33362	3.75487	4.14407	4.19377
Pim1	8.96459	7.89274	7.88529	9.81031	10.7519	10.2448
AABR07028769.1	12.9655	13.6803	13.0595	16.2723	16.3104	16.8945
Cadps	26.5498	27.1613	26.2787	32.4997	32.5987	34.6136
Zcchc2	9.61485	10.6795	9.51561	12.1875	12.1211	12.8536
Vcl	13.0927	14.8177	16.2273	18.6077	17.9119	18.5175
Rhpn2	8.57248	7.79777	8.01575	10.2733	10.1639	10.0005
Ptprm	2.69229	2.28634	2.28783	3.06502	2.8316	3.17531
Zfp36	8.36605	8.12985	9.89784	10.5852	10.6965	11.6727
Casp3	27.2528	24.0511	26.5699	32.4629	32.2679	32.5094
Tspan2	7.98458	9.70016	8.59624	11.0019	10.2482	11.5756
Snx13	13.4243	13.1884	12.9368	15.8929	16.2939	17.2245
Lonp2	31.5892	30.7492	30.5523	38.4878	38.8974	38.6989
Samd5	7.89194	7.26887	8.04102	9.28926	9.58713	10.1447
Bcl2l11	5.2391	5.00687	6.4247	6.0082	7.19792	7.64663
Plod1	7.03027	5.94296	6.3766	8.48281	7.30461	8.41714
Pfkfb3	27.0238	23.284	30.5166	28.9929	36.0588	36.1069
Tmem131l	26.1241	25.4182	28.474	30.6864	35.568	33.9236
Rem2	40.1762	33.4142	33.4528	46.1953	42.5776	45.2789
Als2	3.39714	3.41601	3.7655	4.41138	4.18731	4.65048
Msi1	31.0411	30.7463	36.6627	45.0399	38.816	39.4691
Rpa1	25.7972	25.8227	26.3466	32.1498	31.9937	33.5262
Clcn5	8.86968	8.47643	9.88051	11.3685	10.9965	11.7507
Gad1	23.8153	23.1627	23.4941	27.3303	28.8462	32.1435
Ano6	10.8348	11.5738	12.8215	15.5552	13.5891	15.0182
Rspo4	201.257	176.311	180.127	211.286	248.026	239.863
Sigmar1	55.4814	54.1031	46.4666	58.9034	68.7943	68.0535
Ascl1	11.0105	10.817	10.3484	12.4952	13.4689	14.4036
Comt	77.8909	78.2912	72.2495	88.3271	104.938	93.3552
Rgl1	6.23792	6.44168	6.64331	7.94759	7.87126	8.43487
Gadd45a	29.776	30.8245	30.0252	31.5399	43.181	39.0454
LOC100910996	182.581	180.326	175.265	221.199	232.637	221.854
Mageh1	28.3034	29.1305	31.2874	37.949	35.7697	37.7265
Slc20a2	23.752	22.6995	21.9795	25.6325	29.4382	30.9094
Gstm2	129.374	132.041	119.073	153.047	167.397	157.651
Ncam2	6.36396	6.83979	7.68657	8.02194	9.31351	8.91599
Lmna	125.124	117.171	124.822	155.075	152.442	154.033
Cdc42se2	52.7815	52.0939	52.0428	64.7564	65.7518	66.7815
Stard4	25.2534	24.2722	26.2354	26.8744	36.6107	31.7676
Dhcr7	53.9274	50.0913	46.4895	53.0792	73.2526	63.223
Bhlhe41	19.6452	19.3436	17.1574	24.5588	23.28	22.9029
Pcdhb5	34.2552	31.1453	31.2455	39.9348	40.4775	41.3626
Slc7a14	13.2191	13.6329	13.4733	17.0156	15.6139	18.1963
Gss	12.2646	11.8297	10.341	14.9763	14.5419	13.8875
Enpp3	9.14364	9.03284	10.0609	12.8218	10.6411	12.1313
Nrp1	9.04173	9.43359	9.12739	11.9952	10.9881	11.8294
RGD1309534	116.112	118.609	110.88	135.627	156.967	143.507
Acsl1	32.6111	34.6663	32.2793	40.424	43.3929	41.9265
Dynll1	380.459	390.683	334.151	449.893	489.8	456.497
Fev	10.764	10.7001	9.97823	13.9618	12.7245	13.0316
Tspan17	43.4155	41.7936	43.3739	50.0953	55.5975	56.7887
Slc39a10	12.6674	13.0257	13.1013	17.3828	16.2421	15.4053
Sdcbp	162.991	159.99	164.024	198.044	210.371	207.1
C2cd4c	66.2642	63.6318	58.548	70.1888	83.6573	84.4415
Abhd4	25.4621	22.4436	22.3047	30.2357	29.3871	29.227
Cntfr	165.006	151.184	168.603	196.391	208.737	208.914
Tarsl2	7.54784	6.5625	7.14632	8.03377	9.38416	9.51307
Kmt5a	175.95	172.786	171.943	198.93	231.784	229.857
Unc5c	6.9526	7.50573	8.81675	10.5154	8.61915	10.3995
Map3k4	10.2378	9.93802	12.4126	13.486	13.7855	14.0815
Nme3	123.704	125.013	94.4746	128.903	162.072	144.525
Taldo1	221.63	209.243	188.093	266.315	262.875	256.361
Ugt8	22.7895	21.5175	22.8989	28.3783	28.7653	28.1669
Icoslg	9.98083	9.49709	11.2429	11.7261	14.1685	13.1055
Vat1	108.146	105.851	109.511	135.005	139.512	136.314
Tmeff1	5.50668	5.16933	4.96987	6.48611	6.09917	7.3145
Tbc1d8	15.9499	16.0683	15.6583	20.9263	19.6083	20.1174
Cacng4	23.433	23.3443	26.2937	29.6434	31.7593	31.5887
Panx2	7.54029	8.17085	8.00239	10.2992	9.64144	10.2542
Nectin1	7.56966	7.88679	8.79585	10.3438	10.1593	10.4175
Fam222a	51.6011	51.9046	51.562	60.7905	68.1689	68.7872
Phkg1	31.4766	27.0844	34.1299	35.6244	40.9659	41.6227
Prkar2b	27.0859	29.8788	28.9148	34.3162	38.3688	36.8839
Cacna1c	9.24518	9.63488	11.0702	13.0763	12.3575	12.8144
Fxyd6	76.7943	81.5731	77.8978	101.732	101.399	98.6897
Cnksr3	14.5817	14.9912	13.9192	16.7256	19.2006	19.6434
Gprc5c	28.9978	27.9867	27.9568	37.6157	35.1199	35.96
E2f2	2.76292	2.75697	3.18625	3.69939	3.67145	3.77043
Sema6b	13.4216	13.0177	14.4986	16.1954	17.9612	18.2401
Csdc2	19.151	20.5996	20.0941	26.6517	24.0767	25.8813
Rflna	13.5443	13.5838	14.666	17.78	17.2116	18.5643
Fmnl3	10.5811	10.2807	11.3102	14.1279	12.7861	14.3313
Epha7	6.06424	7.03956	6.17129	8.05949	8.47419	8.18489
Cdhr2	23.0364	24.6096	26.0437	33.5424	28.8102	32.2457
Sqle	74.879	75.0992	72.1939	79.0368	108.292	98.0202
Cdh7	1.70389	1.64954	1.51106	2.10204	1.95087	2.19516
Tp53i11	57.9322	54.7593	58.2486	72.7273	74.0545	72.8945
Rab37	106.535	104.469	99.1528	126.464	136.834	135.684
Shc2	134.601	139.165	135.196	162.925	182.143	181.062
St6galnac5	7.21236	6.74762	6.085	8.0753	8.73297	8.98402
RGD1563962	5.16897	5.23433	5.83622	6.25722	7.43163	7.23792
Ybx2	39.6545	37.4639	42.6861	44.693	54.7492	55.122
Ddit4	14.0606	10.1141	10.416	13.7408	15.5828	15.3046
Cdc42ep4	16.261	15.8058	15.8777	19.8559	21.6	20.4241
Selenop	167.894	152.064	192.947	233.943	221.685	206.432
Golim4	27.6715	24.9016	31.1858	36.7537	33.9085	37.4803
Fstl4	24.634	25.9857	27.0886	34.3422	32.6098	33.3847
Cnn3	82.6038	78.5555	84.8516	105.679	105.854	106.276
Tmem231	6.61299	7.03389	5.95805	8.78434	7.90455	8.64166
Ier5	17.4593	16.1598	16.8421	20.1229	22.6642	22.4412
Lmo3	6.80663	6.54635	6.81203	8.50879	8.8271	8.73348
Sgsm1	17.9345	18.4671	17.7789	23.2857	23.1686	23.6129
Tmem229b	14.1704	14.5322	14.5551	19.7929	17.6466	18.5444
Ints8	16.3563	15.8366	15.3486	19.1699	21.9005	20.4586
Nab2	3.12468	2.78437	2.60892	4.13719	3.35375	3.53548
Synpo	7.80757	7.43243	9.0639	10.6856	9.72614	11.0623
Atp2c2	7.53082	7.67047	6.65488	8.85407	9.71631	9.73675
Bri3	162.555	164.147	116.45	180.454	205.509	188.327
Usp3	9.18482	9.58139	8.77572	12.269	11.6102	11.8239
Tmem131	41.4442	37.156	43.4125	56.0566	48.5188	53.6318
Fgfr4	22.827	21.6764	23.3411	28.305	29.7394	29.9511
Cmss1	26.6686	27.3402	26.8179	35.0395	35.4048	34.4065
Camkk1	8.97217	9.55275	9.34541	11.542	12.8675	11.7932
Ldlr	65.293	63.3534	64.8467	68.7302	96.6422	86.2346
Fam171a2	19.6997	20.9577	23.1932	27.7296	27.2083	28.1076
Dusp4	9.3147	8.65288	10.1833	11.0871	12.5166	13.0263
Igfbp7	62.233	55.1169	50.0873	66.5818	74.6753	76.6405
Adgrg1	36.8165	39.3043	40.2653	51.5887	48.1954	51.9714
Deptor	17.8068	16.1562	16.9586	22.5416	20.0061	23.8828
Trib1	21.2903	25.7704	20.326	30.0858	27.574	30.2518
Elf3	30.1391	30.3639	33.2331	41.4041	40.615	40.3266
Cyp51	93.5541	90.5058	87.7873	90.6189	145.473	118.829
Fads1	99.4807	102.523	93.4694	108.467	149.046	128.286
Litaf	47.3965	43.8602	44.2659	55.5837	64.2832	57.1151
Gtse1	27.4379	28.1343	30.1185	37.8925	36.3604	37.6959
Usp30	18.8926	18.7399	19.0578	25.1016	23.4347	25.5647
Svil	17.0344	16.6992	20.1967	24.5357	22.2032	23.7606
Mtus1	11.689	12.1164	12.3027	16.7939	14.8892	15.5235
St6gal1	3.23999	3.88318	3.59353	4.79166	4.5122	4.71081
Rps6ka1	36.8806	34.435	36.6715	47.5369	46.6684	47.1461
Mical2	5.63363	6.02827	6.4347	8.40867	7.41651	7.88379
AABR07017145.1	14.9099	16.4624	15.378	20.354	19.3567	21.542
Wls	20.9325	21.9646	24.1357	29.5891	28.458	29.8028
Tchp	15.5512	16.2731	16.1747	22.2158	19.2915	21.3984
Bhlhe40	49.6936	37.4962	46.2662	53.1558	64.7545	57.0285
Pak3	6.88778	7.10065	8.9076	9.40223	9.99593	10.6371
Hes1	6.53793	6.76697	6.86596	7.41812	9.83839	9.21607
Bmp1	10.2405	10.2606	10.8688	14.0127	12.6966	14.4817
Snn	11.897	12.4354	11.7422	13.9829	17.3082	16.1055
Sh2d5	33.8658	29.5257	38.0751	38.0205	48.8779	46.5611
Itprid2	8.8071	8.5562	9.12438	10.6744	12.1556	12.01
Bend6	9.68775	9.66572	10.5784	13.0286	12.3993	13.9447
Fras1	1.38739	1.43946	1.52493	2.15211	1.59508	1.97936
Crlf1	7.57982	7.14525	7.07939	9.54031	10.0377	9.11641
LOC100360573	98.2925	108.071	79.0493	129.792	138.041	107.902
AABR07010705.1	10.9573	12.0277	10.8256	13.847	14.9373	15.7285
Aldoc	10.2712	11.347	9.36661	12.101	15.816	12.8935
Rnd3	3.628	3.0385	3.91325	4.53053	4.60635	4.80791
Gpi	266.365	241.671	236.676	303.954	347.09	330.895
Impa2	14.3685	14.5708	13.7734	17.3834	18.9371	20.026
Tcerg1l	3.53543	2.55333	2.8344	4.02612	3.70481	4.04489
Rbm47	21.4156	20.2515	20.9837	28.7368	26.137	27.8179
Smoc1	18.2829	16.282	16.442	24.1742	20.9088	22.2762
Lurap1l	17.1656	18.006	15.8018	20.2402	24.0906	22.9885
Togaram2	2.64356	3.10605	3.19205	3.78568	3.93404	4.09245
Glud1	91.3238	86.5042	83.4938	116.634	113.343	115.645
Noc4l	19.9539	17.8216	19.7886	26.3628	23.9002	25.8955
AABR07033324.1	31.7482	21.7706	19.6559	32.8341	30.9999	33.0113
Plekhg6	14.1201	13.4658	14.7213	18.6865	17.1298	20.2099
Bmp3	3.51805	3.35006	3.76047	4.63397	4.8921	4.56849
Ccnd2	132.018	124.18	159.6	182.559	188.944	179.986
Rassf8	25.5997	25.0956	25.3259	34.2636	31.9399	34.7353
Nrsn1	27.772	27.6333	26.6137	36.2986	36.7004	36.0479
Ptpn4	9.29562	9.25507	9.6632	14.2078	11.2566	12.0536
Esam	15.111	13.2464	14.7294	19.0568	20.0727	18.2075
Acads	20.0179	21.0726	24.0951	30.7246	26.884	29.1459
Tmem223	70.5016	71.7998	56.4031	82.9244	93.5437	88.0091
Npc2	19.5198	22.2492	19.1417	23.4113	30.8904	26.7712
Gng12	48.6777	50.4417	43.1632	62.2824	62.3188	64.9371
Glce	7.36027	7.67157	7.49967	9.63017	10.291	10.1224
Ubtd1	12.5732	12.4176	10.2157	13.9663	16.2405	16.7637
Sncb	298.286	291.099	300.105	359.72	431.94	395.314
Hbs1l	28.2012	25.9046	30.592	37.3979	38.4279	37.2796
Rab3b	76.1203	87.1535	70.6784	111.646	100.362	100.682
Elovl7	11.7535	13.782	12.755	16.2546	16.0481	18.9056
Prph	497.553	484.509	464.164	605.193	667.319	664.892
Kcnb1	8.58083	8.24674	8.32245	10.8575	11.0105	11.839
Gadd45b	4.97472	5.05373	4.11801	6.25176	6.90756	5.80841
Ssh1	4.3539	4.6413	5.03587	6.95623	5.42157	6.43706
Zmat3	24.1335	23.1225	21.5558	31.2042	30.0667	31.0364
Shmt1	44.3334	41.1289	43.5741	57.1294	59.5861	56.5618
Idh1	32.7473	34.9036	29.8309	40.0931	47.0507	43.7947
Rnf165	3.83841	3.92216	4.54032	5.48554	5.61295	5.43188
AABR07036007.1	193.358	195.428	125.558	229.37	242.309	219.996
Stk32a	2.16749	2.54984	2.21513	3.33011	3.01473	2.97806
B4galt1	11.2823	11.3738	13.202	14.9704	16.2843	16.9712
Zmat4	6.36322	6.0063	6.60719	8.61913	8.33854	8.57161
Manba	17.116	17.5008	15.5346	23.7193	21.6402	22.1173
LOC100910506	10.0998	9.95696	9.79752	14.5799	10.3551	15.2391
Lpcat1	38.2398	38.3934	36.4346	41.9771	58.096	52.0982
Abhd14b	55.4589	65.4756	57.7408	80.9645	77.0518	82.6837
Prr11	8.02313	8.66557	8.20738	12.1248	10.5431	10.9277
AABR07065498.1	47.4915	46.8892	48.9213	64.3897	63.2601	65.9485
Coq5	15.9261	15.1828	14.9256	21.1445	20.2259	20.8456
Cspg5	9.93683	9.23175	11.499	11.6889	14.94	14.8541
Pc	44.1252	41.8115	41.0332	53.2159	59.9589	58.7357
Myo6	2.95052	3.0947	3.2664	4.56692	4.04747	3.99512
Tanc1	2.94955	2.53818	2.72057	3.68501	3.80926	3.62144
Pcdh1	25.5258	25.6326	29.1383	37.9544	33.1342	37.6727
Pgam5	29.8244	30.7886	30.6486	40.2692	41.492	41.9064
Adgrv1	2.46763	2.11976	3.02703	3.49021	3.27525	3.55624
Fasn	55.7808	52.7193	60.354	59.9671	89.3944	79.6241
Wnk3	3.09516	2.7405	2.84717	4.60347	3.58673	3.58687
Higd1a	12.6896	13.4914	12.5419	14.932	19.4085	18.2037
Pop5	26.3437	24.1268	25.2089	34.9942	34.4171	33.3395
Brinp2	5.7189	4.97755	5.84428	7.13279	7.65293	7.67237
Dlc1	4.61445	5.46307	5.73654	8.21995	6.44734	6.81143
Prxl2a	24.8134	23.6833	24.6587	30.0601	35.5161	33.788
Spred1	3.14145	2.7958	3.42792	4.36438	4.16111	4.1973
Srrd	12.4038	14.3857	11.0325	15.9913	16.5126	18.8885
Acaa1a	17.6962	18.3645	17.8123	23.8076	24.3631	25.0564
Fam57a	22.9587	26.0003	23.1844	30.8483	35.2469	31.9692
Chsy1	5.15442	4.63158	4.93954	6.24245	6.73633	7.06208
AABR07004894.1	17.8855	12.6574	18.0914	21.4763	25.4244	19.3098
RGD1560398	29.2454	34.9851	32.8284	41.3416	44.5251	46.385
Rnf5	130.579	129.91	114.397	154.348	186.338	170.173
Zfp605	5.42441	4.95296	6.49372	8.73552	7.32561	6.93157
Pter	5.51123	5.58137	4.74096	8.03738	7.11366	6.43126
Kcnh3	3.97981	3.10354	3.14737	4.76043	4.75594	4.43007
Pcbp4	28.2404	27.824	27.2309	38.1605	36.6303	38.7572
Ephb2	6.19084	6.31259	6.38155	9.02878	7.94407	8.77333
Itga6	3.68195	4.37531	4.39737	5.86517	5.40778	5.71138
Klhdc8b	27.1955	26.6756	24.1127	36.5474	34.3679	35.6476
Rcan2	18.7975	20.4998	18.597	27.2971	25.6294	26.2545
Zbtb7c	1.59166	1.86121	1.51279	2.56884	2.11826	2.11328
Lzts2	28.1244	25.9423	24.278	33.626	36.9485	36.7218
Trim24	14.3846	12.1807	15.7847	18.7693	19.266	19.9657
Gatm	11.8039	11.552	11.1081	17.1033	15.0627	15.0419
Rin2	6.23517	5.64332	6.47492	8.942	7.99781	8.20695
Osbpl1a	23.4222	27.1053	23.034	33.8089	34.4264	32.7813
Inpp5j	12.8034	13.0153	13.4232	18.7933	16.972	18.1284
Fam102b	5.42226	4.16233	5.28186	5.63667	7.66254	7.1212
Sowahc	7.14103	6.42574	6.87911	8.79137	9.96306	9.3438
Nrp2	0.953373	0.883344	0.925506	1.38836	1.1274	1.28055
Git2	26.3545	25.9437	25.5334	35.5852	35.0863	36.3145
Hsd17b7	1.79446	2.2734	2.23186	2.21541	3.39697	3.07061
Krt8	674.234	636.276	626.662	881.092	910.057	882.053
Spns2	28.4267	27.1405	26.8292	36.807	38.451	38.4454
Pdgfb	3.25481	3.63357	2.83041	4.2924	4.60387	4.53455
Rnf144b	4.25015	3.95319	4.00787	5.49382	5.73656	5.65146
Gas6	763.977	703.856	692.874	886.459	1072.17	1029.69
Parvb	17.8302	19.1629	19.3196	24.165	27.3303	26.4326
Samd11	2.43541	1.97849	2.6581	3.14353	3.47888	3.16956
Igsf8	46.5417	40.9188	41.3363	55.2357	62.702	60.4861
RGD1563888	7.06661	5.0053	5.96512	8.93178	7.31965	8.77929
Map3k20	10.6716	11.3574	13.2323	15.3765	16.2006	17.3737
Ube3b	18.2706	19.4123	19.1833	27.93	24.2656	26.8158
AABR07039210.1	8.49072	7.07385	10.1279	11.0483	13.0867	11.594
Dmrta1	8.1063	8.88594	7.53394	11.5234	11.273	11.3249
Ddx51	13.6763	13.4572	14.0778	19.4439	17.5051	20.4374
Tub	11.3873	12.4944	13.2151	16.1608	17.8589	17.6814
Foxo6	28.6644	27.6715	27.7586	36.6073	38.2401	42.36
Slc19a2	5.5812	4.96711	4.81337	6.51717	7.12159	7.78275
Il6r	12.3356	12.5927	13.5583	17.6689	18.6916	17.3197
Slit2	2.67029	2.67588	3.2327	4.08301	3.59673	4.28749
Galr1	3.25176	3.23928	3.27115	4.60703	4.8267	4.18847
Gprin3	29.4689	27.6307	29.8468	41.2899	40.5881	39.4973
Kcnip3	17.8714	17.3675	19.0474	22.1833	26.9557	26.6443
Igsf9b	7.39052	7.07866	8.34714	10.763	10.2943	10.8035
Tacc2	9.62111	9.97859	12.3733	16.2924	13.3203	15.038
Nefl	1.10929	1.18905	1.11641	1.44198	1.75765	1.5738
Rassf3	22.438	23.2092	24.1374	34.3273	30.4561	32.8037
Golga3	10.2173	9.52676	11.1349	15.1689	13.6042	14.4105
Hes6	42.8652	41.3407	37.6272	45.7581	67.6104	57.0248
Pygl	4.68205	4.17332	4.08285	5.86814	5.86519	6.38524
Rnd1	6.33274	6.16504	5.63336	8.24346	9.1277	8.06356
Ralgapa2	19.6783	16.853	21.8529	26.0038	28.681	27.2427
Nrtn	78.2511	79.5427	53.2268	94.136	107.573	94.5025
Pianp	3.67386	3.77965	4.11827	6.17546	5.11076	4.9581
Bcam	64.5088	67.9873	66.4758	87.5015	94.0174	97.8316
Stk32b	10.8138	11.3089	10.4022	15.9468	15.0776	14.6605
RGD1561916	4.26969	3.57731	2.98862	4.70601	5.12346	5.39394
Ssc5d	13.4992	12.615	15.3579	21.046	17.3963	19.8937
AABR07050449.1	8.96321	10.6892	9.27445	13.8257	13.7392	13.1467
Angptl8	25.1051	24.9987	17.3894	30.6763	36.831	27.4872
Psd	15.5791	17.352	15.6367	24.1243	21.3583	22.9204
RGD1305807	3.74314	4.12284	3.8237	5.03291	5.45455	5.98237
Nln	27.3033	26.6616	27.6567	37.9202	38.7743	38.3774
Mmab	5.82984	6.84004	6.70421	8.67321	10.1709	8.49224
Car2	2.73881	2.88884	2.67506	3.56808	4.49326	3.66303
Gltp	55.2212	53.4661	52.9747	75.5557	77.8495	74.948
Fas	1.71049	2.28343	2.24831	3.05609	2.80584	2.95767
Pus1	13.7893	13.8903	12.6098	18.4048	18.5588	19.982
Xylb	1.02621	1.13752	1.10224	1.49385	1.60027	1.52251
Fbrsl1	21.0796	20.735	23.1198	29.5813	30.2227	32.0491
Tgm2	9.43647	7.79643	11.9233	13.0417	14.3265	13.904
Dcst2	3.9927	4.1142	4.22071	5.77488	5.73922	5.93946
Srd5a1	5.24646	5.0912	4.8547	6.97052	7.64519	6.89672
Pitpnb	110.922	102.645	103.526	145.937	154.4	149.127
Pdlim1	77.6795	73.7246	68.3716	99.7043	107.482	104.834
Tspear	2.62209	2.39841	2.3467	3.5204	3.4014	3.54346
Tmem41a	35.3246	32.4686	28.4759	46.0478	42.3004	48.4244
Pcbp3	15.6669	16.2519	16.8211	22.8293	22.5571	23.878
Acat2	37.3891	33.2867	34.8091	37.7159	60.8823	51.3332
Rasal1	3.87893	4.27516	4.53615	6.20967	6.09165	5.73975
Fam89a	4.17129	4.22105	3.25935	4.11799	6.04763	6.40025
Kcnh4	0.902888	0.798522	0.791936	1.30566	1.06961	1.17172
LOC691995	9.21853	8.39269	8.35771	11.7633	13.6352	11.5553
Igsf11	5.35672	4.97705	4.75414	7.34107	6.99124	7.14324
Chfr	33.6989	35.246	33.4288	49.3774	46.3549	50.215
Ttc25	9.58135	8.21527	11.6591	11.872	15.6932	14.4416
Pnck	4.34131	4.12656	3.77217	6.11429	6.11812	5.23084
Tox	3.98009	4.35591	3.87403	5.97	5.75114	5.70536
Vamp8	68.8996	80.6272	90.2543	119.363	115.675	107.215
Ankle2	15.781	14.1028	15.7861	22.7258	20.952	21.594
Kif19	3.21023	3.56594	4.29166	5.31364	5.18258	5.3409
Cdk5r1	56.8825	55.8124	55.9211	68.4126	87.3677	85.5008
Stard5	42.3332	40.8162	37.9453	56.3095	58.6681	58.3079
Anxa4	69.6944	69.2263	64.0486	99.6562	95.4469	95.3836
Rras2	24.0733	23.2232	25.8938	32.9772	36.569	35.2755
Slc44a3	13.3475	12.6233	13.1505	17.6248	20.1679	18.2616
Glul	58.6518	59.3106	60.7712	86.0152	84.582	85.5259
Ankrd13a	55.5152	56.4811	57.0763	80.3572	78.0516	84.0778
Myo1d	32.0609	31.893	31.8334	48.3972	44.0102	44.975
Ep400	18.7582	18.0854	21.1524	28.9203	25.7056	28.5634
Atp7a	2.65553	2.60341	2.57945	3.78133	3.66553	3.82424
Sez6	47.6895	45.9742	49.4533	69.1639	66.6892	70.0817
Hnf4a	27.5402	27.3554	28.2584	38.8944	40.0089	40.7809
Ccdc155	1.60306	2.25054	1.94103	2.49731	3.06086	2.78572
Slc19a1	4.91526	5.02075	5.0703	7.36579	6.94095	7.30241
Rab40b	10.5741	11.5642	9.33459	14.7431	14.7605	15.8382
LOC360919	2.63145	2.34191	2.54446	3.67754	3.8918	3.26171
Nfe2l2	16.8466	16.1562	15.632	24.2586	23.2654	22.5588
Net1	33.7148	36.3824	35.8859	51.5341	49.9083	51.3749
Slc25a1	89.1441	89.7491	83.2331	113.896	136.767	127.416
AABR07034445.1	10.1068	8.08973	6.98219	12.7344	13.0837	10.5127
Glis1	4.06246	4.78883	4.01471	6.48507	6.34248	5.74159
Arhgap26	0.918639	1.05405	1.00901	1.58451	1.22631	1.49264
AC126148.1	47.6238	48.843	46.0802	72.4125	70.4972	62.904
Dnah9	2.43194	2.54589	2.49349	3.56677	3.38528	3.84058
Mat2a	66.779	66.891	66.7677	95.2926	98.0735	96.2967
Tnfsf10	1.50349	1.2418	1.50791	1.99959	2.04575	2.10488
Dpp10	1.67849	1.24484	1.72368	2.24341	2.21151	2.26569
Csrp2	102.416	108.904	82.3628	143.656	145.748	135.482
Plk5	25.0449	25.7979	26.7099	32.0667	40.7476	39.3869
Slc44a4	12.0746	13.3192	12.178	20.253	16.2741	17.8565
Mvd	20.3412	19.7608	16.4337	21.6855	31.8505	28.3077
Klhl23	10.5639	10.3224	10.6295	14.1281	16.1138	15.3911
Fzd7	2.12371	2.50693	2.20677	3.40654	3.19649	3.31376
Olfml2b	0.819263	0.800255	0.63761	0.994434	1.08685	1.19595
AABR07058422.1	28.6872	29.1173	30.5033	41.866	41.7433	44.6099
Mt3	13.7456	16.5798	10.1078	20.3477	18.1744	20.2024
Insr	4.17036	4.26524	4.4823	6.50131	5.62644	6.64936
B4galt5	81.6614	75.1089	78.2456	94.5721	131.877	116.059
Adora2a	2.1757	2.45017	1.96764	2.87153	3.0964	3.64297
Id1	57.0876	49.1836	49.6475	63.8306	81.9109	81.6503
Kctd10	34.943	34.3537	36.5681	51.9683	51.7297	50.7593
Aen	20.1549	20.5187	20.6295	30.3378	30.2661	28.8404
Tfip11	19.6357	19.5539	20.8509	29.7823	27.0402	30.8383
Pmvk	37.1904	34.0475	32.3876	43.5688	56.9039	50.8484
Nedd4l	14.9395	13.5929	14.8513	22.2716	20.6132	20.4725
LOC691113	5.1465	5.40551	5.02012	7.48399	7.29806	7.97616
Tmem150a	8.04537	7.67068	6.63762	11.7593	10.5186	10.4007
Pcsk6	7.93585	7.22776	8.10702	10.7449	11.4481	11.8274
Adam11	1.93595	1.86866	1.9962	2.86093	2.81781	2.8018
RGD1311899	119.429	115.961	109.862	168.144	169.626	167.063
Ezr	23.6946	24.1247	23.4924	35.5085	32.9991	35.7759
Sppl3	32.5468	33.3789	35.0572	48.8717	48.1786	50.6497
Unc5a	48.8447	42.3793	53.2712	62.8546	73.9239	74.7503
Ggcx	17.0348	16.5882	18.8605	27.846	24.6067	24.4394
Lrtm2	3.81309	4.17287	3.52841	6.17778	5.27997	5.41487
Srsf9	74.4319	76.6776	64.7328	96.1185	106.341	114.134
Cpne5	3.41513	3.20249	3.04847	4.77721	5.01272	4.39823
Rtn4r	6.26754	6.50759	6.45718	8.36465	10.7207	9.19889
Kcnj4	0.797688	0.74472	0.668683	1.13091	0.986075	1.13748
Hscb	14.6478	16.4309	13.8769	21.1616	24.2146	20.7933
Mlec	116.228	110.571	115.168	163.535	169.688	170.153
Rasgrp3	1.51577	1.40317	1.54453	2.00327	2.24749	2.32037
Zfpm1	19.2997	17.8774	21.3479	28.0297	29.8789	28.3298
Cdc14a	5.19401	5.53214	4.82296	7.99292	7.10599	7.84773
Ier5l	2.02648	2.55792	2.11729	3.75822	3.32918	2.80334
Cltrn	29.772	26.1311	33.5646	39.1072	50.9561	42.0977
Rab43	23.7405	20.7814	24.319	30.1218	36.5591	35.0691
Tpst2	33.3978	35.8566	31.9373	46.443	53.1013	50.3653
Ypel2	17.8569	17.6522	18.6304	26.7758	25.6898	27.7734
Cabp7	2.53	2.58971	2.09716	4.13343	3.3623	3.2161
Insrr	26.5414	28.2216	29.2202	45.6539	38.1253	40.8944
Cd300lf	9.46979	8.21482	11.1648	14.1614	13.9562	14.7513
Mrap2	5.48611	4.06386	5.2972	6.54805	7.91879	7.61203
Hpcal1	22.9488	23.2497	22.4973	32.4897	35.2388	34.4485
Acaca	22.804	20.2491	26.8651	28.918	40.0024	35.0906
Trank1	0.316752	0.351861	0.39753	0.56929	0.455388	0.563567
Pcp4	200.179	196.66	198.973	289.905	322.579	275.239
AABR07045058.1	1.4873	2.08353	2.07343	2.97104	2.93941	2.50031
Psph	57.7436	60.3058	52.2357	69.5777	103.412	80.7822
Kcnmb2	8.58617	9.55181	9.06055	12.6191	13.8386	14.0854
Plppr3	43.3815	43.6082	47.1201	60.4473	70.404	69.0765
Ppp1r16b	2.49212	3.06044	3.02304	4.54749	4.13424	4.12309
Clic3	0.736504	0.549176	0.740002	1.05805	0.902239	1.06491
Alk	2.39854	3.13416	2.94933	4.28737	4.11835	4.27484
Rbm38	9.02455	11.1325	9.07391	15.4366	13.9917	14.3012
Pwwp2b	7.23211	7.17267	7.32623	11.1173	10.0739	11.3479
Crabp1	68.1662	65.1598	56.7681	88.9546	106.581	89.127
Prr15l	20.7946	20.4001	19.7091	29.0758	33.7086	28.4315
AABR07015003.1	2.32332	2.80248	2.71248	3.94733	4.44646	3.3513
Lamb3	12.5371	12.074	13.4211	19.5094	18.8218	18.7025
Mapkapk3	1.03146	1.17725	1.00986	1.87103	1.3367	1.61912
Acat2l1	5.78576	6.56197	6.57219	8.54263	10.6607	9.17267
Nqo1	2.41002	1.9456	2.03178	2.77944	3.83115	2.9723
C1galt1	44.9827	40.6454	53.6414	58.8892	77.2446	73.2296
Rgs22	6.00924	5.69518	6.60451	8.87364	9.63667	9.01524
Calml4	56.048	62.4392	60.3087	88.5475	94.5599	85.8569
Dusp5	4.36696	5.40893	5.5127	7.72076	7.82822	7.48473
Prodh1	1.15153	0.965044	0.865095	1.17765	1.43929	1.88664
Pole	7.24577	6.77161	8.09189	11.5427	10.6591	11.2121
Glipr2	4.58838	4.12376	5.04167	6.9612	6.68718	7.14192
Mvk	23.7178	24.1614	22.6613	28.5139	41.3136	36.907
Ung	26.6424	27.4242	27.2983	38.7369	42.5683	41.8737
Sdk2	11.3668	10.1053	13.1503	18.1213	16.6194	17.7026
Cyb5r3	52.2289	57.2834	57.4287	80.8267	88.5342	83.6194
Clic5	19.5951	21.0583	21.8685	34.266	30.309	30.1876
Igf2	241.836	248.129	281.35	391.09	381.552	396.562
Fabp5	133.224	122.098	144.961	163.49	239.587	203.771
Dclk3	3.55016	3.29364	3.77005	5.73386	5.14112	5.21776
Slc8a2	62.023	54.3807	59.6562	79.4792	96.6219	91.222
Pla2g1b	6.48002	6.90741	4.86562	10.2736	9.77537	7.67521
Rnf10	102.873	100.888	108.925	164.005	149.414	161.616
Svop	18.7031	17.2905	18.2033	27.3283	26.7053	28.4584
Slc15a2	2.39258	2.29134	2.55236	3.54527	3.95207	3.52171
Tmem200a	3.96476	3.42447	4.0722	5.27648	6.32115	5.86865
Frk	1.03814	0.688883	0.960607	1.45213	1.21577	1.42957
Edil3	2.83692	3.00209	2.72406	4.07468	4.59056	4.40775
Tgfbi	16.3475	15.5816	16.6265	25.8734	24.1074	24.2104
Abtb2	2.11829	1.81854	2.16496	3.46069	3.01428	2.84906
Ptger3	14.8865	12.0706	12.1868	18.4944	20.7354	20.5989
Alpl	5.68526	5.96209	5.94852	9.83625	8.38575	8.69047
Cacna1g	11.6351	11.9818	12.3067	19.4805	16.8644	18.6035
Sh3kbp1	16.4442	15.421	17.6538	22.4493	27.5799	25.8936
Prex1	17.7022	15.5517	20.5733	26.0126	27.6474	29.1026
Ptprv	1.62911	1.83649	1.97503	2.82135	2.68513	2.8652
Limd1	2.03438	1.9867	1.68122	2.97413	2.89092	2.92312
Ano8	12.3642	12.3913	12.7859	19.3972	18.6004	19.9322
Hapln3	1.57297	2.29583	2.10514	2.705	3.69445	2.82432
Iscu	72.1286	79.2941	66.2201	103.509	115.379	117.275
LOC100364435	478.974	487.962	511.216	744.12	825.993	715.005
Ncald	25.9595	26.1829	25.1907	40.9959	39.8346	38.7887
S100a10	239.193	242.233	178.592	325.545	373.935	322.313
Ctnna2	7.93422	7.02243	8.63003	11.9268	12.263	12.3463
Fam131c	19.961	18.4257	19.1151	30.6136	28.6784	29.7833
Mycn	3.61715	3.55242	3.2803	5.3746	5.22648	5.61034
Ccng1	126.699	130.627	139.783	204.173	212.111	200.947
Dhcr24	77.1688	73.7392	70.7051	90.4537	136.197	117.868
Txnip	118.327	117.222	153.076	172.592	221.756	209.989
Stbd1	3.79747	4.04982	4.01925	6.07129	6.09062	6.30193
Sart3	24.6435	25.0393	27.1857	41.135	37.7768	40.9071
Tenm4	0.701107	0.667296	0.891431	1.36248	1.02116	1.14038
Epha2	0.446397	0.539166	0.449451	0.743565	0.775176	0.724972
G0s2	58.419	48.691	52.0142	66.8913	97.5332	84.38
Nkain1	7.48755	7.35647	8.13018	11.7056	12.6772	11.5635
Pklr	45.9447	41.7306	43.516	58.9675	73.5632	73.0373
Gabrg3	10.5995	11.2968	11.4079	17.5753	16.8753	17.8025
Tppp3	3.55446	2.87923	3.10567	5.39046	4.50791	5.0813
Ttyh2	14.667	15.0645	16.8384	24.4174	23.7432	24.9744
Gng7	12.8585	12.606	11.7839	17.8475	20.076	20.7006
Fmn1	0.718411	0.739266	0.766796	1.11435	1.19798	1.19918
Ucp2	367.462	366.016	354.15	583.825	561.393	574.19
St8sia2	9.56553	10.399	8.35637	16.4094	13.0895	15.2767
Id2	4.78867	5.48777	4.75539	6.58045	8.68567	8.51027
Nnat	781.623	744.816	656.432	1111.37	1211.49	1132.37
Rasa3	33.2203	31.8616	32.5708	51.9074	51.7369	51.0688
Plekhh3	15.4532	14.0752	13.3848	20.9034	23.1	24.0094
Mgat5b	3.62471	3.97609	4.32359	6.53972	6.03944	6.34171
Bst2	10.3496	10.0894	7.51746	16.3541	13.0693	14.9814
Sgtb	62.6231	52.5148	64.308	81.0199	105.501	98.6495
Cplane2	3.99257	4.08997	3.98124	6.01419	6.84626	6.33069
Kitlg	5.04888	4.20253	5.5023	6.65424	8.71217	8.11302
Riiad1	3.25643	3.76757	2.76709	4.9091	5.21396	5.45972
Ntng2	3.20568	2.01632	3.13661	3.85789	4.85757	4.59236
Sult2b1	3.97791	3.43084	3.5205	4.89122	6.75906	5.77236
Smim23	4.43337	4.57186	3.10661	5.28067	8.20608	5.82356
Gpr176	2.04466	2.16814	2.09235	3.05198	3.58964	3.43649
Grm4	3.06896	3.13952	3.13648	4.96857	4.7883	5.2476
Pllp	8.14316	7.67348	7.42416	12.4993	13.027	11.8003
RT1-CE5	3.9997	3.77893	3.29447	6.23808	5.73319	5.81845
Hpca	1.42155	1.93431	1.40853	2.78256	2.52699	2.35694
Ulk1	21.624	22.1444	24.6907	36.4523	35.869	38.0103
Micall2	9.57499	9.75998	10.4089	16.0672	16.3195	15.5624
Nrgn	15.8724	15.366	14.7235	28.046	21.5181	24.5507
Chpt1	3.09881	3.786	2.21054	5.21634	5.28673	4.19905
AABR07062154.1	1.72959	1.23378	1.15345	2.18792	1.90412	2.56929
Oas1f	11.9216	11.6027	11.0075	17.3193	20.4832	18.2565
Phlda3	28.0136	25.5165	23.1564	38.9859	40.7773	44.7375
Slc25a10	86.3043	80.1407	86.8881	130.97	141.882	138.653
Sh2b2	5.34317	5.03887	6.4054	8.20259	9.25866	9.81991
Ptcd3	13.6327	12.8931	11.9385	20.412	20.9031	21.2538
LOC100362814	1.46091	1.36932	1.34813	2.19481	2.30117	2.31246
Cox6a1	762.508	762.547	523.784	1023.36	1218.36	1097.85
Foxa1	2.59449	2.32051	2.30333	3.91482	3.85079	4.01382
Nnmt	2.61629	2.74236	3.5843	4.12045	5.73365	4.74332
Fat4	0.18233	0.163419	0.264399	0.260785	0.406021	0.329468
Rhbdl3	23.0737	22.2771	22.4032	37.949	36.0016	36.9287
Arl4d	6.5303	5.46361	6.83836	8.92708	11.6066	10.2936
Wdr66	5.58375	5.51201	6.13891	9.10139	9.67046	9.4906
Cngb3	3.39628	2.95077	4.11905	5.16235	6.58436	5.42386
Nr2f1	2.03891	2.38601	2.41842	3.62778	3.10992	4.49722
Micalcl	1.91618	2.12339	2.35603	3.81741	3.4225	3.28328
Pi16	2.07662	2.35447	2.12828	3.90243	3.28207	3.60965
Mgmt	37.7076	41.4324	35.256	63.4618	65.1417	59.9726
Chek2	8.42996	8.49011	10.4394	14.8701	15.2525	15.0004
Unc5d	6.76317	7.27403	7.76577	12.5803	11.6907	11.7525
Arhgef2	5.62556	5.07413	5.49286	8.71311	8.37309	9.67771
Krcc1	24.9974	24.8055	24.9458	41.1252	43.358	39.2608
Neu3	1.81533	2.36685	2.58135	4.01575	3.22395	3.96056
Zdhhc22	1.56896	1.14624	1.71935	2.11419	2.5667	2.66609
Hspa12a	9.65336	8.64968	11.0354	14.6859	16.2519	17.7125
Fgb	2.8096	3.31272	2.82744	5.39954	4.60135	4.84674
Ddah1	2.15891	2.53621	2.42383	4.11765	3.89997	3.79988
Gcg	2.21388	1.84715	3.34354	3.86278	4.17024	4.263
Il20ra	5.02495	4.64234	5.17554	8.04464	8.63908	7.96983
Tmem86b	21.8452	20.734	19.9438	39.5254	33.0392	31.5364
Adcyap1r1	13.2176	13.3715	14.4639	23.0706	22.6532	22.6583
Caly	2.12885	1.90978	1.50369	3.26157	3.29829	2.68211
Rnf181	19.5652	18.1419	15.8877	30.0563	29.7294	29.6206
Tp53inp1	4.49393	5.85377	5.92322	8.04745	9.76376	9.34349
Insc	0.398206	0.44184	0.490249	0.755933	0.771403	0.695125
Pld1	0.505715	0.582203	0.7546	1.12788	0.95206	1.0006
Klf8	0.347395	0.275566	0.410603	0.634599	0.647269	0.44695
A1cf	8.44215	7.81108	8.60136	13.0896	13.7057	14.8122
Slc12a7	23.6475	24.8234	25.5556	40.7036	40.9968	42.3787
Eepd1	5.84792	5.90114	6.45354	9.26468	11.0124	10.3186
Polr1a	2.56562	2.37564	2.83758	4.7488	3.85256	4.48117
Nkain3	2.90428	2.41241	2.19536	5.14577	3.95716	3.53476
Slc17a7	7.15551	8.40123	7.84452	13.6549	12.5137	13.2264
Hps4	13.6017	14.9181	12.9358	23.0289	23.2216	23.8388
Gstm1	14.6084	14.4438	12.5899	23.8284	23.7094	22.9149
Sema5a	0.290834	0.27406	0.1749	0.521537	0.312523	0.417579
Atoh8	0.814274	0.833773	0.724231	1.21824	1.1112	1.68628
Garnl3	3.47915	4.1503	3.77449	6.31774	6.77102	6.23486
Rin3	2.21488	2.35418	2.31447	4.2296	3.3196	4.12114
Smad3	1.23851	1.43659	1.28919	2.20407	2.20465	2.31904
RGD1306556	8.76775	8.86953	9.96764	15.1607	15.0406	16.6684
Reep6	56.1308	53.3514	57.8246	105.429	87.4999	91.6419
Fars2	17.0209	17.8186	15.0641	27.3982	30.5055	27.1942
Ppp1r3c	1.27574	1.08195	1.4507	1.87711	2.44285	2.19053
Wnt9b	1.94932	1.40676	1.99857	3.05619	3.10244	2.99746
Mrpl35	8.91199	8.45337	8.91076	15.557	15.0672	14.3109
Nav3	0.150619	0.210645	0.254257	0.389245	0.250786	0.41317
Baiap3	12.3485	14.358	13.4014	24.366	20.0464	24.2153
Hist2h2be	6.98613	7.04321	8.42042	12.4149	12.8641	13.1942
Nt5e	3.72965	3.28391	3.65102	6.13107	6.39842	5.75465
Arhgef19	0.39902	0.339897	0.407931	0.494588	0.667068	0.806226
Ceacam1	17.696	16.5779	19.7592	29.2097	31.7255	31.8544
Pde2a	17.8333	15.2492	18.8591	28.5123	30.0562	30.6731
Hoxc6	0.890959	1.3764	0.984287	2.15501	1.73172	1.70311
Nxph4	5.05241	6.09394	3.76889	9.63427	7.73579	8.32224
Chn2	5.39592	5.52707	5.60631	10.1964	9.38659	8.94866
Ephx1	5.50029	5.22144	4.61723	9.79158	8.0129	8.67343
Adarb1	7.66721	7.44339	8.66649	11.851	14.4291	14.7652
Chmp3	42.1365	42.0384	52.2691	76.8009	79.6792	80.0175
Smpdl3a	1.45866	1.65127	1.81117	2.80943	2.65423	3.0668
Clca2	0.340403	0.307404	0.325673	0.426516	0.503304	0.758233
Sema3e	6.11472	6.00506	6.45282	10.0045	11.5527	10.6574
Ddc	11.1558	9.95023	9.19833	17.4275	17.9851	17.1823
Tmem51	3.5495	3.34364	4.09062	6.07839	7.07444	5.92683
Acan	0.278179	0.264261	0.296301	0.432446	0.499713	0.52986
Clec2g	7.84856	6.58174	5.7152	11.9285	11.6959	11.5252
Rab6b	7.56169	7.54725	8.41076	14.771	12.1818	14.0887
Rgcc	1.93928	2.01702	1.19433	2.24642	3.90879	2.83588
Rnf103	18.0953	16.8298	18.483	31.1686	29.8821	32.2681
Grk3	23.8697	22.5681	24.1311	45.5936	38.1159	39.6883
Cabp1	8.96285	9.8963	9.28368	17.2204	15.929	16.1116
Rasgrp2	2.84922	1.85399	2.622	3.24946	5.28894	4.34796
Tgoln2	50.036	49.0944	53.0861	92.5083	86.7546	89.0843
Hepacam2	78.0792	84.3738	81.6957	145.863	144.873	140.079
Pycard	3.9705	3.63345	4.46154	7.99578	6.22998	7.08799
Jakmip1	6.75489	6.80309	7.04599	10.7498	12.8584	12.8217
Ddn	0.593302	0.900742	0.82171	1.55953	1.31344	1.22528
Perp	26.3945	26.0314	23.4509	44.2481	45.3645	45.2702
Abhd15	1.93985	1.58901	1.84031	3.5206	3.07007	2.96927
Efna3	48.4907	41.7606	41.2016	66.5731	83.5494	84.2218
Rhbdl1	1.16901	1.2607	0.843613	2.24683	1.75678	1.84861
Slc12a8	5.56006	4.8081	4.11676	9.41664	7.14808	9.33261
Gipc2	10.9796	10.571	12.4307	19.4795	21.3734	19.9078
Zcchc24	1.24589	1.20923	1.16229	2.28953	1.86365	2.31556
Vil1	16.4921	18.63	20.7784	36.0841	30.2871	33.7117
Wnt5a	2.05281	2.17899	2.04719	3.206	4.03548	4.00137
Lrrc39	3.54413	3.7657	3.46195	6.89194	6.07994	6.36288
Retsat	18.9331	19.3225	18.1266	34.7686	33.5958	33.0384
Notch1	0.816418	0.701333	0.681678	1.3992	1.15854	1.39921
Htra4	0.930966	0.992599	0.882366	1.74362	1.58001	1.729
Cdh1	15.2507	14.2252	14.4728	27.6875	25.998	25.509
Ppp1r17	2.6383	3.51135	2.77524	6.15874	5.8013	4.18622
Usp39	12.1756	10.2656	11.4201	21.295	20.9725	19.1957
Crebbp	2.83217	2.47109	3.49493	6.04941	5.04291	4.88491
Il16	0.204401	0.233885	0.279138	0.463019	0.426278	0.41425
Kcmf1	42.0004	42.3049	38.3295	67.132	79.2215	76.615
Aspdh	2.32998	1.79298	2.58879	4.2177	3.82588	4.18233
Dcaf7	36.7224	37.0665	40.9214	70.529	67.5348	71.2159
Mgll	3.06576	3.07145	3.41916	6.39502	5.4573	5.58816
Suclg1	53.3067	51.8335	49.5082	93.5386	97.9865	91.1374
Rpia	12.0728	12.3378	12.383	21.2332	22.2914	23.8289
Eml2	12.0098	12.7429	11.0799	21.7233	21.2108	22.7946
Islr2	1.14604	1.14655	1.54259	1.86579	2.84641	2.3388
Dnah8	5.74365	5.89935	6.23831	11.3466	11.3171	10.2501
Kdm3a	9.04907	9.92799	10.2697	18.3098	17.0185	18.6402
Slc9a3r1	114.203	101.228	111.179	186.056	209.068	209.247
Mrgprx1	1.05624	0.705015	1.14527	1.66846	1.81345	1.89827
Ece1	41.8209	42.2449	44.4477	76.2035	79.5658	82.7434
Prss30	0.843871	0.825196	0.619684	1.30297	1.61411	1.3481
Reep1	8.58909	9.47962	8.97522	16.206	17.2116	17.0272
Elmod3	4.67368	4.56197	3.8933	9.26789	7.30389	7.93958
Rprml	74.1365	73.3084	72.7865	128.775	145.145	137.607
Eif2ak3	5.88973	5.11807	5.22428	9.03394	10.6196	10.729
AABR07058158.1	6.27397	6.18807	5.95121	11.4768	11.8334	11.1594
Mab21l4	1.47873	1.78711	1.34309	2.89627	2.65192	3.09302
St5	1.96222	1.9576	1.81917	3.57889	3.33398	3.85395
Sh2d3c	10.412	10.4435	9.09638	17.9547	18.9477	19.3627
Kcnab3	4.54113	3.88368	4.3212	6.32165	8.8892	8.79415
Immt	31.7148	32.5545	31.191	57.4561	60.4481	61.8928
Cacna1h	11.3524	11.2037	13.0553	22.4066	21.8813	22.9022
Inka2	1.83953	1.82329	2.06987	3.80876	3.43248	3.61637
Coro1c	70.9712	65.7278	74.3942	122.214	145.314	133.688
Fhod3	6.58811	6.07924	5.8237	11.3294	11.8792	11.94
Plk2	3.33372	2.94696	3.57073	6.25176	6.40022	6.08073
Dgkg	1.20557	0.955491	1.38245	2.62549	2.01671	2.10575
Cntn4	0.246468	0.231536	0.254518	0.420992	0.519077	0.457835
Igfbp4	16.0642	15.7	17.2126	31.4932	31.6201	30.4544
Dnajb13	0.35996	0.492853	0.548997	0.880186	0.791059	1.00915
Rmnd5a	29.4324	27.703	31.1155	54.4903	54.3904	59.9935
Pkib	10.5231	9.74727	9.38121	18.6609	18.7837	19.6712
Mcub	1.4383	1.31089	1.73938	2.34337	3.38457	2.92025
Fbn2	1.79237	1.58093	2.17818	3.63688	3.2132	3.89235
Hsd11b2	0.560464	0.473217	0.373973	0.932363	1.14879	0.648689
Efhd1	0.640187	0.905492	0.796855	1.3404	1.23417	1.98384
Kcnk16	12.8956	10.7409	10.8659	21.8741	23.7949	21.8415
Tns1	0.0986495	0.139261	0.151753	0.279197	0.176613	0.3071
Atf3	1.45079	1.24334	1.0071	2.10007	2.92998	2.21885
Ptprd	1.32513	1.59842	1.90943	2.98417	2.96568	3.53728
Ms4a8	3.83847	3.68252	3.50199	7.45976	7.3569	6.83523
Kcna6	2.49685	2.45428	2.72463	4.96182	4.71935	5.40476
Gpr146	6.67949	6.53595	5.86713	12.4484	11.7646	13.3083
Sez6l	0.816327	0.769017	0.633586	1.58846	1.25245	1.53752
Gstm6	0.705823	0.821443	0.403685	1.31564	1.46165	1.03478
Dzip1l	0.999041	0.944063	1.23105	2.28134	1.81778	2.16753
Lgals9	12.4151	13.3307	13.9653	26.423	24.6883	27.3595
R3hdml	0.84785	1.09213	0.829459	1.60453	1.54454	2.32761
Phactr3	1.23848	1.61657	1.0743	2.42482	2.89668	2.44912
Ifitm1	1.68407	1.66169	1.32699	2.43246	3.98256	2.82771
Hs3st1	3.03477	3.31039	2.30468	4.88283	6.60765	5.66188
Adora1	18.1618	16.5348	18.006	35.8253	34.0858	34.8413
Cdkn1a	26.0281	25.9617	26.2626	51.1723	53.1211	52.0464
Ano3	0.539804	0.530001	0.349565	1.04535	0.929897	0.862864
Plcl1	3.69575	4.10783	3.93189	8.19	7.13604	8.24593
AABR07026536.1	0.213531	0.190037	0.282416	0.436537	0.40158	0.54097
Fgfr3	5.11942	5.12642	5.12937	10.1901	9.72123	11.0308
LOC688553	1.50937	1.75173	1.57341	3.17279	3.84092	2.73141
Myo15a	0.683252	0.706777	0.870608	1.62391	1.34159	1.59521
Elfn2	1.31602	1.35241	1.34474	2.60301	2.81024	2.69124
Ackr4	0.381648	0.468174	0.354701	0.92722	0.765048	0.744962
Crybb3	5.12211	4.50898	3.54447	9.11736	9.15354	8.46086
St6galnac3	0.418792	0.408551	0.261977	0.610648	0.730084	0.872489
S1pr3	0.362052	0.446945	0.379907	0.835324	0.707428	0.878641
Trim7	0.488328	0.989918	0.49167	1.12393	1.33028	1.56476
Aqp5	2.78917	2.45629	2.71438	4.8855	5.87282	5.56629
Slc9b2	3.76264	3.57376	3.93777	6.12945	8.98111	8.14059
Ptpro	0.107506	0.18452	0.0999149	0.22209	0.193014	0.39669
Gcnt2	16.6445	15.7709	16.7259	31.0252	35.9524	34.9365
Gpd1	51.9178	47.1336	57.7032	101.932	113.292	113.093
Ass1	14.5075	14.1143	9.8458	25.3832	28.5359	27.1182
Dennd2c	0.387655	0.199738	0.29202	0.452934	0.53133	0.871851
Nfatc2	0.162941	0.260023	0.219321	0.540209	0.435257	0.38325
Gfod1	2.41404	2.11074	2.34856	4.43608	5.15392	4.97046
Guca2b	9.13225	9.78107	9.6632	17.4598	22.1544	20.9779
Odf3l2	0.847743	0.421614	0.764713	1.7346	1.27398	1.32557
Cfap43	0.157903	0.108099	0.229539	0.392439	0.333666	0.333028
Lgi3	0.200491	0.256494	0.454191	0.509333	0.609272	0.829581
Cyp4f1	14.952	13.4397	15.2928	28.8322	32.9743	31.7003
RGD1564865	1.46653	1.82389	1.83478	2.99813	4.30751	3.67766
Grm2	2.44269	2.25474	3.09729	5.12126	5.88572	5.72482
Pcdhb9	0.196733	0.210104	0.365684	0.733019	0.486388	0.440728
Tmie	0.272035	0.163776	0.20821	0.644179	0.382436	0.361159
Egln3	5.10823	4.97321	4.86419	10.3402	10.7981	11.1218
Ramp1	51.9351	36.5552	43.293	74.9964	119.09	90.406
Tst	1.36982	1.35456	1.36151	3.34609	2.50863	3.01529
St3gal5	11.4284	12.3134	11.1866	23.4539	27.1309	25.2928
Klhl34	0.171679	0.381974	0.388921	0.830342	0.53056	0.68884
Fam149a	0.213278	0.277938	0.343344	0.607314	0.58379	0.630353
AABR07044596.1	1.69602	1.37815	1.91893	4.1501	3.16003	3.62443
Ccdc152	5.08848	4.90301	5.15743	12.5746	12.3493	8.25918
Rtbdn	2.83126	2.44635	2.18428	6.24184	5.08562	5.04585
Rbp1	20.1971	21.3784	17.3549	42.2946	43.4336	43.6659
Galnt5	0.49679	0.423024	0.461713	0.980404	0.940126	1.11662
Bahcc1	0.0825818	0.139878	0.091606	0.187409	0.245882	0.2592
Plekhb1	4.89482	5.03103	4.87046	10.5459	10.9346	11.2403
Mybph	4.4411	4.45469	5.90624	11.0186	10.1306	11.5924
Slc7a15	0.377305	0.42737	0.581784	1.28026	0.720817	1.0666
Slc22a1	0.213888	0.232655	0.298179	0.510858	0.665898	0.476776
Nphs1	0.211459	0.0988807	0.139902	0.305369	0.398743	0.298396
Spata13	0.469951	0.319122	0.560478	0.987378	1.088	0.934633
Nog	0.485379	0.477444	0.308653	1.16817	0.694746	0.973759
Slc17a6	0.621119	0.60303	0.49616	1.55684	1.3114	0.973177
Man1a1	3.74626	3.0414	3.57164	7.21754	7.6891	8.38885
Chrm4	1.61644	1.57975	1.96563	4.2393	3.34898	4.05359
AABR07002945.2	1.32855	2.46755	1.12737	3.97334	4.23667	2.95502
Cotl1	9.14705	10.7119	10.2472	22.5133	22.8601	22.9123
Slc38a3	11.1621	10.9204	11.6837	24.355	27.1007	25.2031
Synpr	1.43091	1.24039	1.12262	2.52752	3.6602	2.44193
Myo7b	2.67315	3.27361	3.70763	8.611	6.32156	7.19665
Fbp2	0.485052	0.348131	0.450804	0.733841	1.30237	0.926018
Adap2	4.26135	4.00407	4.21543	10.093	9.58591	9.15445
Adora2b	7.46763	6.41577	7.3271	12.7645	18.4254	18.1176
Cnksr2	0.385771	0.249263	0.589369	1.00378	1.11489	0.731521
AABR07049149.1	4.20365	6.80567	7.64743	14.2621	11.867	17.4946
Pnpla1	0.233446	0.183788	0.283721	0.603581	0.436566	0.603432
Chst8	3.90215	3.75171	4.29371	8.09173	10.0806	9.84639
Ubash3a	0.186104	0.174344	0.318617	0.520636	0.597336	0.481436
Dnai2	0.476588	0.1996	0.254038	0.394449	1.01078	0.787395
Shc3	1.0672	0.827532	0.893649	1.80056	2.24663	2.53317
Maf	0.374197	0.20933	0.268284	0.63514	0.625569	0.750707
Oasl2	0.328415	0.352064	0.221983	0.834316	0.818102	0.479172
Cebpa	2.38053	1.75166	2.50889	5.30873	4.86608	5.60296
Ckb	79.4387	71.9026	72.4638	174.307	179.861	177.629
Cgn	0.645238	0.93042	0.967838	1.96	1.78708	2.30628
Mafb	8.81867	11.0362	8.11506	26.8413	17.7831	22.1148
AABR07054488.1	0.751613	0.445943	0.206976	1.10975	0.96353	1.28449
C4bpb	0.299203	0.732277	0.347597	1.11092	1.23288	0.95666
Acot7	3.21624	2.89937	3.23395	7.4446	7.44891	7.57875
Paqr5	0.129229	0.0800071	0.13577	0.2723	0.338018	0.225441
AABR07053136.1	2.50856	2.46755	2.5155	7.48227	5.71236	4.96641
AABR07051793.1	1.20743	0.795984	0.706556	2.20223	2.35865	2.01861
Ltbp1	0.113213	0.10372	0.0804622	0.294118	0.208554	0.220447
Cacnb3	76.9616	75.9491	79.7961	188.242	186.469	191.477
Igfbp1	0.353835	0.484467	0.240315	0.957403	0.796291	0.873673
LOC102554931	0.845311	0.631934	0.974176	2.24657	1.53258	2.2046
Spib	0.165162	0.104992	0.16081	0.276647	0.414816	0.362901
Mag	0.226719	0.234057	0.303424	0.609635	0.724944	0.536711
Vwa3b	1.76383	1.3219	1.1586	3.58679	3.60665	3.33903
Tas1r1	0.329377	0.429932	0.58503	1.06991	1.00735	1.27753
Adcy8	0.874943	1.12968	0.952205	2.55849	2.29391	2.53745
Olr59	0.602848	0.814473	0.614286	1.5613	1.72987	1.79957
AABR07070802.1	1.43411	1.88547	1.45402	2.80251	5.07666	4.08678
Tm6sf2	9.28311	7.71021	9.1482	19.5614	24.9936	22.126
Actrt3	0.574344	0.977198	0.769288	1.91463	1.86545	2.16892
Cpb2	5.81902	4.99795	5.44861	13.4528	13.7049	14.5561
4933403O08Rik	0.493804	0.390641	0.339954	0.843465	1.0852	1.22915
Alox15	0.244532	0.251108	0.192302	0.74252	0.457299	0.575484
Misp3	2.04735	2.07217	1.5297	5.09917	5.11135	4.3691
Sulf2	6.7139	6.24133	6.175	16.5351	15.9664	17.0891
Cpne9	3.86022	3.8956	5.05049	8.71102	13.0469	11.5128
Cd7	0.533196	0.529282	0.648025	1.55493	1.53794	1.35768
Tpm2	0.405663	0.156969	0.458981	0.840992	0.886651	0.937679
Rab20	0.140694	0.250428	0.196141	0.527889	0.48698	0.522179
Ntng1	0.0772461	0.137494	0.0861504	0.213346	0.305564	0.268614
Tgm3	0.101209	0.187076	0.137477	0.456418	0.314383	0.343614
Evpl	2.85009	2.9814	3.77719	10.0177	7.04102	8.16644
Trabd2b	0.294959	0.178981	0.0747636	0.534483	0.563501	0.349666
AABR07072264.1	0.106913	0.237874	0.149047	0.49098	0.396488	0.41557
Asb16	2.85322	2.18268	2.51051	7.72767	6.32535	5.91119
Trim80	0.241461	0.171915	0.314177	0.528481	0.891478	0.532857
Bpi	0.202776	0.415068	0.188458	0.744968	0.843903	0.579698
Gfy	56.9513	55.6124	61.9169	163.795	145.312	164.916
Tmem217	0.4013	0.941566	0.237342	1.91063	1.14247	1.24422
LOC100910270	14.1846	21.2334	16.3734	47.4997	49.4006	44.9051
Il2rb	0.190704	0.219223	0.288013	0.48447	0.700675	0.733291
Crp	1.45149	1.24693	1.43332	3.04921	4.07037	4.31739
Lct	0.322951	0.360028	0.445483	0.993822	1.14303	1.00595
Chdh	4.14061	3.44044	3.83122	9.86254	11.7015	10.506
Btbd17	0.47656	0.343339	0.513215	0.851458	1.46497	1.4341
Tspan1	0.38068	0.663472	0.42751	1.52503	1.24182	1.40014
AABR07072602.1	0.950009	0.868966	0.858406	2.33092	2.67495	2.59413
S100a4	3.24817	3.08916	4.14348	7.81614	12.3607	9.6788
Prok2	26.4606	18.7146	26.8724	50.6357	81.9788	73.5922
Gdf15	4.92505	5.56011	4.47135	13.9554	14.6755	14.249
Aox1	0.259933	0.715029	0.516103	1.5331	1.37291	1.37479
Slc2a4	3.76726	3.35276	3.76348	7.93919	13.0067	10.3962
Dnah12	0.116967	0.102588	0.135491	0.278264	0.371604	0.37409
Adam8	0.514645	0.497847	0.637743	1.39342	1.77026	1.61604
Cttnbp2	2.03567	1.79609	2.31852	6.54017	5.50639	5.89393
Lfng	0.0681153	0.155882	0.208005	0.258613	0.601442	0.400195
LOC108348106	1.20613	1.21257	0.954902	3.10775	2.96355	3.83123
Crybg2	0.199487	0.141372	0.178535	0.514002	0.505375	0.50767
Aldh1a1	3.0744	3.51668	2.94497	10.9322	8.22269	8.93955
LOC499240	0.168651	0.165104	0.313486	0.67233	0.611542	0.625937
LOC297568	0.419954	0.308033	0.26592	0.898222	1.19419	0.856392
Gas7	1.5382	1.78067	1.8488	4.30321	4.96575	6.09063
Il17rb	1.33787	1.41934	1.76219	3.96842	4.90674	4.55928
Olfml1	0.484923	0.48234	0.676026	1.72802	1.61027	1.55941
Ccdc113	0.147089	0.245446	0.136703	0.546131	0.727303	0.31353
Cd40	0.196176	0.443192	0.224399	0.695951	1.34311	0.560073
Grid2ip	0.114521	0.0911921	0.0952315	0.221439	0.278167	0.411133
Sdcbp2	0.0589083	0.249027	0.191621	0.679193	0.436923	0.398861
Defb1	2.55934	2.07437	2.84586	7.0377	9.18999	6.55567
Tnfrsf14	0.0707989	0.126018	0.1692	0.332049	0.56679	0.223199
Col5a3	0.185544	0.146781	0.258665	0.461961	0.719236	0.630731
AABR07027925.1	0.567495	0.396828	0.734629	1.41	2.20477	1.6061
Aqp8	0.13618	0.0848372	0.21516	0.383212	0.493799	0.464443
Pgm5	6.38239	5.50638	6.12456	17.218	17.6701	20.5652
Moxd1	2.68004	3.21935	2.98769	10.1001	8.26814	9.01914
Pla2g2f	0.378084	0.53061	0.216239	0.738844	1.33022	1.42949
Ttll10	0.0823007	0.0488302	0.0849885	0.21444	0.165794	0.29353
Atp1b4	0.0317614	0.0282667	0.0506037	0.141868	0.0710461	0.13199
Fcgbpl1	0.139286	0.092363	0.124375	0.546516	0.30835	0.276695
Pth1r	0.744348	0.955939	0.709306	2.24633	2.76429	2.82593
AABR07072264.3	0.654451	0.319404	0.451276	1.35317	1.20047	2.11766
Slc26a4	0.0129039	0.0861308	0.107935	0.247122	0.122294	0.310651
Cryba4	0.623839	0.462666	0.434844	1.38164	1.94934	1.66872
Anpep	0.385194	0.524606	0.520722	1.50548	1.51988	1.68019
Apod	0.367855	0.308123	0.261439	0.845712	1.24828	0.998451
Cpq	0.621223	0.746861	0.496328	2.21498	2.24542	1.70545
AC118957.2	0.428755	0.317983	1.52752	1.89916	2.82673	2.79553
Ace2	0.254598	0.439841	0.403648	0.995059	1.2157	1.44969
Trim72	2.69608	2.59294	2.55422	9.09604	8.62946	8.42733
Pax4	0.358854	0.369797	0.386177	1.44682	1.04286	1.23145
Klk1b3	0.209623	0.373118	0.331198	0.75374	1.52022	0.799032
Syk	0.110233	0.112119	0.117085	0.547769	0.279021	0.319874
Serpina6	0.621723	0.412043	0.405707	1.88189	1.41719	1.65863
Myo7a	0.0244391	0.0190314	0.0369095	0.0835772	0.11329	0.0919301
Ldb2	0.100085	0.0274071	0.0643975	0.252755	0.234754	0.208512
Crybb1	0.579161	0.441803	0.717691	1.83241	1.97735	2.54512
Fgf1	1.58901	1.45497	1.17151	4.93848	4.92329	5.5864
Efna1	1.0289	0.590381	0.868178	2.44454	3.83799	2.87897
Cacna1s	0.0561714	0.0566564	0.059166	0.278081	0.21294	0.142741
Osgin1	0.123349	0.246999	0.334367	0.899907	0.98265	0.732074
Scn7a	0.357757	0.448646	0.4194	1.4618	1.62492	1.48031
Spsb2	0.168105	0.0448827	0.187483	0.39421	0.900493	0.20235
AC128792.1	9.02409	8.38036	6.38136	30.209	32.8191	26.1721
Icam2	0.106796	0.298713	0.397021	1.08523	0.942979	0.99474
Cx3cl1	0.1064	0.112448	0.0679854	0.337879	0.378145	0.366883
Fam151a	0.505013	0.484698	0.193264	1.54805	1.5913	1.331
Vsig1	0.236303	0.116835	0.073206	0.523348	0.432754	0.658426
Cped1	0.0369208	0.0219057	0.05719	0.166747	0.182561	0.09053
Ankrd33b	0.0599615	0.0106728	0.234057	0.309343	0.415085	0.445087
Hs3st2	0.0729957	0.105567	0.0593615	0.378013	0.187989	0.347802
Wdr49	0.181243	0.193562	0.123527	0.595025	0.517797	0.812056
Slc2a9	0.548313	0.613914	0.871249	2.71908	2.65778	2.478
Stac3	0.44387	0.53868	0.312523	1.86097	1.44102	1.79446
Adamts8	1.0387	1.07134	1.45763	3.1993	5.6689	5.25786
Lyzl6	0.389413	0.554506	0.313662	2.09016	1.1767	1.74476
Dmrtb1	0.158889	0.0883793	0.258424	0.745196	0.932964	0.338684
Ltf	0.0301262	0.0268115	0.146995	0.25315	0.179998	0.400407
Hao1	0.139002	0.0123707	0.10335	0.282499	0.389479	0.390408
Igfbp2	0.113721	0.419291	0.332172	0.850826	1.64677	1.17332
AABR07018373.1	0.704903	0.888737	0.600538	3.48968	3.38869	2.47479
Fgg	0.242425	0.335613	0.325444	1.34753	1.3541	1.3915
Gpr22	0.0430977	0.145752	0.200274	0.586175	0.69969	0.527418
Abcb5	0.108089	0.0739969	0.0231824	0.305464	0.308344	0.35029
Agt	4.63657	5.21786	4.67913	25.0924	20.8783	22.3157
Frmpd4	0.0284413	0.00723198	0.022657	0.082575	0.0736646	0.118193
LOC103690017	0.255803	0.4316	0.475483	2.84934	1.85776	0.801856
Inava	0.0419106	0	0.0519352	0.147421	0.143912	0.154147
Nr1h4	0.382107	0.465351	0.588763	2.6567	2.04684	2.17869
Slc17a3	0.127274	0.13941	0.200179	0.665795	0.95206	0.648159
Tmem179	5.3462	5.83932	5.62208	28.0453	26.2921	27.3273
Ush1c	0.0290699	0.0431189	0.0630404	0.143913	0.27151	0.242998
Gpr179	0.0528857	0.0329467	0.0737273	0.351383	0.278935	0.153843
Adrb2	0.0101835	0.0815669	0.0189289	0.183083	0.167846	0.204299
Mustn1	0.873565	1.47039	1.28843	4.91348	7.43389	5.88622
AC118957.1	0.500215	0.349782	0.365276	1.70366	2.67951	1.72033
Tmprss6	1.55318	1.72786	2.02995	9.66386	8.02854	9.20882
Rdh5	0.018004	0.0480692	0.0836641	0.288501	0.222559	0.252836
Mmp17	1.42217	1.04272	1.13	5.1206	6.7103	6.62282
Gabrd	1.64687	1.54824	2.12342	9.61858	9.22324	8.87639
LOC685081	0.0267627	0.0357271	0.0746193	0.135978	0.264665	0.335569
Trim31	0.0596812	0.0986413	0.0079239	0.41986	0.210788	0.273672
LOC108348771	0.0779799	0.131089	0.217422	0.873684	0.664062	0.808284
Krt73	0.0220516	0.00981264	0.0922256	0.155134	0.263508	0.276497
RGD1564614	0.146327	0.166401	0.219103	0.902326	0.991512	1.11715
Ihh	0.475934	0.667933	0.680507	2.59701	4.38987	3.553
Prdm1	0.0055482	0.0296264	0.0309387	0.216843	0.105163	0.0779149
Rd3	0.259608	0.323462	0.410173	1.35962	2.3748	2.39578
Wfikkn2	0.0127029	0.0113052	0.023612	0.143978	0.0785144	0.0764531
Ptpre	2.72673	2.2278	2.80008	14.6263	18.3601	17.5229
Tmem72	0.0249764	0.00635094	0.0298452	0.172921	0.132321	0.107373
Arid3c	0.10119	0.0150094	0.0156743	0.250476	0.347467	0.321427
Cdcp2	0.128702	0.0327261	0.0512636	0.316181	0.772759	0.405744
Muc13	5.63142	5.57084	6.24527	46.5142	36.0438	40.1427
Ptgs1	0.140955	0.0330122	0.068949	0.568301	0.605269	0.535799
Tff3	15.8948	16.6985	16.6607	116.538	125.426	106.872
AABR07060341.2	0.0977585	0.0745734	0	0.207412	0.448856	0.574356
LOC103689949	0	0.0507727	0	0.133783	0.064646	0.171679
Ugt2a3	0.0123999	0.0110356	0.103719	0.281087	0.296348	0.373147
F13b	0.569995	0.615982	0.529749	4.726	4.57995	3.5939
Glod5	0.237993	0.0794276	0.304135	1.95334	1.20131	1.73078
Erbb3	0.010513	0.00623749	0	0.0328707	0.0606469	0.0386667
Tecta	0.0305273	0.0889148	0.0619022	0.577034	0.363645	0.534488
Serpina1	0.286352	0.169897	0.101384	2.05714	1.2923	1.23102
Lgals2	0	0.121754	0.0953605	0.802035	0.676463	0.377382
Prr29	0.0653235	0.0193787	0.0202371	0.238287	0.323002	0.349469
Apob	0.0997837	0.0509321	0.20457	1.62878	0.578048	0.977372
Spp2	0.10269	0	0.238597	0.923099	1.10016	1.18458
Pcdhgb6	0.0171999	0.0153074	0.0159854	0.0941125	0.198444	0.163904
Smim1	0.137713	0.12256	0	0.897052	0.870094	0.690693
AC131360.2	0.250642	0.161529	0.329336	2.47264	2.27212	2.27142
Mgam	0.0414999	0.130689	0.100875	0.83344	1.08389	0.954247
LOC103690028	0.161575	0.215695	0.225249	1.66714	1.83754	2.98216
Ltbp2	0.00954466	0	0.00591383	0.0646602	0.0603049	0.0414881
Fam205a	0.0157655	0.0514463	0.00976821	0.316301	0.333474	0.184499
LOC100911615	0.472816	0.437295	0.49113	3.78283	2.81925	10.1179
Taar1	0.0416309	0.129676	0.174112	1.39929	1.37234	1.79566
Ocm2	0.122321	0.0544313	0.0284212	0.573691	1.33568	0.828223
Ugt2b35	0	0.0457236	0.0119372	0.311237	0.222284	0.257677
AABR07060341.1	0.0667565	0.0297057	0	0.391362	0.467625	0.602666
Espn	1.56285	0.86931	1.48277	22.0319	18.595	20.1078
Tmc3	0	0.0167937	0	0.0983338	0.103673	0.0820225
LOC679739	1.87677	1.77049	1.32564	76.6664	15.4357	1.69432
Ebpl	0	0.0331067	0.0172866	0.348935	0.383208	0.317175
AABR07060341.3	0	0.0395019	0.0412516	0.242865	1.04249	0.534274
Lamc3	0.00437874	0	0	0.0102682	0.0721713	0.0614919
Echs1	0.238374	0.386855	0.273671	23.1269	0.0924454	13.0105
Gpr119	0.650294	0.723429	0.590643	31.5272	27.5874	28.0936
Itga9	0	0.00594877	0.00621228	0.292593	0.220342	0.181032
AC128759.2	0	0.0292364	0	0.56493	0.758038	0.626098
AABR07073039.1	0	0	0	3.25938	3.16857	2.82465
Kcnf1	0	0	0	0.0790533	0.128224	0.0312143
Icmt	0	0	0	2.14683	1.82247	1.31188
Chd5	0	0	0	0.465261	0.363349	0.391717
Gpr153	0	0	0	3.67773	3.69585	3.78823
AABR07071731.1	0	0	0	0.204628	0.093799	0.0799193
Zfp575	0	0	0	0.728456	0.120472	0.513225
Rpl22	0	0	0	20.038	20.8304	17.8919
Taar7h	0	0	0	0.558421	0.68421	0.193676
Zfp64	0	0	0	1.04826	1.17425	0.950045
AABR07037489.1	0	0	0	4.57859	4.02057	4.47085
Tshz3	0	0	0	0.542144	0.472322	0.395766
Selplg	0	0	0	0.616287	0.82572	0.741432
Hk1	0	0	0	0.103031	0.038338	0.14777
